# Supplementary material for: Hydrogen atom abstraction as a synthetic route to a square planar CoII complex with a redox-active tetradentate PNNP ligand
Source: Royal Society of Chemistry journal article supplement (doi:10.1039/d4sc03364g), 2024-01-01
Supplement: d4sc03364g1.pdf [file d4sc03364g1.pdf]

# Hydrogen Atom Abstraction as a Synthetic route to a Square Planar Co<sup>II</sup> Complex with a Redox-Active Tetradentate PNNP Ligand.

Justin D. Miller, Mitchell M. Walsh, Kyoungsoon Lee, Curtis E. Moore, and Christine M. Thomas \*

Department of Chemistry and Biochemistry, The Ohio State University, 100 W. 18<sup>th</sup> Ave,  
Columbus, OH 43210, USA. thomasc@chemistry.ohio-state.edu

## Table of Contents

|                                                                                         |    |
|-----------------------------------------------------------------------------------------|----|
| Experimental Details.....                                                               | 2  |
| General Considerations.....                                                             | 2  |
| Synthesis of (PNCH <sub>2</sub> CH <sub>2</sub> NP)Co (1).....                          | 3  |
| Synthesis of (PNCHCHNP)Co (2).....                                                      | 3  |
| Synthesis of [(PNCH <sub>2</sub> CH <sub>2</sub> NP)Co][K(18-crown-6)] (3).....         | 3  |
| Synthesis of [(PNCHCHNP)Co][K(18-crown-6)] (4).....                                     | 4  |
| Synthesis of {[(PNCHCHNP)Co(THF)][PF <sub>6</sub> ]}•THF (5).....                       | 5  |
| Synthesis of [(PNCHCHNP)Co][PF <sub>6</sub> ] <sub>2</sub> (6).....                     | 5  |
| Synthesis of [(PNCHCHNP)Co(PMe <sub>3</sub> )] [PF <sub>6</sub> ] (7).....              | 5  |
| Addition of H <sub>2</sub> to 2.....                                                    | 6  |
| H-atom abstraction from (PNCH <sub>2</sub> CH <sub>2</sub> NP)Ni (1-Ni).....            | 6  |
| Reaction of 6 with KBET <sub>3</sub> H.....                                             | 6  |
| Reaction of 2 with BuBr.....                                                            | 6  |
| NMR Spectroscopy.....                                                                   | 7  |
| Figure S26. Cyclic voltammogram of (PNCH <sub>2</sub> CH <sub>2</sub> NP)Ni (1-Ni)..... | 20 |
| Crystal Structures.....                                                                 | 21 |
| Crystal Structure Refinement Data.....                                                  | 29 |
| Magnetic Susceptibility Data.....                                                       | 33 |
| Moment vs Field Strength Graphs.....                                                    | 34 |
| Quantum Chemical Calculations.....                                                      | 38 |
| Computational Details.....                                                              | 38 |
| Spin Density Plots.....                                                                 | 39 |
| Comparison to X-ray structures.....                                                     | 42 |
| XYZ coordinates of optimized structures.....                                            | 44 |
| References.....                                                                         | 78 |

## Experimental Details

**General Considerations.** Unless otherwise noted, all manipulations were carried out under an inert atmosphere using a nitrogen-filled glovebox or standard Schlenk techniques. Glassware was oven-dried before use. Solvents were degassed by sparging with ultra-high purity argon and dried via passage through columns of drying agents using a Glass Contours solvent purification system from Pure Process Technologies. Benzene- $d_6$  was degassed via repeated freeze-pump-thaw cycles and dried over 3 Å molecular sieves before use. Tetrahydrofuran- $d_8$  and methylene chloride- $d_2$  were dried over calcium hydride overnight then vacuum transferred into a sealed Schlenk tube and stored over 3 Å molecular sieves in a nitrogen filled glovebox.  $H_2[PNNP]$ ,<sup>1</sup>  $Co[N(SiMe_3)_2]_2(THF)$ ,<sup>2</sup> and 2,4,6-tri-tert-butylphenoxy radical,<sup>3</sup> were prepared according to literature methods. 2,2,6,6-tetramethyl-1-piperidinyloxy (TEMPO) was purchased commercially then purified by sublimation and stored in a nitrogen filled glovebox.  $KC_8$  was prepared by mixing 1.1 equiv of potassium metal with one equiv of graphite powder in a vial then heating to 100 °C with occasional stirring using a glass pipet until the solid mixture turned golden brown (about 10 minutes).  $CoCl_2$  was dried at 120 °C in vacuo overnight. 18-crown-6 was dried at 60 °C in vacuo overnight. All other chemicals were purchased from commercial vendors and used without purification. NMR spectra were recorded at ambient temperature on a AVANCE NEO 400 MHz or Bruker AVANCE III HD Ascend 700 MHz NMR spectrometer.  $^1H$  and  $^{13}C$  NMR chemical shifts were referenced to residual solvent resonances and are reported in ppm.  $^{31}P$  NMR chemical shifts (in ppm) were referenced to 85%  $H_3PO_4$  (0 ppm) using an external standard. Elemental analysis (CHN) data were collected by either Midwest Microlab, Indianapolis, IN or at the Central Instrumentation Center, Department of Chemistry, University of Buffalo, Buffalo NY.

### Cyclic Voltammetry

Cyclic voltammetry measurements were conducted in a nitrogen filled glovebox using a 0.1 M  $[^nBu_4N][PF_6]$  electrolyte solution in THF using a CHI 620 E potentiostat (CH instruments Inc., Austin TX). A glassy carbon electrode was used for the working electrode, a platinum wire was used for the counter electrode, and a  $Ag/Ag^+$  reference electrode was used with 0.01 M  $AgNO_3/0.1 M [^nBu_4N][PF_6]$  as the reference solution.

### Electron Paramagnetic Resonance

X-band (9.4 GHz) EPR spectra were collected at 30 K at either 20 dB or 30 dB using a modulation amplitude of 10 G with a Bruker EMX-plus spectrometer, and simulated using EasySpin for MATLAB.<sup>4</sup> All samples were prepared in THF solutions in a nitrogen-filled glovebox and immediately frozen in liquid nitrogen once removed from the glovebox.

### Magnetic Measurements

Solid-state magnetic susceptibility measurements were obtained using a Quantum Design MPMS3 SQUID magnetometer (NanoSystems Laboratory, The Ohio State University). The sample was prepared inside a nitrogen-filled glovebox and sealed in an inert atmosphere with eicosane wax inside of a gel capsule. A plastic straw was used to suspend the sample inside the SQUID magnetometer and magnetic susceptibility measurements were collected at 1 T. Sample purity was verified using magnetic moment vs field (M vs H) plots (Figures S33-S36).

**Synthesis of (PNCH<sub>2</sub>CH<sub>2</sub>NP)Co (1).** A 500 mL round bottom flask was charged with THF (200 mL), H<sub>2</sub>[PNNP] (2.7785 g, 4.7828 mmol) and a stir bar, then placed in a liquid nitrogen-cooled cold well in the glovebox for 10 min. With stirring, a solution of Co[N(SiMe<sub>3</sub>)<sub>2</sub>]<sub>2</sub>(THF) (2.1908 g, 4.8486 mmol) in THF (20 mL) was added dropwise over 20 minutes. The solution turned from colorless to black over the course of the addition. The reaction flask was removed from the cold well and allowed to warm to room temperature and stir for 2 hours. The solvent volume was reduced to 150 mL in vacuo then pentane was added (150 mL). The resulting suspension was filtered over a medium frit and the collected solids were washed with hexanes (3 x 50 mL) to afford a shiny olive-green solid. The solid was transferred to a pre-weighed 20 mL scintillation vial and dried in vacuo to afford **1** (2.7118 g, 87.7%) as an olive-green powder. **Alternative Synthesis.** H<sub>2</sub>[PNNP] (0.0291 g, 0.0501 mmol) was dissolved in THF (4 mL) in a 20 mL scintillation vial, Co[N(SiMe<sub>3</sub>)<sub>2</sub>]<sub>2</sub>(THF) (0.0227 g, 0.0502 mmol) was dissolved in THF (4 mL) in a 20 mL scintillation vial. Each vial was placed in the glovebox freezer (-35 °C) and after 20 minutes the Co[N(SiMe<sub>3</sub>)<sub>2</sub>]<sub>2</sub>(THF) solution was added dropwise to the H<sub>2</sub>[PNNP] solution resulting in a color change from colorless to black over the course of the addition. The solution was allowed to stir for two hours, then the solvent was removed in vacuo. The remaining solid was redissolved in THF (8 mL) and pentane (8 mL) was layered on top of the resulting solution. The crystallization was placed in the glovebox freezer (-35 °C), affording crystalline solid after three days. The mother liquor was decanted and the residual solvent was removed from the crystalline solid in vacuo, affording **1** as an olive green solid (0.0164 g, 51.3%). Single crystals suitable for X-ray diffraction were grown at room temperature from the diffusion of pentane vapor into a saturated benzene solution of **1**. <sup>1</sup>H NMR (400 MHz, C<sub>6</sub>D<sub>6</sub>): δ 145.87 (br s, CH<sub>2</sub>CH<sub>2</sub>, 4 H), 17.54 (br s, Ar-H, 2 H), 13.03 (br s, Ar-H, 2 H), 8.04 (t, *J* = 7.3 Hz, *para*-PPh<sub>2</sub>, 4 H), 3.72 (d, *J* = 7.2 Hz, *ortho*-PPh<sub>2</sub>, 8 H), 2.61 (br s, *meta*-PPh<sub>2</sub>, 8 H), -2.66 (br s, Ar-H, 2 H), -16.46 (br s, Ar-H, 2 H). Elemental analysis calculated for C<sub>38</sub>H<sub>32</sub>CoN<sub>2</sub>P<sub>2</sub>: 71.59% C, 5.06% H, 4.39% N. Found: 71.03% C, 5.16% H, 4.32% N.

**Synthesis of (PNCHCHNP)Co (2).** To a 500 mL Strauss flask, a stir bar, (2,2,6,6-tetramethylpiperidin-1-yl)oxyl (TEMPO) (0.8405 g, 5.379 mmol) and **1** (0.6722 g, 1.054 mmol) were added, then the two solids were dissolved in THF (270 mL). The headspace was removed, then the Strauss flask was removed from the glovebox and heated to 55 °C in an oil bath with stirring. After two days, the flask was removed from the oil bath and allowed to cool to room temperature. The flask was brought into the glovebox and the solvent volume was reduced to 100 mL in vacuo, then the solution was split between two 150 mL jars. Pentane was layered on top of the reaction solution in each jar to achieve a 1:1 ratio of THF:pentane and placed in the glovebox freezer (-35 °C). After 3 days, the resulting crystalline solids were collected via filtration using a medium frit and the resulting red solid was washed with hexanes (3 x 50 mL). The solid was collected and dried in vacuo to yield **2** as a red powder (0.4866 g, 72.6%). Single crystals suitable for X-ray analysis were obtained from the reaction solution. <sup>1</sup>H NMR (400 MHz, C<sub>6</sub>D<sub>6</sub>): δ 39.41 (br s, Ar-H, 2 H), 29.26 (br s, Ar-H, 2 H), 4.88 (br s, PPh<sub>2</sub>, 4 H), 3.08 (br s, PPh<sub>2</sub>, 8 H), -1.97 (br s, PPh<sub>2</sub>, 8 H), -41.91 (br s, Ar-H, 2 H), -47.68 (br s, Ar-H, 2 H), -92.84 (br s, NCHCHN, 2H). Elemental analysis calculated for C<sub>38</sub>H<sub>30</sub>CoN<sub>2</sub>P<sub>2</sub>: 71.81% C, 4.76% H, 4.41% N. Found: 71.83% C, 4.50% H, 4.21% N.

**Synthesis of [(PNCH<sub>2</sub>CH<sub>2</sub>NP)Co][K(18-crown-6)] (3).** KC<sub>8</sub> (0.0410 g, 0.303 mmol) and a stir bar were added to a 20 mL scintillation vial. In a separate 20 mL scintillation vial, **1** (0.0977 g, 0.153 mmol) was dissolved in THF (18 mL) then added to the vial containing

KC<sub>8</sub> with stirring, resulting in a color change from brown to green within 5 minutes. After 10 minutes, 18-crown-6 (0.0410 g, 0.155 mmol) was dissolved in THF (2 mL) then added to the reaction mixture with stirring. After two hours the reaction mixture was filtered through Celite and an additional 10 mL THF was used to extract any remaining solid. The solvent was removed from the filtrate in vacuo. The resulting shiny black residue was redissolved in benzene (10 mL), then the solution was frozen and the volatile components were removed via lyophilization to afford **3** as a black powder (0.1381 g, 95.8%). Single crystals suitable for X-ray diffraction were grown via the diffusion of pentane vapor into a saturated benzene solution of **3**. *Note: While only one stoichiometric equivalent of KC<sub>8</sub> should be required for the reduction of 1 to 3, we report a reliable procedure that uses an excess (2 equiv) of KC<sub>8</sub> as this eliminates reproducibility concerns related to batch-to-batch variability of KC<sub>8</sub> purity, which is often difficult to assess.* <sup>1</sup>H NMR (700 MHz, THF-*d*<sub>8</sub>): δ 7.35 (m, *ortho*-PPh<sub>2</sub>, 8H), 6.93 (t, *J* = 7.3 Hz, *para*-PPh<sub>2</sub>, 4H), 6.87 (m, *Ar-H*, 2H), 6.81 (t, *J* = 7.5 Hz, *meta*-PPh<sub>2</sub>, 8H), 6.72 (t, *J* = 6.8 Hz, *Ar-H*, 2H), 6.04 (d, *J* = 8.0 Hz, *Ar-H*, 2H), 5.78 (t, *J* = 7.0 Hz, *Ar-H*, 2H), 3.32 (s, NCH<sub>2</sub>CH<sub>2</sub>N, 4H), 3.18 (br s, 18-crown-6, 24H). <sup>31</sup>P{<sup>1</sup>H} NMR (162 MHz, THF): δ 59.0 (s). <sup>13</sup>C{<sup>1</sup>H} NMR (176 MHz, THF-*d*<sub>8</sub>) δ 165.91 (m, *ipso*), 138.49 (m, *ipso*-PPh<sub>2</sub>), 133.09 (m, *ortho*-PPh<sub>2</sub>), 131.47 (s, *Ar-C*), 130.03 (s, *Ar-C*), 127.35 (m, *ipso*), 126.97 (s, *meta*-PPh<sub>2</sub>), 126.43 (s, *para*-PPh<sub>2</sub>), 107.83 (s, *Ar-C*), 107.15 (m, *Ar-C*), 70.55 (s, 18-crown-6), 53.95 (s, NCH<sub>2</sub>CH<sub>2</sub>N). Elemental analysis calculated for C<sub>50</sub>H<sub>56</sub>CoN<sub>2</sub>P<sub>2</sub>O<sub>6</sub>K: 63.82% C, 6.00% H, 2.98% N. Found: 63.82% C, 5.96% H, 3.02% N.

**Synthesis of [(PNCHCHNP)Co][K(18-crown-6)] (4).** KC<sub>8</sub> (0.0375 g, 0.277 mmol) and a stir bar were added to a 20 mL scintillation vial. In a separate 20 mL scintillation vial, **2** (0.0870 g, 0.137 mmol) was dissolved in THF (15 mL) then added to the vial containing KC<sub>8</sub> with stirring, resulting in a color change from red-orange to brown within 5 minutes. After 10 minutes, 18-crown-6 (0.0370 g, 0.140 mmol) was dissolved in THF (3 mL) then added to the reaction mixture with stirring. After two hours, the reaction mixture was filtered through Celite and an additional 5 mL THF was used to extract any residual solid. The solvent was removed from the filtrate in vacuo. The resulting shiny black residue was redissolved in benzene (5 mL), then the solution was frozen and the volatile components were removed in vacuo via lyophilization to afford **4** as a black powder (0.1142 g, 88.9%). Single crystals suitable for X-ray diffraction were grown from the diffusion of pentane vapor into a saturated benzene solution of **4**. *Note: While only one stoichiometric equivalent of KC<sub>8</sub> should be required for the reduction of 2 to 4, we report a reliable procedure that uses an excess (2 equiv) of KC<sub>8</sub> as this eliminates reproducibility concerns related to batch-to-batch variability of KC<sub>8</sub> purity, which is often difficult to assess.* <sup>1</sup>H NMR (400 MHz, C<sub>6</sub>D<sub>6</sub>): δ 7.68 (m, *ortho*-PPh<sub>2</sub>, 8H), 7.43 (m, *Ar-H*, 2H) 7.19 (t, *J* = 7.4 Hz, *Ar-H*, 2H), 6.99 (t, *J* = 7.2 Hz, *para*-PPh<sub>2</sub>, 4H), 6.94 (d, *J* = 8.0 Hz, *Ar-H*, 2H), 6.85 (t, *J* = 7.5 Hz, *meta*-PPh<sub>2</sub>, 8H), 6.73 (s, NCHCHCN, 2H), 6.46 (t, *J* = 7.1 Hz, *Ar-H*, 2H), 2.75 (br s, 18-crown-6, 24H). <sup>31</sup>P{<sup>1</sup>H} NMR (162 MHz, C<sub>6</sub>D<sub>6</sub>): δ 59.08 (s). <sup>13</sup>C{<sup>1</sup>H} NMR (176 MHz, C<sub>6</sub>D<sub>6</sub>): δ 161.78 (m, PPh<sub>2</sub> *ipso*), 137.98 (m, *ipso*), 133.12 (s, *ortho*-PPh<sub>2</sub>), 131.78 (s, *Ar-C*), 130.42 (s, *Ar-C*), 128.35 (s, *ipso*), 127.35 (s, *meta*-PPh<sub>2</sub>), 127.18 (s, *para*-PPh<sub>2</sub>), 119.00 (s, NCHCHN), 112.87 (s, *Ar-C*), 108.93 (s, *Ar-C*), 69.84 (s, 18-crown-6). Repeated attempts to collect elemental analysis data for this compound were unsuccessful. Elemental analysis calculated for C<sub>50</sub>H<sub>54</sub>CoN<sub>2</sub>P<sub>2</sub>O<sub>6</sub>K: 63.96% C, 5.80% H, 2.98% N. Found: 61.32% C, 5.59% H, 2.93% N. Due to the air sensitivity of this compound, the low carbon content could be due to oxidation during transport or handling of the material prior to analysis. For example, oxidation of the phosphine ligands would lead to

C<sub>50</sub>H<sub>54</sub>CoN<sub>2</sub>P<sub>2</sub>O<sub>8</sub>K (61.85% C, 5.61% H, 2.89% N) and these values align well with the obtained experimental data.

**Synthesis of [(PNCHCHNP)Co(THF)][PF<sub>6</sub>]<sub>2</sub>·THF (5).** FcPF<sub>6</sub> (0.0734 g, 0.222 mmol), **2** (0.1435 g, 0.2257 mmol), and a stir bar were added to a 20 mL scintillation vial, then THF (20 mL) was added with stirring, resulting in a dark purple solution within 5 minutes. After 4 h, the reaction solution was added dropwise to two vials containing pentane (10 mL each) that were then placed in the freezer (-35 °C) for 30 min. The solids were collected from the resulting suspension via filtration, followed by washing with benzene (3 x 15 mL) and hexanes (3 x 15 mL). The remaining solids were collected and dried in vacuo to afford **5** as a dark purple solid (0.1763 g, 85.4%). Single crystals suitable for X-ray diffraction were grown via diffusion of Et<sub>2</sub>O vapor into a concentrated THF solution of **5**. <sup>1</sup>H NMR (400 MHz, CD<sub>2</sub>Cl<sub>2</sub>): δ 11.28 (s, NCHCHN, 2H), 9.39 (d, Ar-H, J = 8.1 Hz, 2H), 8.61 (t, Ar-H, J = 7.5 Hz, 2H), 7.73 (br s, Ar-H, 2H), 7.50 (t, Ar-H, J = 7.8 Hz, 2H), δ 7.36 (t, *para*-PPh<sub>2</sub>, J = 7.5 Hz, 4H), 7.03 (t, J = 7.7 Hz, *meta*-PPh<sub>2</sub>, 8H), 6.62 (br s, *ortho*-PPh<sub>2</sub>, 8H), 3.61 (m, THF, 8H), 1.77 (m, THF, 8H). <sup>31</sup>P{<sup>1</sup>H} NMR (162 MHz, CD<sub>2</sub>Cl<sub>2</sub>): δ 8.74 (br, s, PPh<sub>2</sub>, 2 P), 143.17 (sept, PF<sub>6</sub>, J = 703 MHz, 1 P). <sup>13</sup>C{<sup>1</sup>H} NMR (176 MHz, CD<sub>2</sub>Cl<sub>2</sub>) δ 168.29 (s, *ipso*), 149.79 (s), 138.32 (s), 137.18 (s), 132.77 (s), 131.32 (s), 130.30 (s, *ipso*), 129.21 (s), 128.57 (s, *ipso*), 127.30 (s), 118.01 (s), 69.69 (s, THF), 26.87 (s, THF). Elemental analysis calculated for C<sub>46</sub>H<sub>46</sub>CoN<sub>2</sub>P<sub>3</sub>F<sub>6</sub>O<sub>2</sub>: 59.75% C, 5.01% H, 3.03% N. Found: 59.05% C, 5.07% H, 3.09% N.

**Synthesis of [(PNCHCHNP)Co][PF<sub>6</sub>]<sub>2</sub> (6).** FcPF<sub>6</sub> (0.0606 g, 0.183 mmol) and **5** (0.1723 g, 0.1814 mmol) were added to a 20 mL scintillation vial, then THF (18 mL) was added with stirring resulting in a dark green solution within 5 minutes. After 3 h, the reaction solution was split between two vials and pentane (10 mL each) was layered on top and the solutions were placed in a freezer (-35 °C). After three hours, the resulting green crystalline solids were collected via filtration and washed with benzene (3 x 6 mL) and hexanes (3 x 6 mL). The remaining solids were collected and dried in vacuo to yield **6** as an army-green powder (0.1420 g, 84.6 %). Single crystals suitable for X-ray analysis were grown by the diffusion of Et<sub>2</sub>O vapor into a saturated THF solution of **6** at room temperature. <sup>1</sup>H NMR (400 MHz, THF-*d*<sub>8</sub>): δ 14.10 (br s), 8.95 (br s), 7.40 (br s), 7.00 (br s), 5.40 (br s). Elemental analysis calculated for C<sub>38</sub>H<sub>30</sub>CoN<sub>2</sub>P<sub>4</sub>F<sub>12</sub>: 49.32% C, 3.27% H, 3.03% N. Found: 49.31% C, 3.98% H, 3.01% N.

**Synthesis of [(PNCHCHNP)Co(PMe<sub>3</sub>)]PF<sub>6</sub> (7).** Complex **5** (0.0805 g, 0.0870 mmol) was added to a 20 mL scintillation vial, dissolved in THF (10 mL) with stirring, then PMe<sub>3</sub> (9.9 μL, 0.096 mmol) was added via glass syringe resulting in a color change from dark purple to dark red within 5 minutes. After 30 min, the solvent volume was reduced to 5 mL, pentane (15 mL) was added, and the vial was placed in the freezer (-35 °C). After three hours, the resulting red crystalline solids were collected via filtration, washed with benzene (3 x 5 mL), then hexanes (3 x 5 mL). The remaining solids were collected and dried in vacuo to yield **7** as a red powder (0.0746 g, 95.2%). Single crystals suitable for X-ray analysis were grown from a C<sub>6</sub>D<sub>6</sub> / THF solution at room temperature. <sup>1</sup>H NMR (400 MHz, CD<sub>2</sub>Cl<sub>2</sub>): δ 8.65 (d, J = 8.2 Hz, 2H), 8.11 (m, 2H), 7.60 (t, J = 7.5 Hz, 2H), 7.55 (m, PPh<sub>2</sub>, 4H), 7.46 (m, 2H), 7.37 (m, PPh<sub>2</sub>, 4H), 7.29 (m, PPh<sub>2</sub>, 4H), 7.17 (t, J = 7.5 Hz, 2H), 6.92 (t, J = 7.8 Hz, PPh<sub>2</sub>, 4H), 6.84 (m, PPh<sub>2</sub>, 4H), 0.44 (d, J = 9.8 Hz, PMe<sub>3</sub>, 9H). <sup>31</sup>P{<sup>1</sup>H} NMR (162 MHz, CD<sub>2</sub>Cl<sub>2</sub>): δ 52.29 (br, s, PPh<sub>2</sub>, 2P), 8.60 (br, s, PMe<sub>3</sub>, 1P), -143.95 (sept, PF<sub>6</sub>, J = 710 Hz, 1P). <sup>13</sup>C{<sup>1</sup>H} NMR (100 MHz, CD<sub>2</sub>Cl<sub>2</sub>) δ 158.72 (m, *ipso*), 136.93 (d, J = 1.8 Hz), 134.46 (d, J = 2.9 Hz), 133.79 (t, J = 4.9 Hz), 133.25 (d, J = 3.0 Hz), 132.68 (m,

*ipso*), 132.24 (s), 132.07 (t,  $J = 5.8$  Hz), 131.70 (m, *ipso*), 130.85 (s), 129.64 (t,  $J = 5.0$  Hz), 128.99 (t,  $J = 5.2$  Hz), 128.33 (m, *ipso*), 127.38 (m), 116.18 (m), 13.66 (d,  $J = 23.5$  Hz,  $\text{PMe}_3$ ). Elemental analysis calculated for  $\text{C}_{41}\text{H}_{39}\text{CoF}_6\text{N}_2\text{P}_2$ : 57.49% C, 4.59% H, 3.27% N. Found: 57.49% C, 5.05% H, 3.09% N.

**Addition of  $\text{H}_2$  to **2**.** Complex **2** (0.0042 g, 0.0066 mmol) was dissolved in  $\text{C}_6\text{D}_6$  (1 mL) then added to a J. Young tube in a nitrogen filled glovebox. The J. Young tube was then removed from the glovebox and two freeze-pump-thaw cycles were performed. The J. Young tube was then submerged in a dry ice/isopropanol cold bath. After 10 minutes,  $\text{H}_2$  was added, the Teflon valve on the J. Young tube was closed, and the solution was allowed to warm to room temperature. After 4 h, the sample was analyzed using  $^1\text{H}$  NMR spectroscopy (Figure S19).

**H-atom abstraction from  $(\text{PNCH}_2\text{CH}_2\text{NP})\text{Ni}$  (**1-Ni**).**  $(\text{PNCH}_2\text{CH}_2\text{NP})\text{Ni}$  (**1-Ni**) (0.0151 g, 0.0237 mmol) was added to a 20 mL scintillation vial and dissolved in THF (3 mL), then a THF solution (3 mL) of 2,4,6-tri-*tert*-butylphenoxy radical (0.0156 g, 0.0597 mmol) was added with stirring. After stirring overnight, an aliquot was taken, dried in vacuo, then redissolved in  $\text{C}_6\text{D}_6$  for NMR analysis (Figure S23, top). On the same day, additional 2,4,6-tri-*tert*-butylphenoxy radical (0.0153 g, 0.0585 mmol) was added and the reaction was allowed to stir. After 2 days an aliquot of the reaction solution was used for  $^{31}\text{P}\{^1\text{H}\}$  NMR analysis (Figure S23, middle). The remaining reaction solution was reduced to 3 mL in vacuo, then pentane (15 mL) was added. After 20 min the resulting suspension was filtered, the residual solid was washed with hexanes (3 mL), then extracted into THF. Solvent was removed from the THF extract in vacuo then the remaining solid was used for NMR analysis (Figure S23, bottom). **Discussion:** The hydrogen atom abstraction product,  $(\text{PNCHCHNP})\text{Ni}$  (**2-Ni**), could not be isolated without the presence of the saturated **1-Ni** complex or other impurities. An equilibrium likely exists between **1-Ni** and **2-Ni**. As the concentration of the hydrogen atom abstractor increases the equilibrium favors the dehydrogenated compound **2-Ni**, but when this hydrogen atom abstractor is removed the equilibrium shifts back to regenerate the unsaturated analogue **1-Ni**.

**Reaction of **6** with  $\text{KBET}_3\text{H}$ .** Complex **6** (0.0212 g, 0.0229 mmol) was added to a 20 mL scintillation vial and dissolved in THF (4 mL), then a THF solution (2.0 M) of  $\text{KBET}_3\text{H}$  was added via glass syringe (50.0  $\mu\text{L}$ , 0.050 mmol). The solution was stirred for 3 h then an aliquot (1 mL) was collected, and the volatiles were removed from it in vacuo. The residual solid was dissolved in  $\text{C}_6\text{D}_6$  for NMR analysis shown in Figure S24.

**Reaction of **2** with BuBr.** Complex **2** (0.0204 g, 0.0321 mmol) was added to a 20 mL scintillation vial and dissolved in THF (5 mL), then BuBr (3.5  $\mu\text{L}$ , 0.0324 mmol) was added via glass syringe. After stirring for 22 h an aliquot (1 mL) of the reaction solution was collected and the volatiles were removed from it in vacuo. The resulting solid was dissolved in  $\text{C}_6\text{D}_6$  for NMR analysis shown in Figure S25 (top). The volatiles were removed from the remaining reaction solution, then the resulting solid was dissolved in  $\text{C}_6\text{H}_6$  (3 mL), frozen and lyophilized. The lyophilized solid was washed with hexanes (20 mL),  $\text{Et}_2\text{O}$  (15 mL), then the remaining solid was extracted into PhF (5 mL). The volatiles were then removed from the hexanes,  $\text{Et}_2\text{O}$ , and PhF solutions and the remaining solids for each were dissolved in  $\text{C}_6\text{D}_6$  for NMR analysis (Figure S25, middle for hexanes and Figure S25, bottom for PhF).

## NMR Spectroscopy

**Figure S1.**  $^1\text{H}$  NMR spectrum of **1** (400 MHz,  $\text{C}_6\text{D}_6$ ). # denotes residual  $\text{C}_6\text{D}_5\text{H}$ .

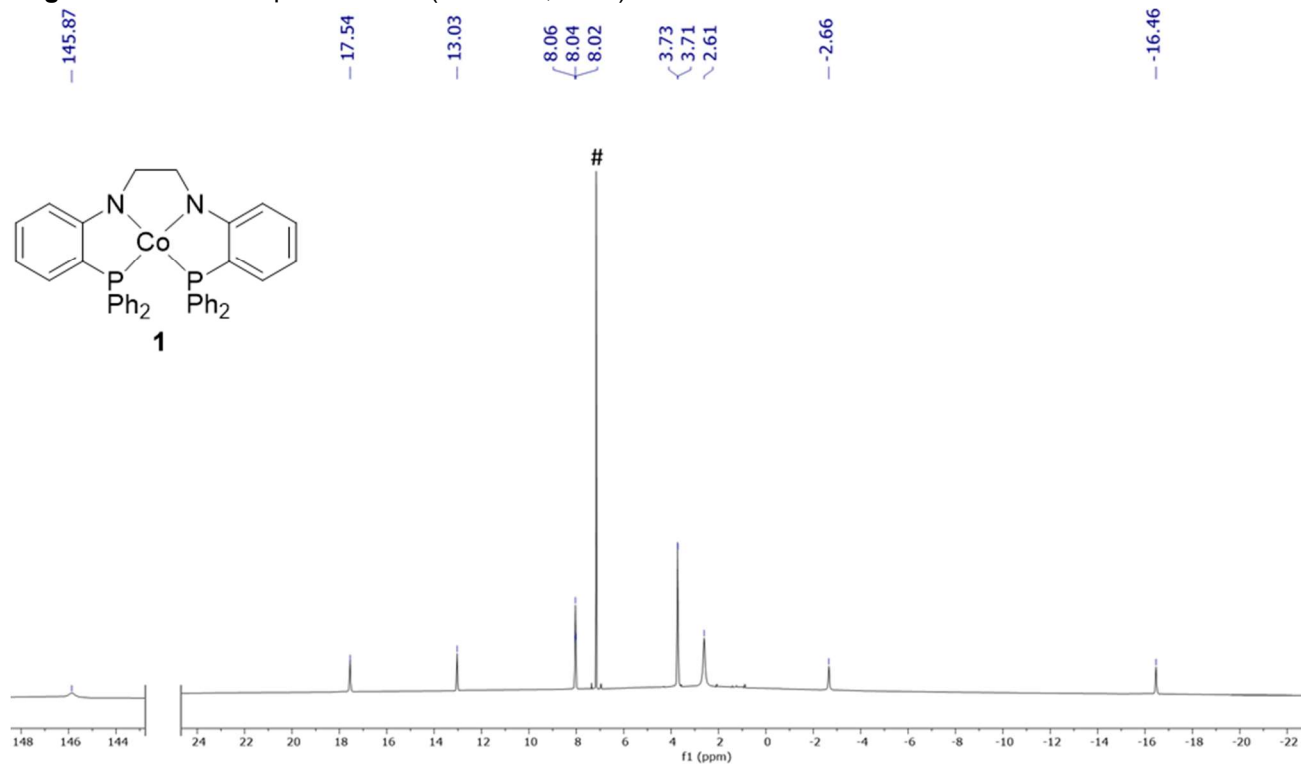

**Figure S2.**  $^1\text{H}$  NMR spectrum of **2** (400 MHz,  $\text{C}_6\text{D}_6$ ). Stars denote residual solvent impurities ( $\text{C}_6\text{D}_5\text{H}$ , THF and hexanes).

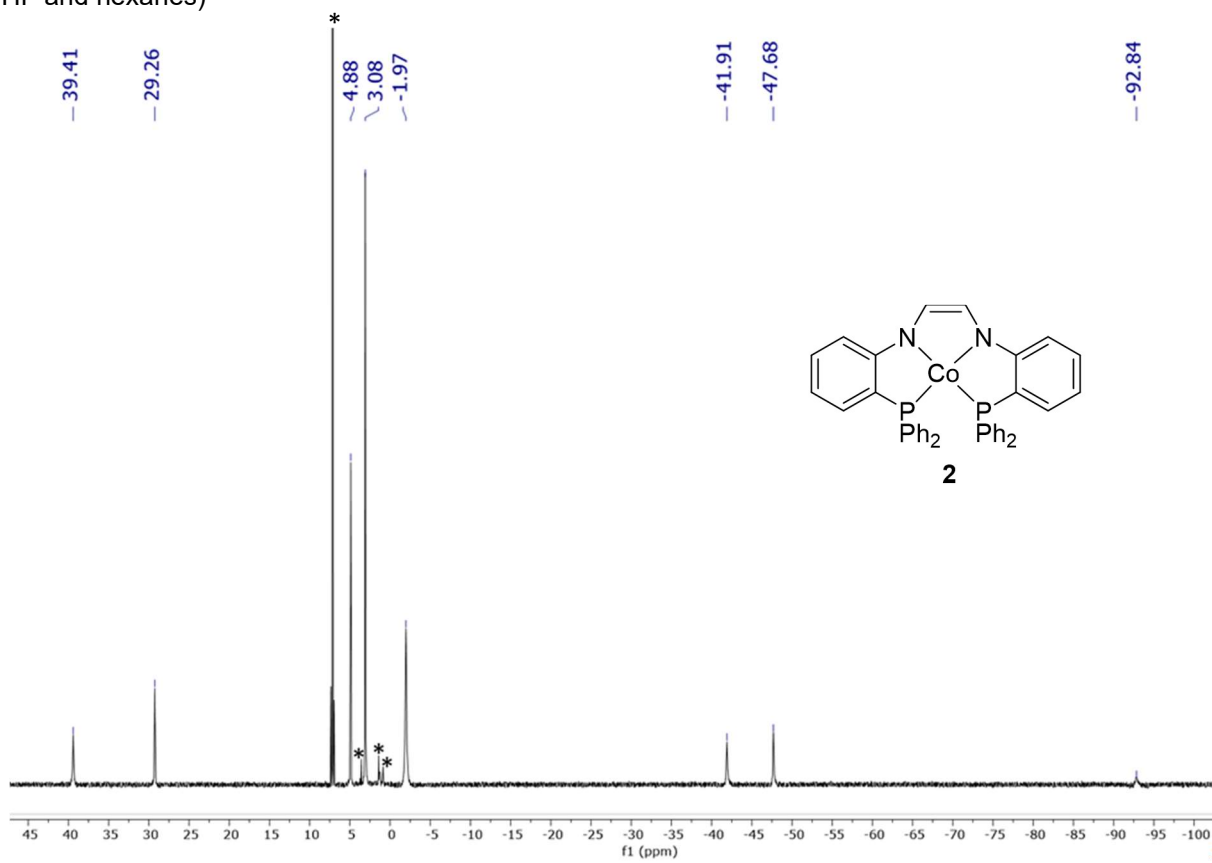

**Figure S3.**  $^1\text{H}$  NMR spectrum of **2** (400 MHz,  $\text{C}_6\text{D}_6$ ) synthesized from TEMPO (top) and 2,4,6-tri-*tert*-butylphenoxy radical (bottom).

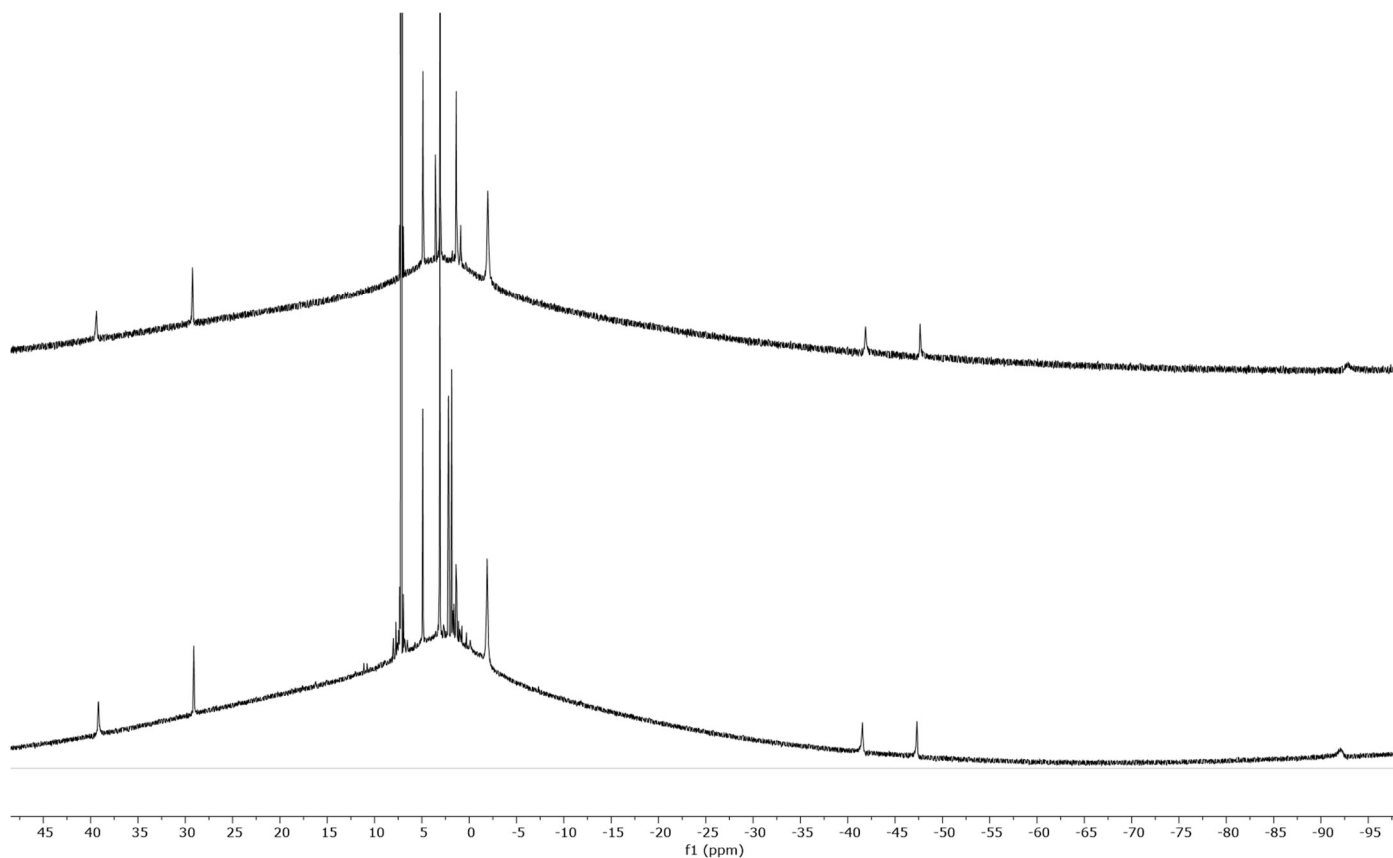

**Figure S4.**  $^1\text{H}$  NMR spectrum of **3** (700 MHz,  $\text{THF-}d_8$ ). Residual THF is denoted with a # and residual benzene is denoted with a \*.

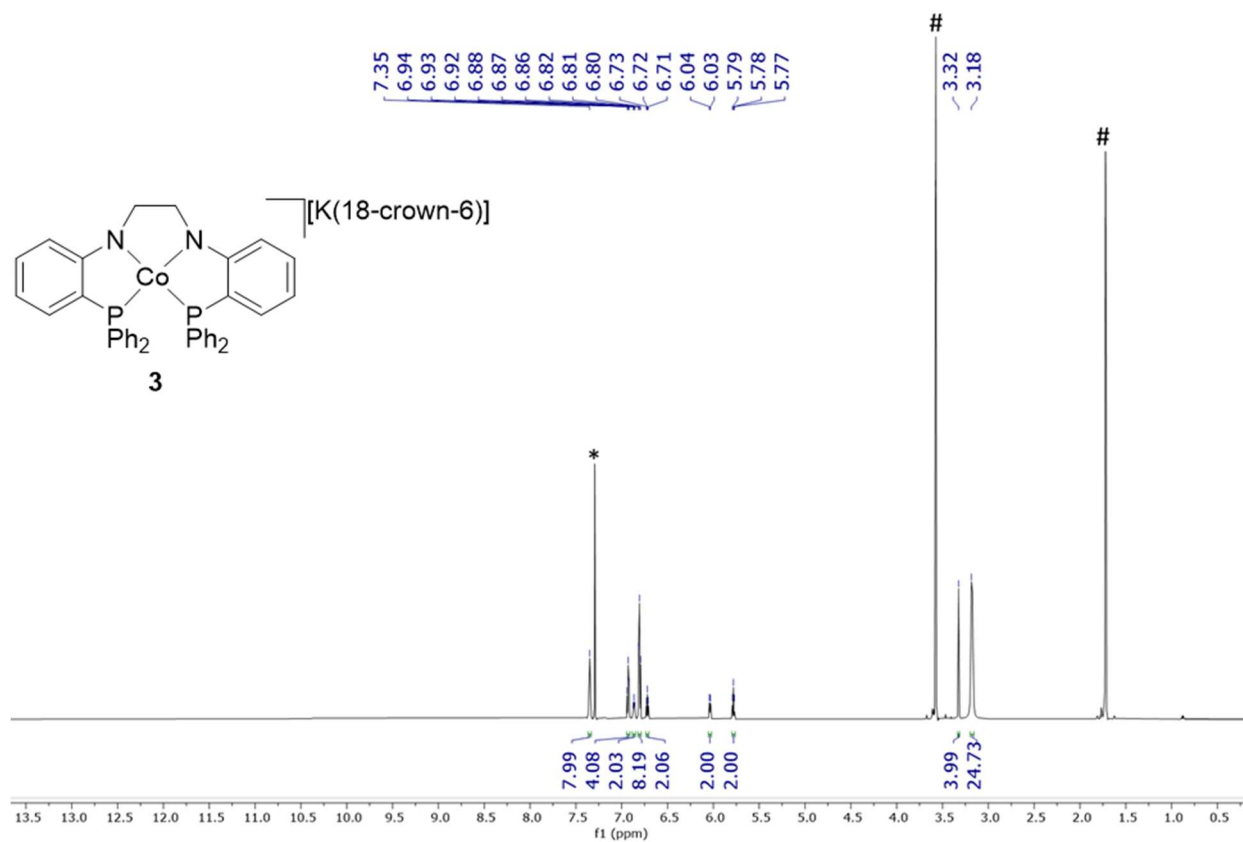



**Figure S5.**  $^{13}\text{C}\{^1\text{H}\}$  NMR spectrum of **3** (176 MHz,  $\text{THF-}d_3$ ). Residual THF is denoted with a # and benzene is denoted with a \*.

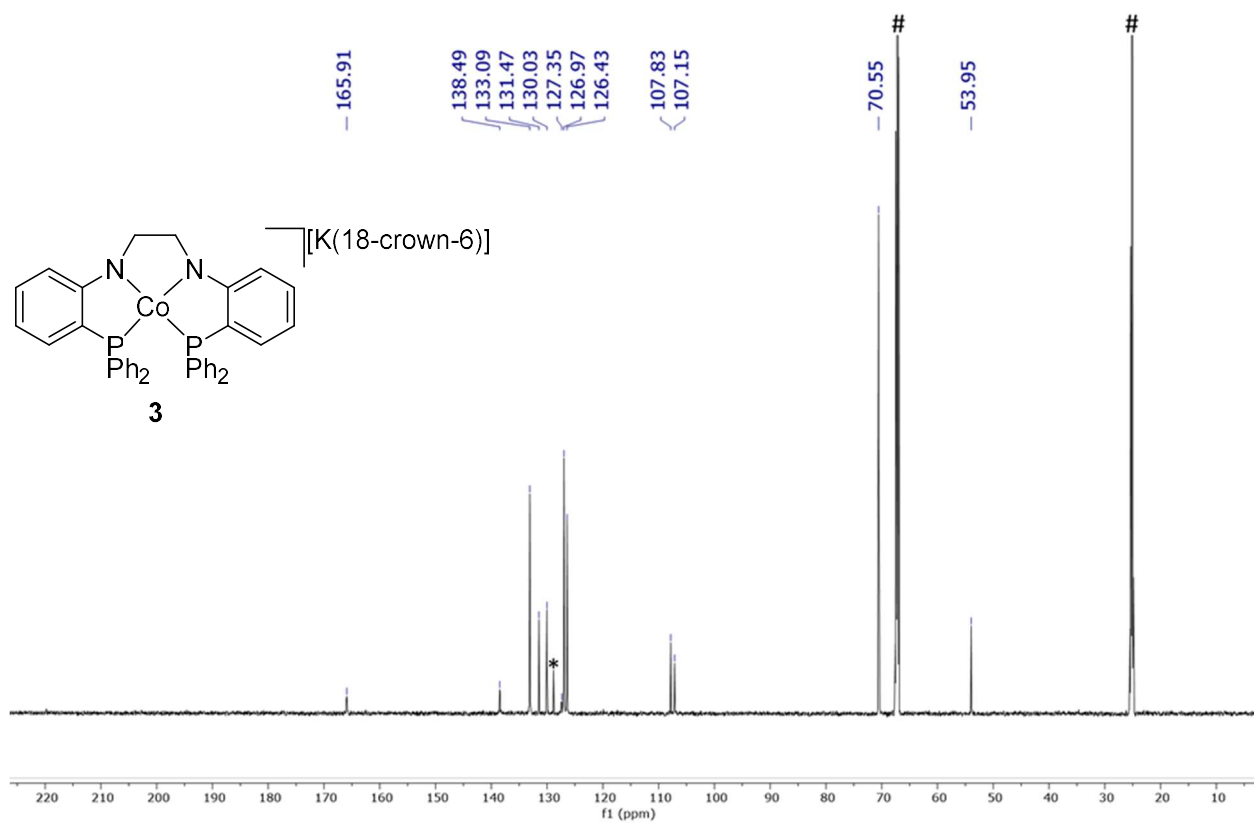

**Figure S6.**  $^{31}\text{P}\{^1\text{H}\}$  NMR of **3** (162 MHz in THF).

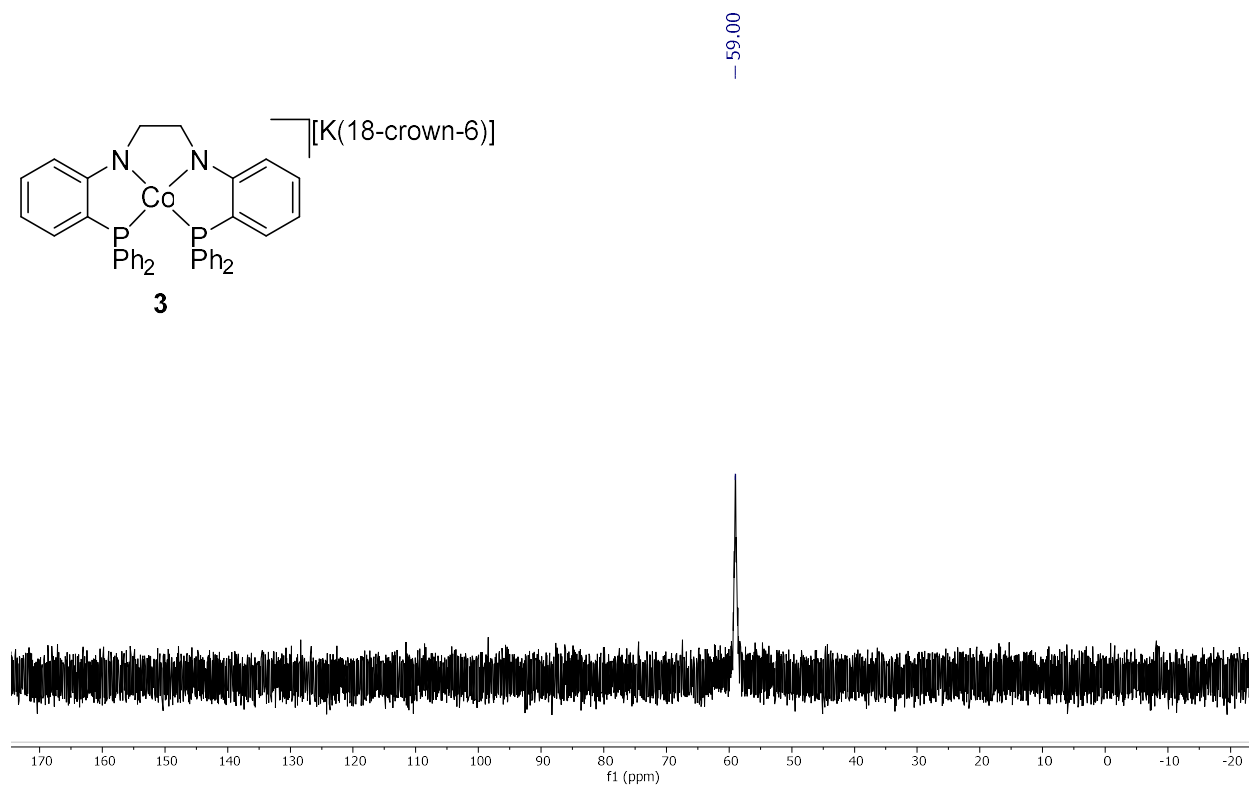

**Figure S7.**  $^{13}\text{C}$ - $^1\text{H}$  HSQC spectrum of **3** (700 MHz,  $\text{THF-}d_8$ ) of. Cross peaks assigned to THF and benzene are labeled.

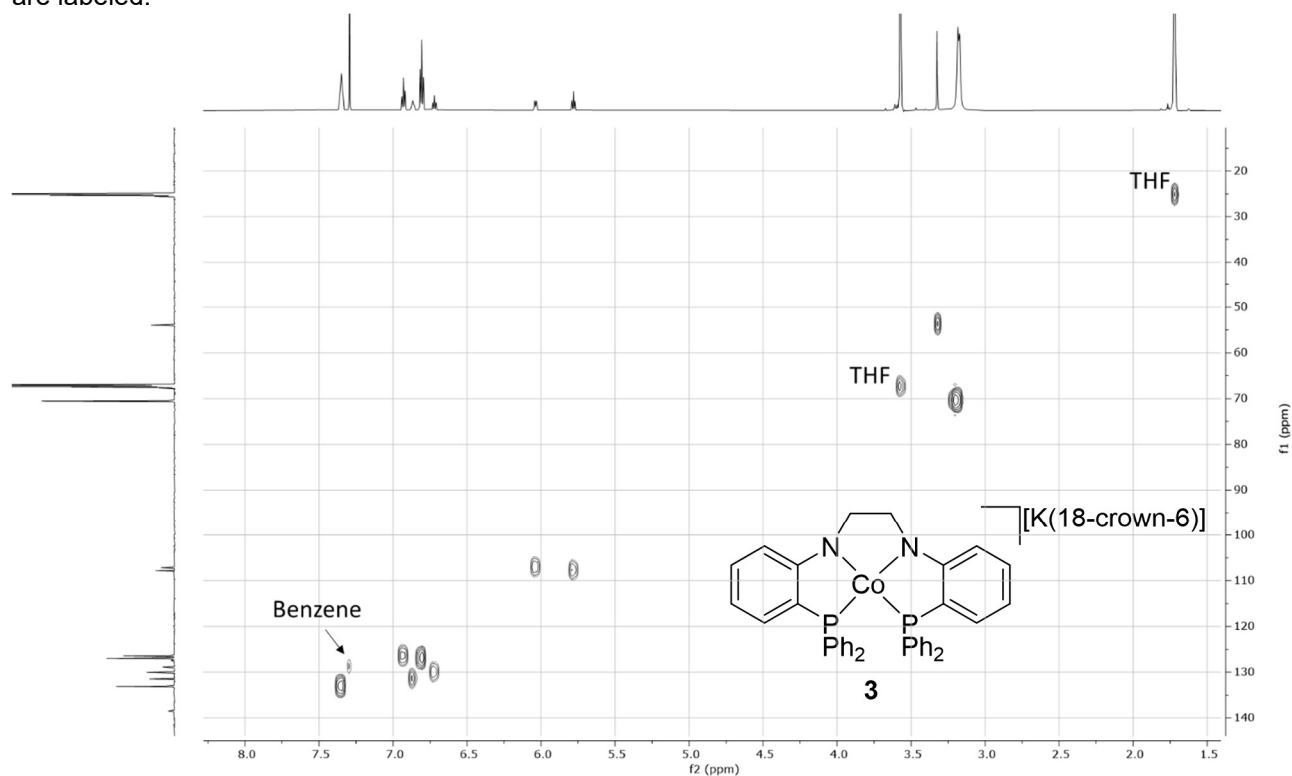

**Figure S8.**  $^{13}\text{C}$ - $^1\text{H}$  HMBC spectrum of **3** (700 MHz,  $\text{THF-}d_8$ ). Cross peaks assigned to THF are labeled.

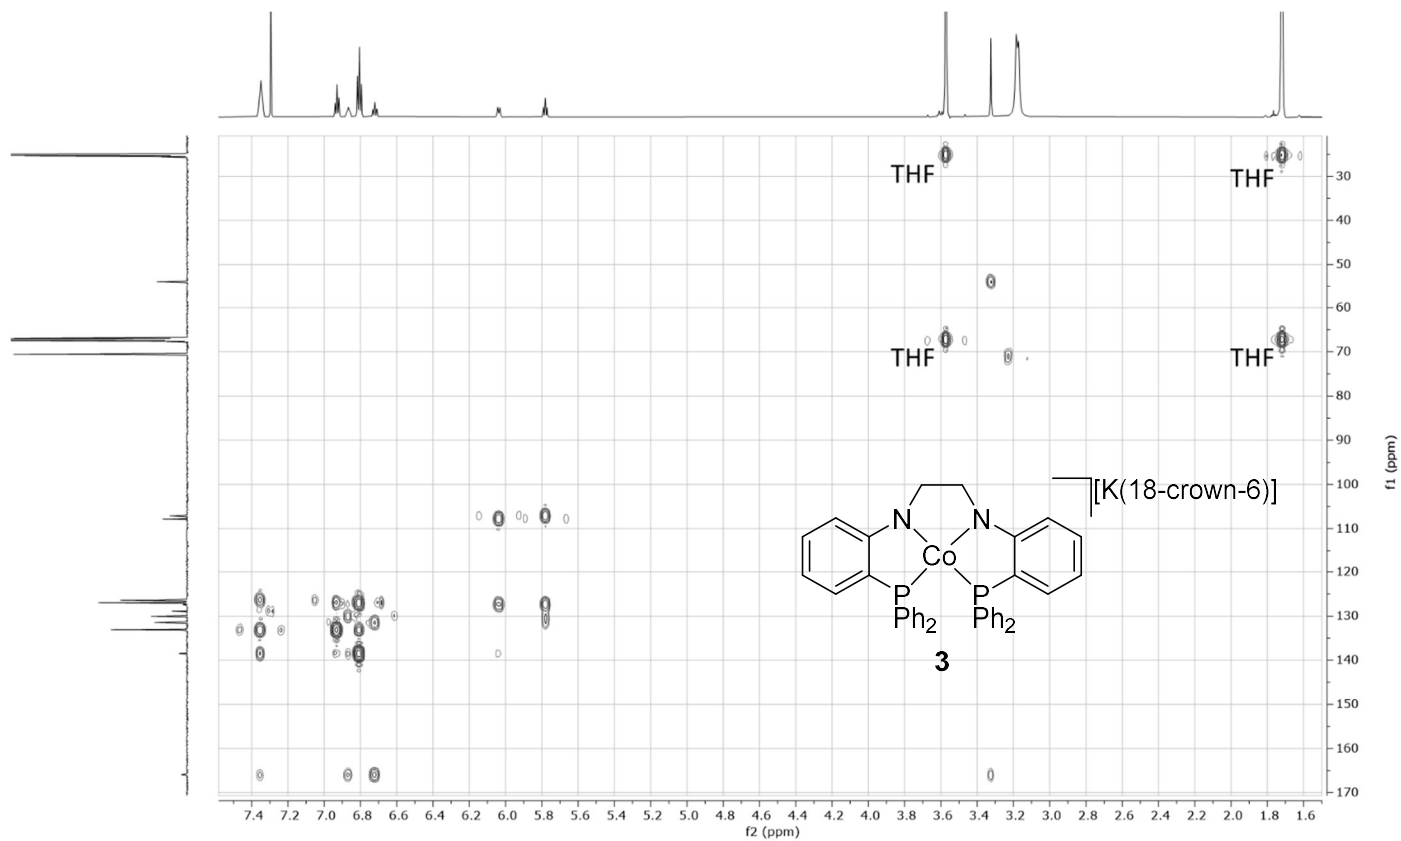

**Figure S9.**  $^1\text{H}$  NMR spectrum of **4** (400 MHz,  $\text{C}_6\text{D}_6$ ). Residual  $\text{C}_6\text{D}_5\text{H}$  is denoted with a #.

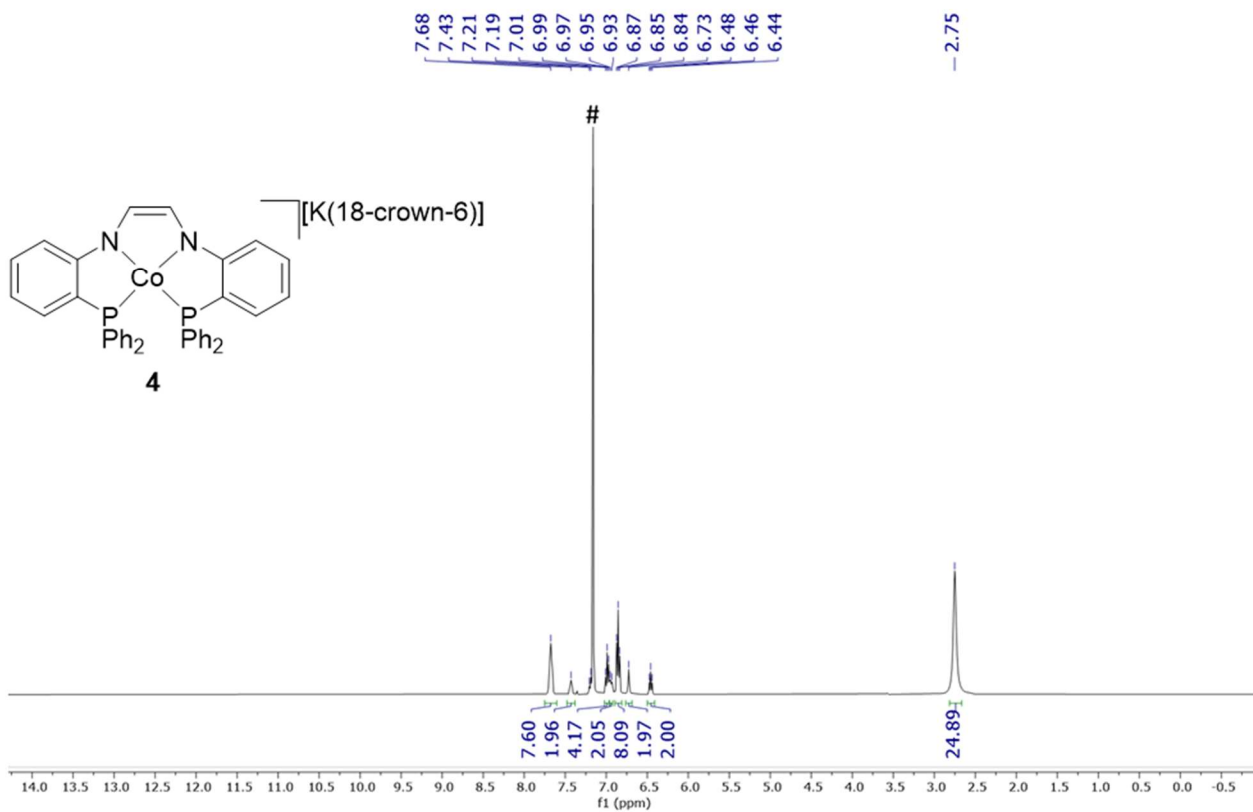

**Figure S10.**  $^{13}\text{C}\{^1\text{H}\}$  NMR spectrum of **4** (176 MHz,  $\text{C}_6\text{D}_6$ ). An inset was added to show the region around the residual  $\text{C}_6\text{D}_6$ .  $\text{C}_6\text{D}_6$  is denoted with a # and residual  $\text{C}_6\text{H}_6$  is denoted with a \*.

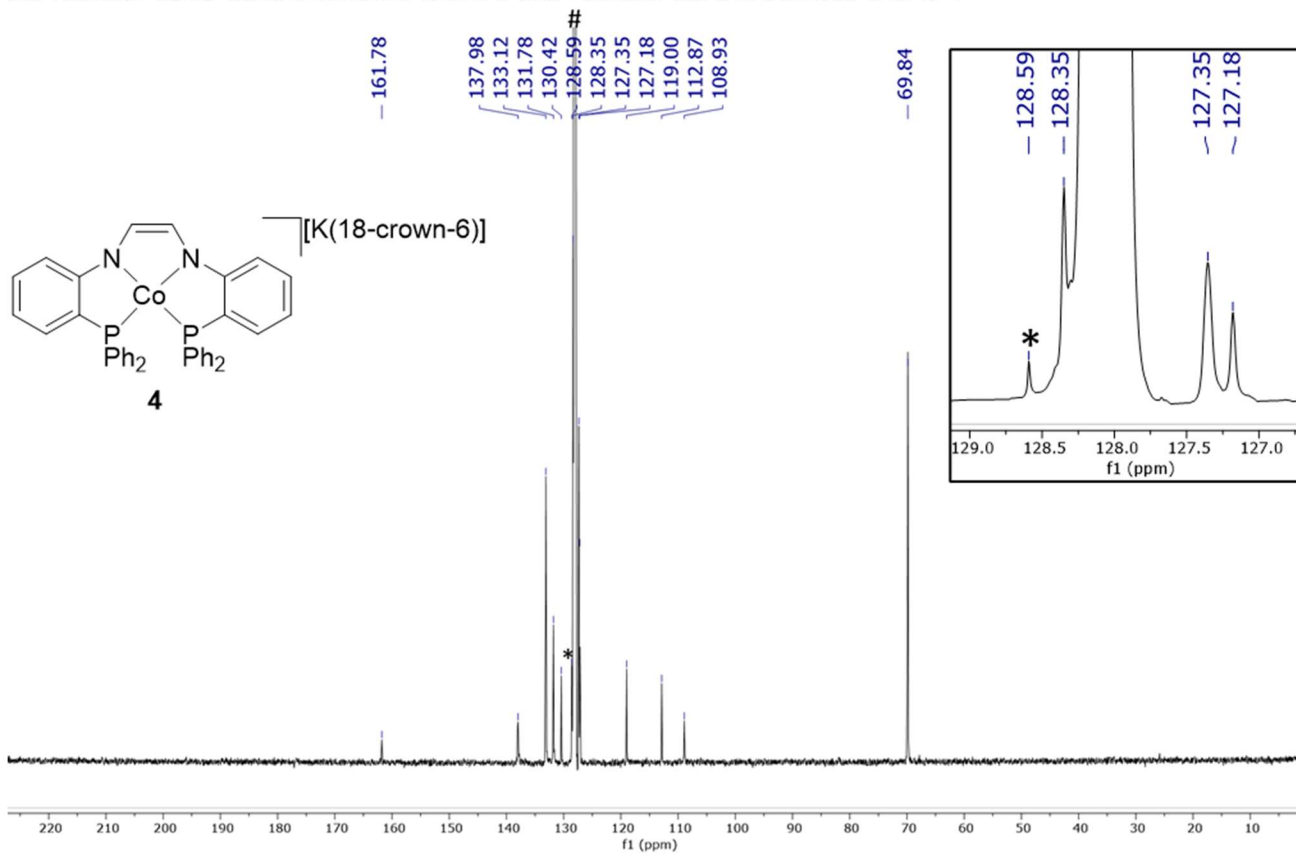

**Figure S11.**  $^{31}\text{P}\{^1\text{H}\}$  NMR of **4** (162 MHz in  $\text{C}_6\text{D}_6$ ).

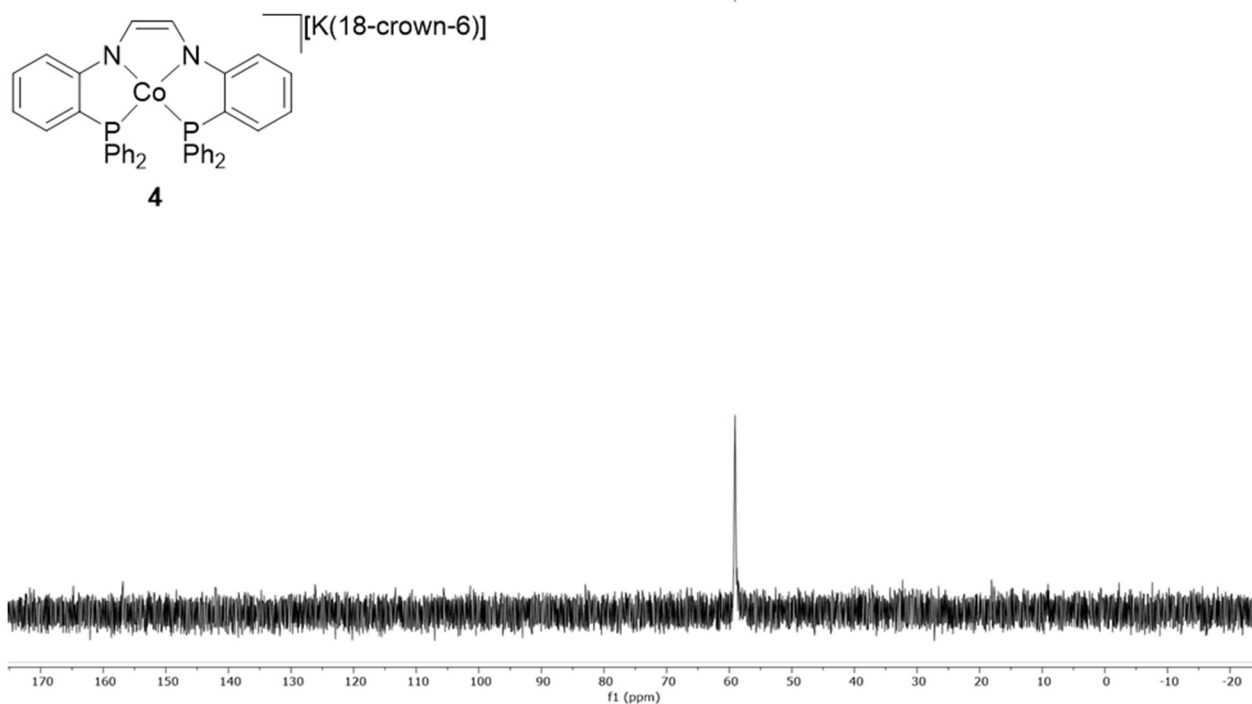

**Figure S12.**  $^{13}\text{C}\text{-}^1\text{H}$  HSQC spectrum (700 MHz,  $\text{C}_6\text{D}_6$ ) of **4**. The peak assigned to residual  $\text{C}_6\text{H}_6$  is labeled.

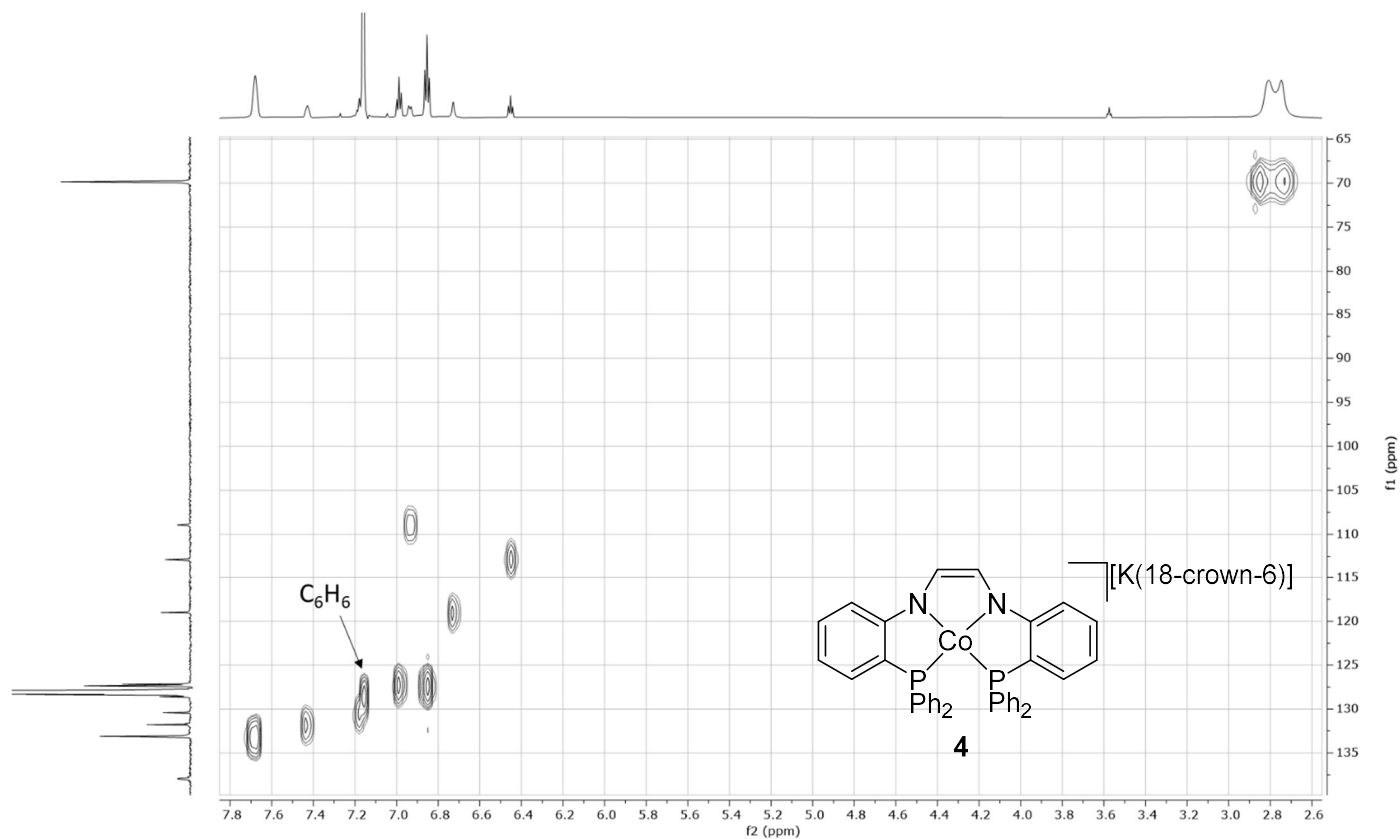

**Figure S13.**  $^{13}\text{C}$ - $^1\text{H}$  HMBC spectrum of **4** (700 MHz,  $\text{C}_6\text{D}_6$ ).

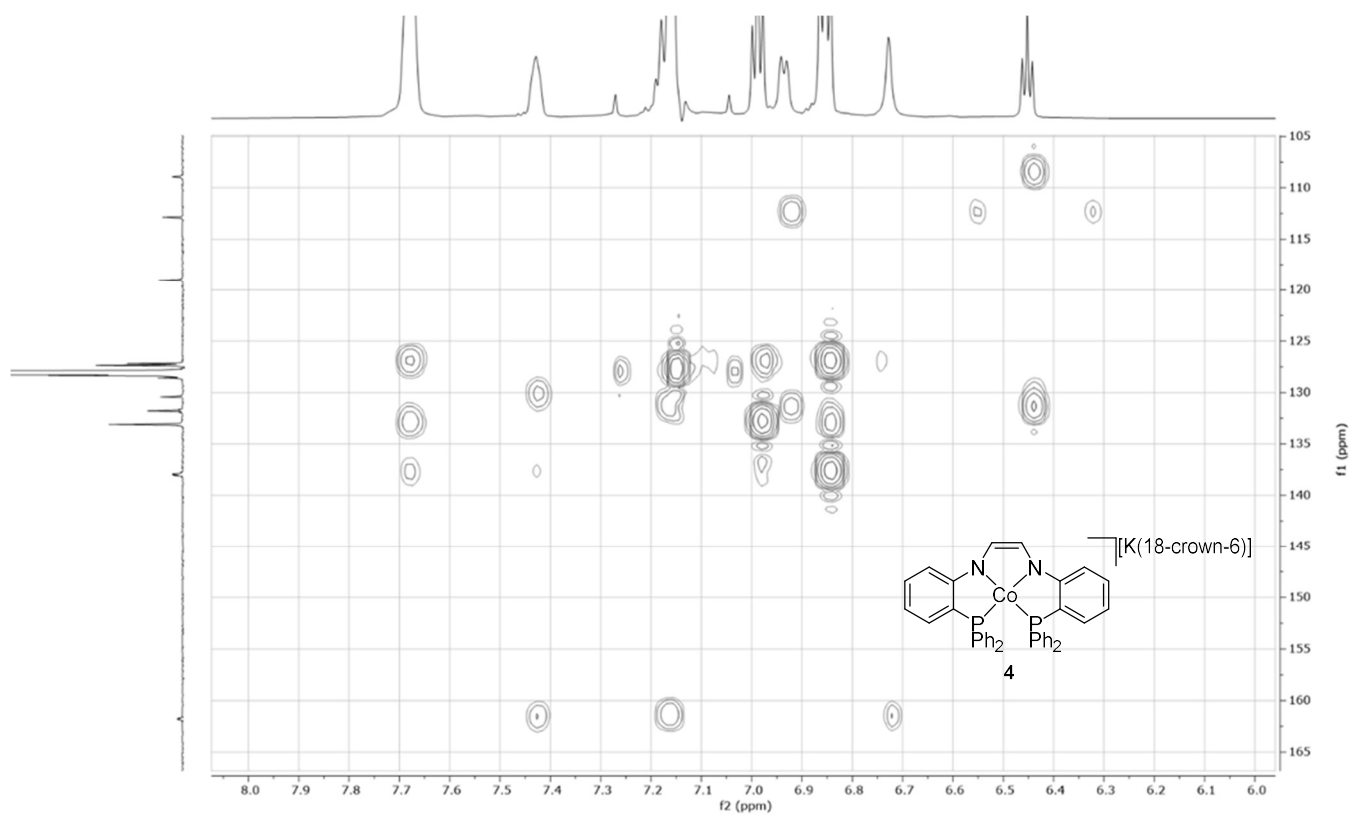

**Figure S14.**  $^1\text{H}$  NMR spectrum of **5** (400 MHz,  $\text{CD}_2\text{Cl}_2$ ). Stars denote residual solvent impurities (diethyl ether and hexanes). Residual  $\text{CH}_2\text{Cl}_2$  is denoted with a #.

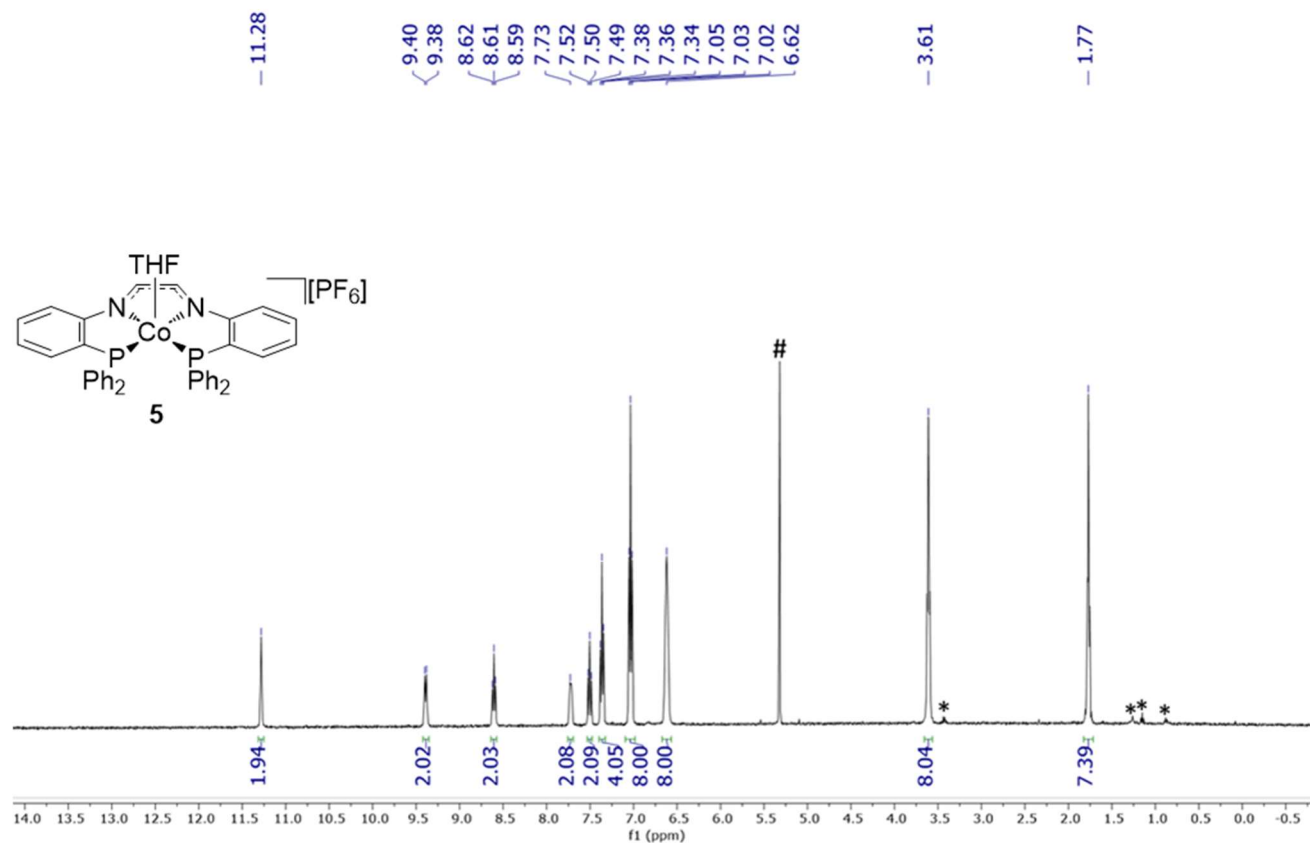

**Figure S15.**  $^{13}\text{C}\{^1\text{H}\}$  NMR spectrum of **5** (176 MHz,  $\text{CD}_2\text{Cl}_2$ ). Residual  $\text{CD}_2\text{Cl}_2$  is denoted with a #.

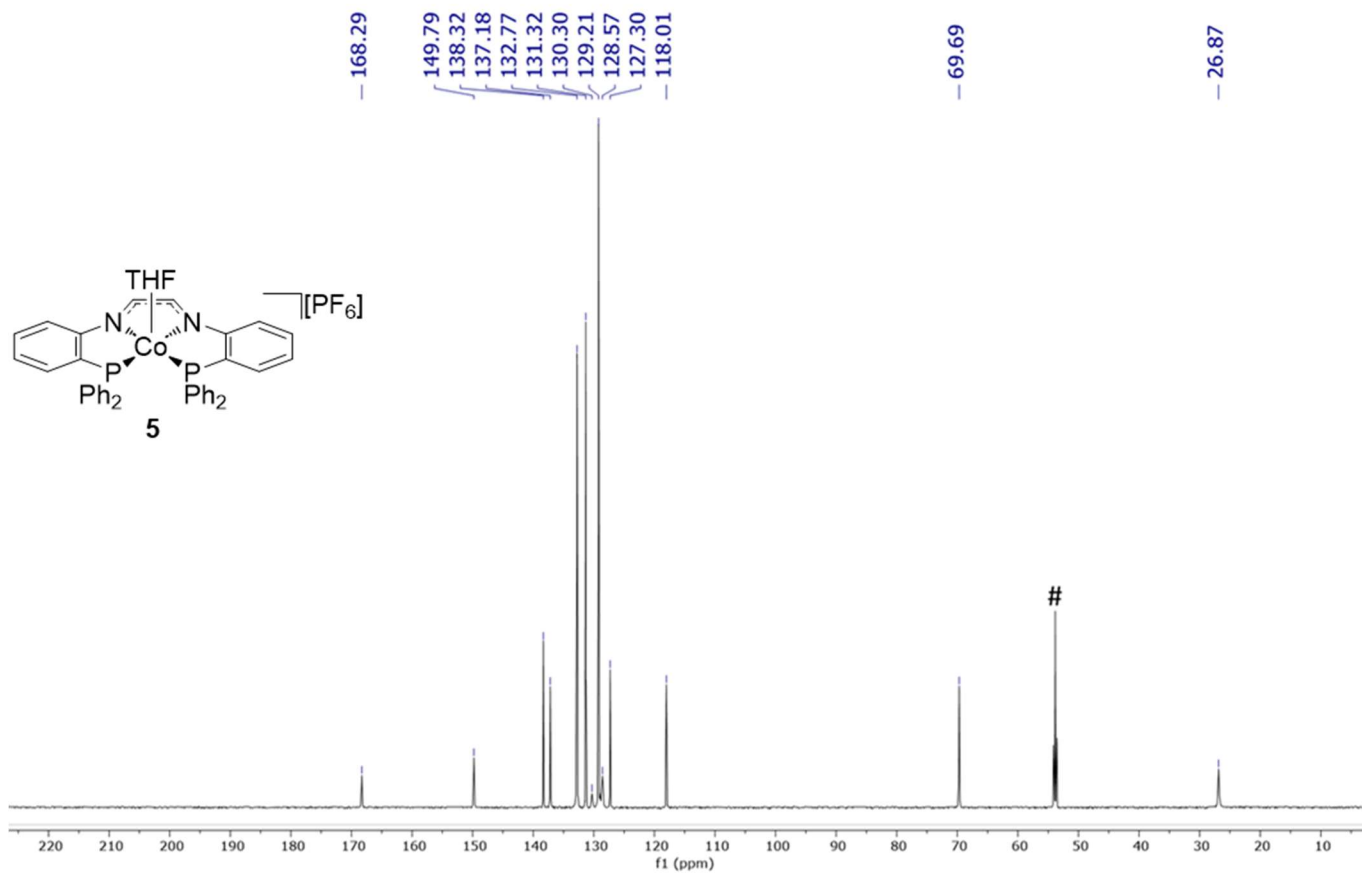

**Figure S16.**  $^{31}\text{P}\{^1\text{H}\}$  NMR spectrum of **5** (162 MHz,  $\text{CD}_2\text{Cl}_2$ ).

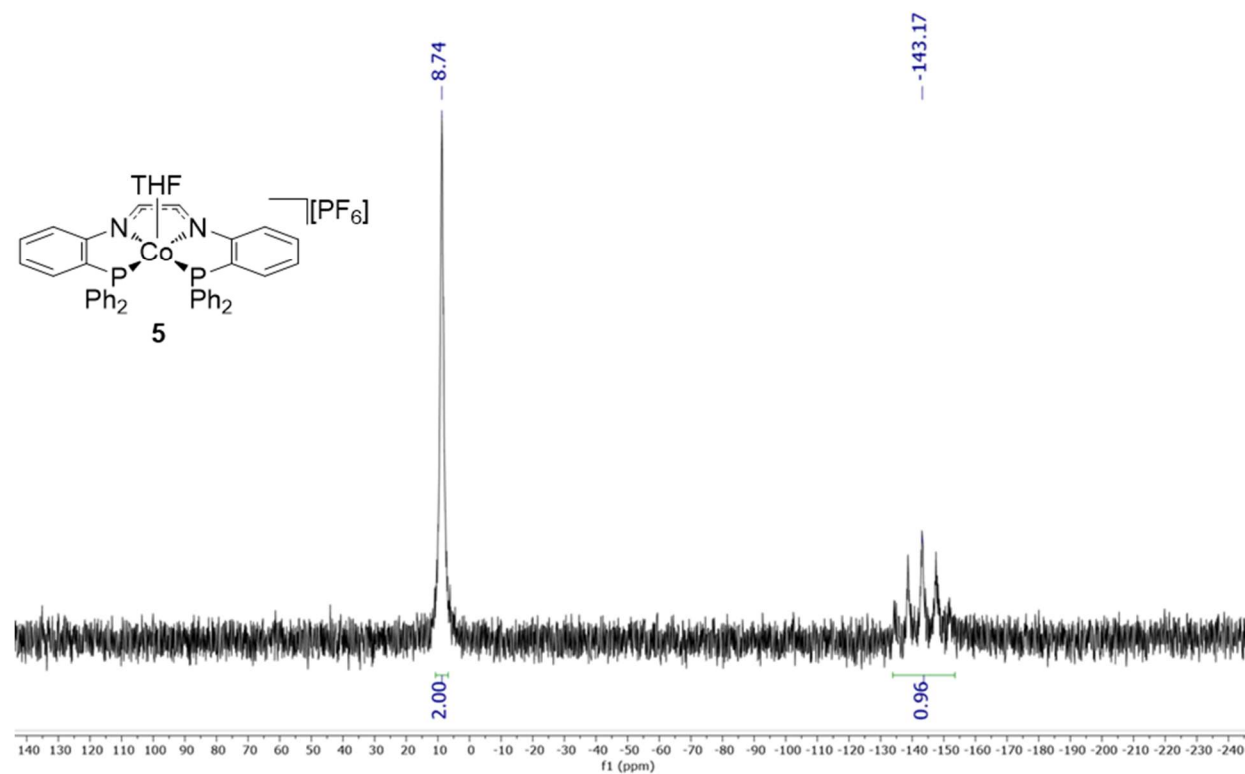

**Figure S17.**  $^1\text{H}$  NMR spectrum of **6** (400 MHz,  $\text{THF-}d_8$ ). Stars denote residual pentane and grease. Residual THF is labeled with a #.

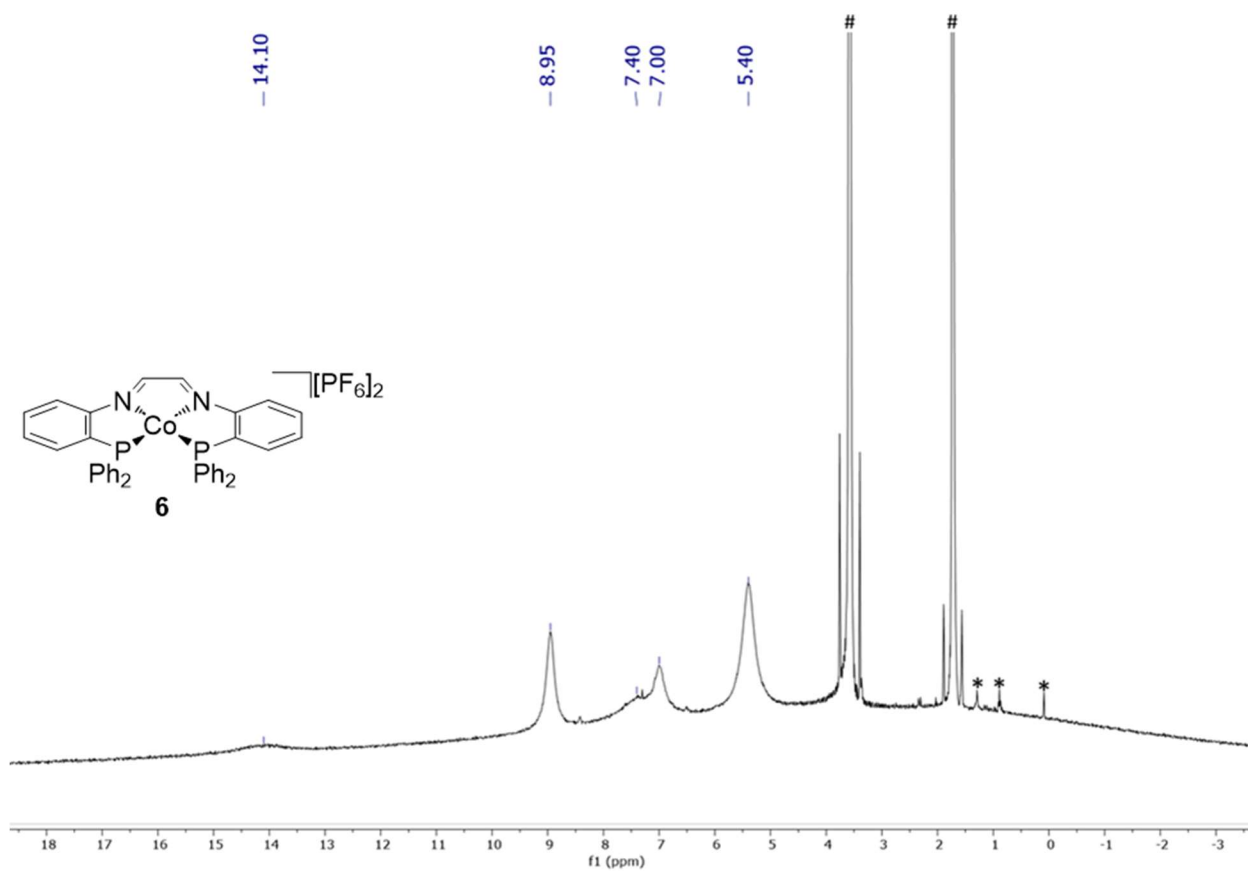

**Figure S18.** (A) Variable temperature  $^1\text{H}$  NMR spectra (600 MHz,  $\text{CD}_2\text{Cl}_2$ ) from 290-190 K of **5** (B)  $^1\text{H}$  NMR spectrum of **5** at 190 K showing two sets of THF peaks and 11 aromatic peaks, consistent with the reduced symmetry of **5** due to slow exchange of two THF molecules. Residual  $\text{CH}_2\text{Cl}_2$  is denoted with a # and residual hexanes is labeled with a \*.

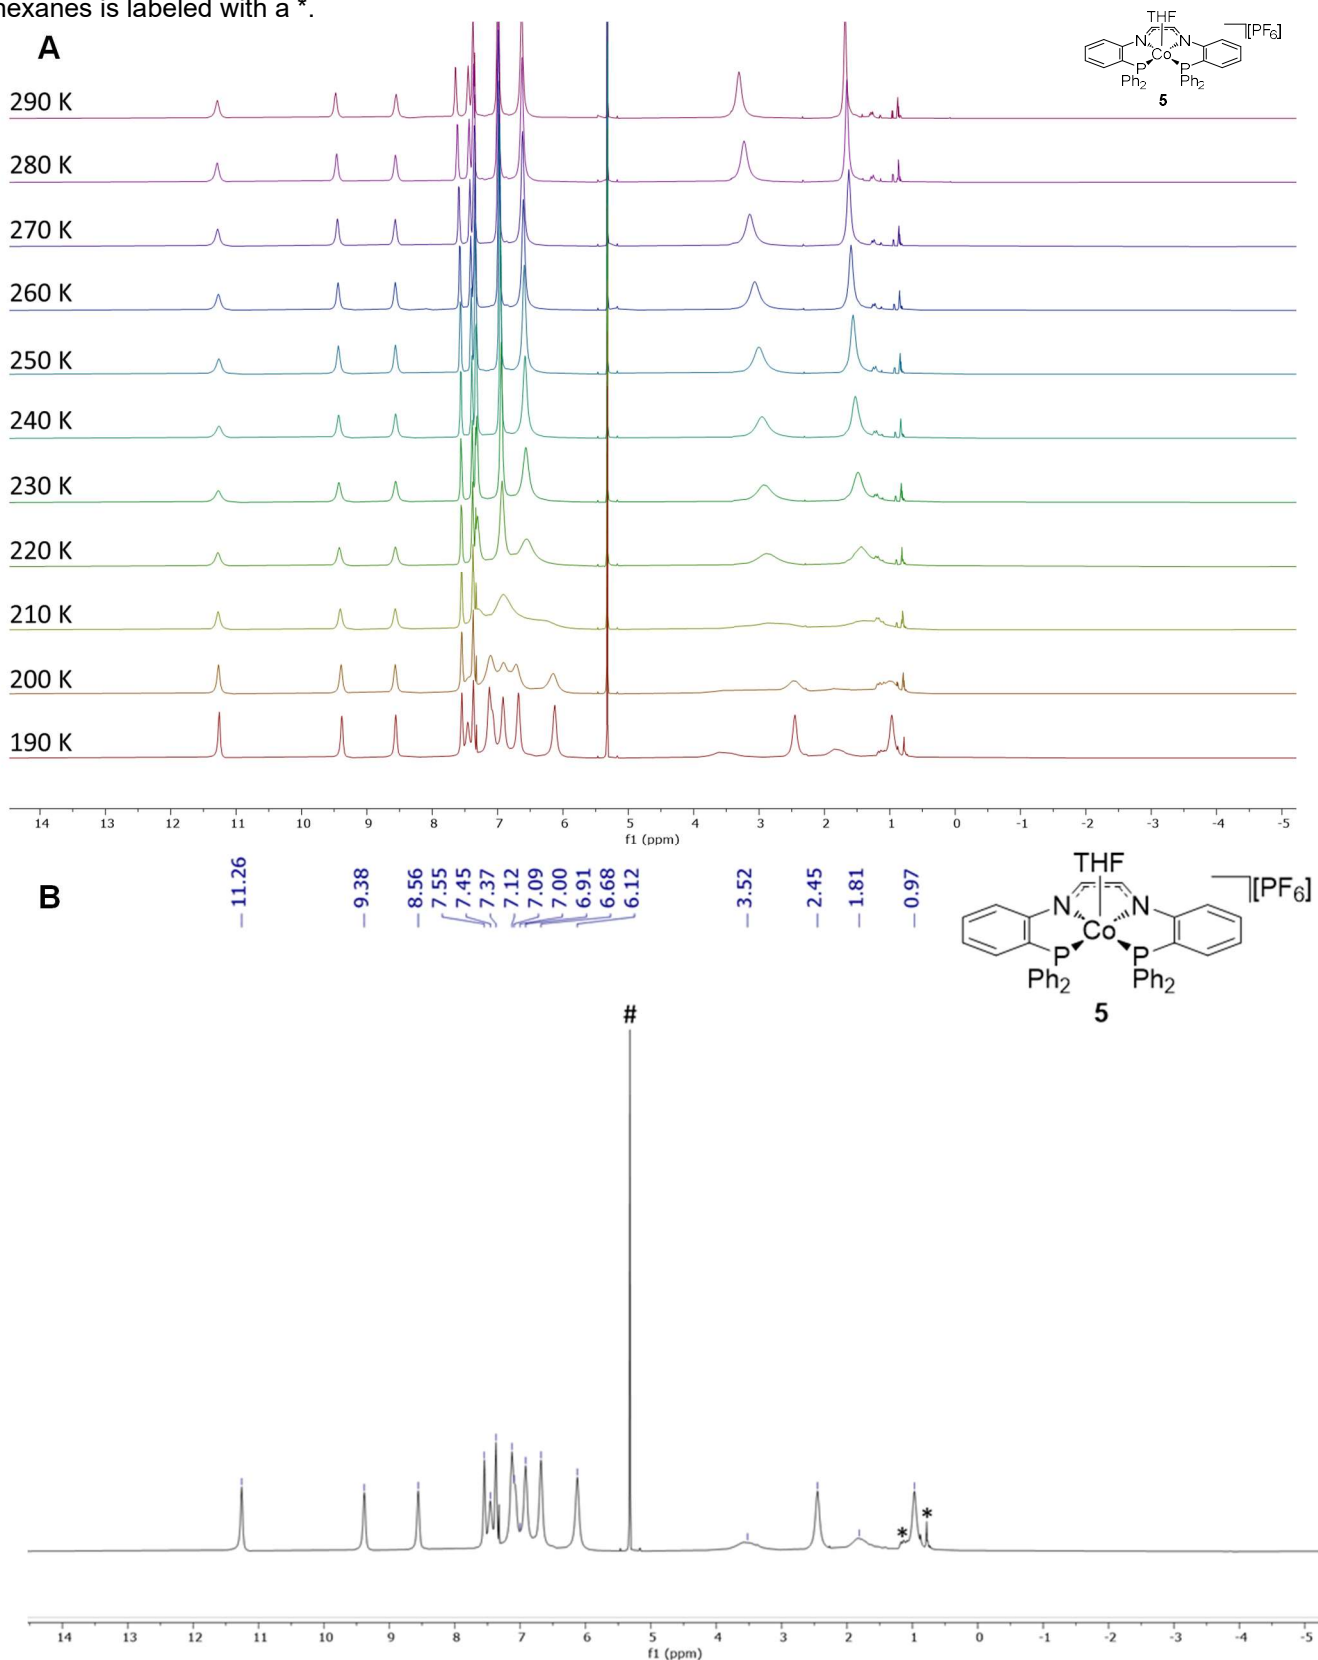



**Figure S19.**  $^1\text{H}$  NMR spectrum (400 MHz,  $\text{C}_6\text{D}_6$ ) after 4 h of  $\text{H}_2(\text{g})$  addition to **2**. Residual THF, hexanes, and grease are labeled with a \* and residual  $\text{C}_6\text{D}_5\text{H}$  is labeled with a #.

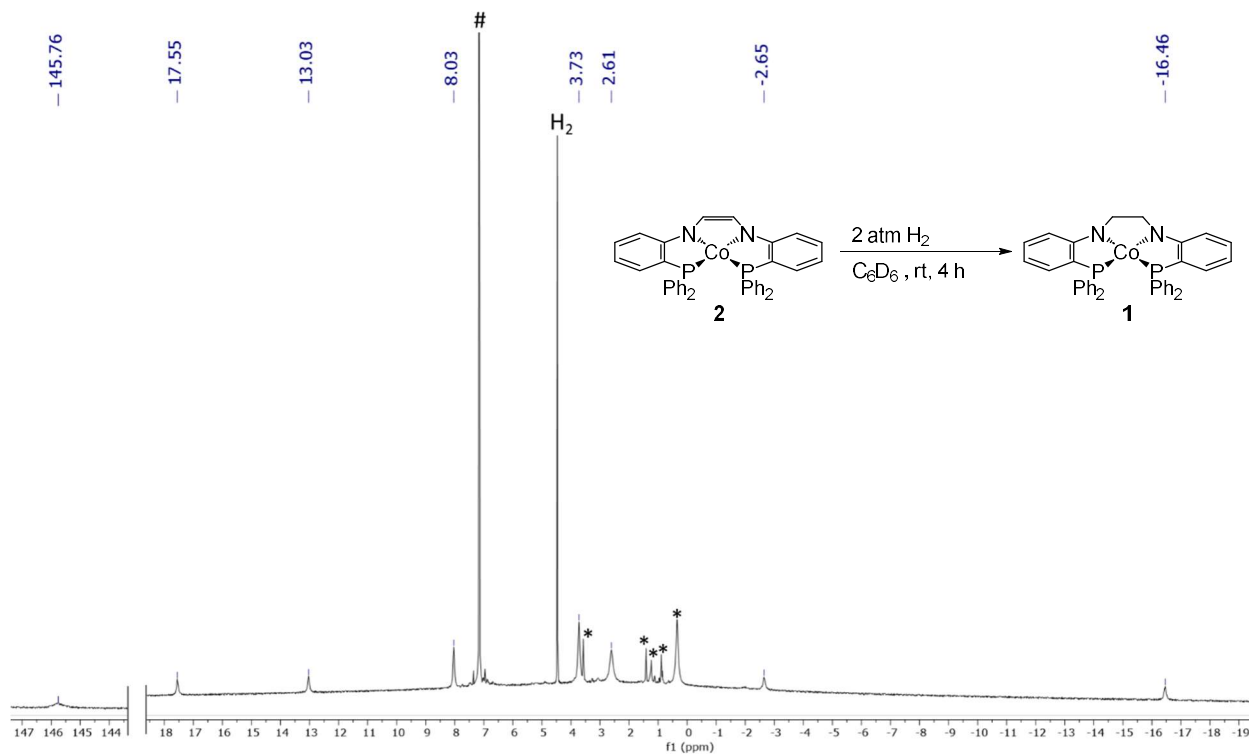

**Figure S20.**  $^1\text{H}$  NMR spectrum of **7** (400 MHz,  $\text{CD}_2\text{Cl}_2$ ). Stars denote residual solvent impurities ( $\text{CH}_2\text{Cl}_2$ , THF, and acetone). Residual  $\text{CHDCl}_2$  is denoted with a #.

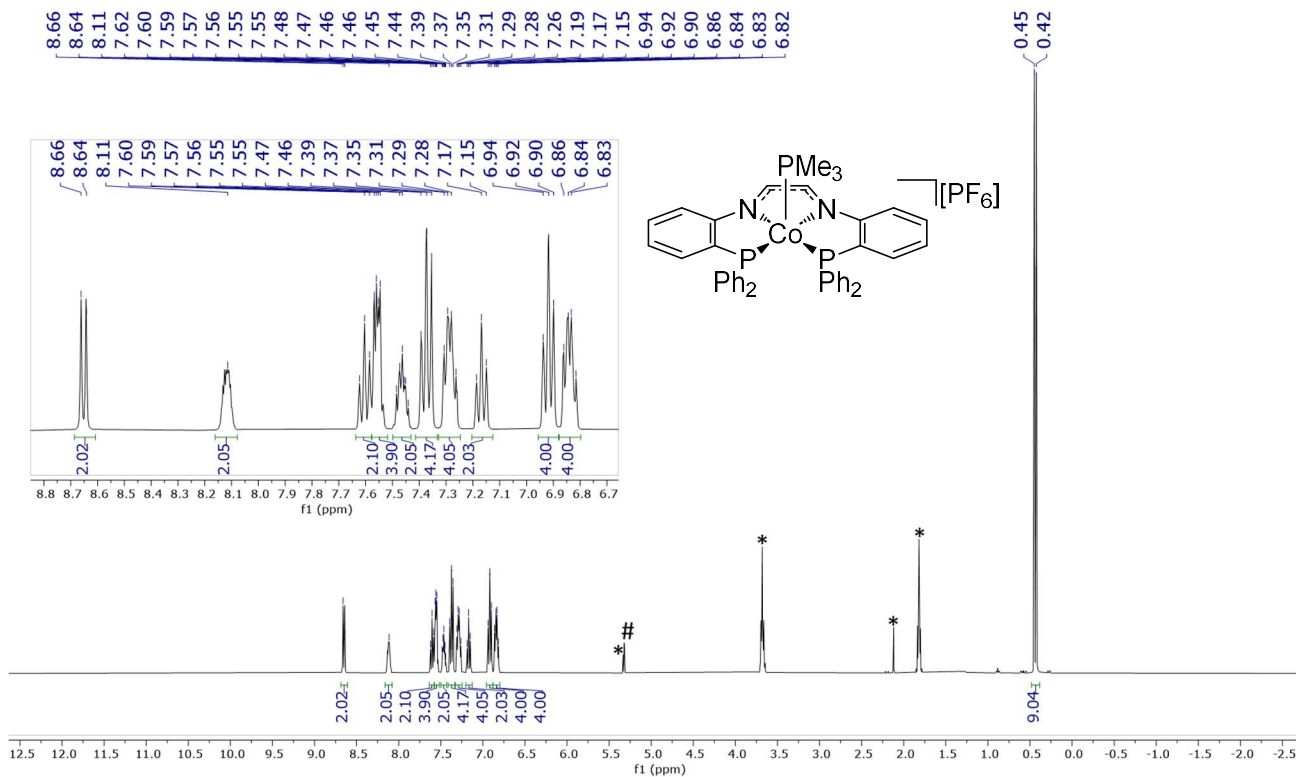

**Figure S21.**  $^{13}\text{C}\{^1\text{H}\}$  NMR spectrum of **7** (100 MHz,  $\text{CD}_2\text{Cl}_2$ ). Residual solvent impurities (THF and benzene) are labeled with a star. Residual  $\text{CD}_2\text{Cl}_2$  is denoted with a #.

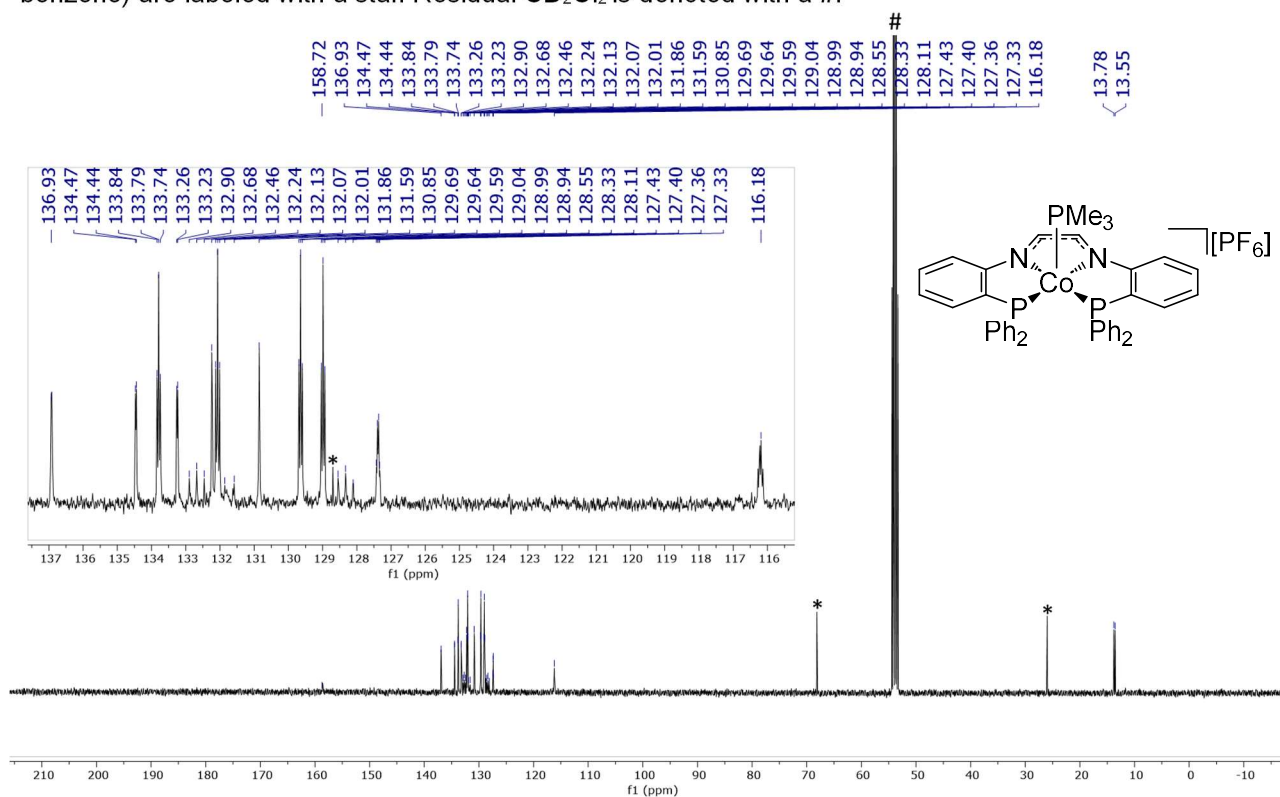

**Figure S22.**  $^{31}\text{P}\{^1\text{H}\}$  NMR spectrum of **7** (162 MHz,  $\text{CD}_2\text{Cl}_2$ ).

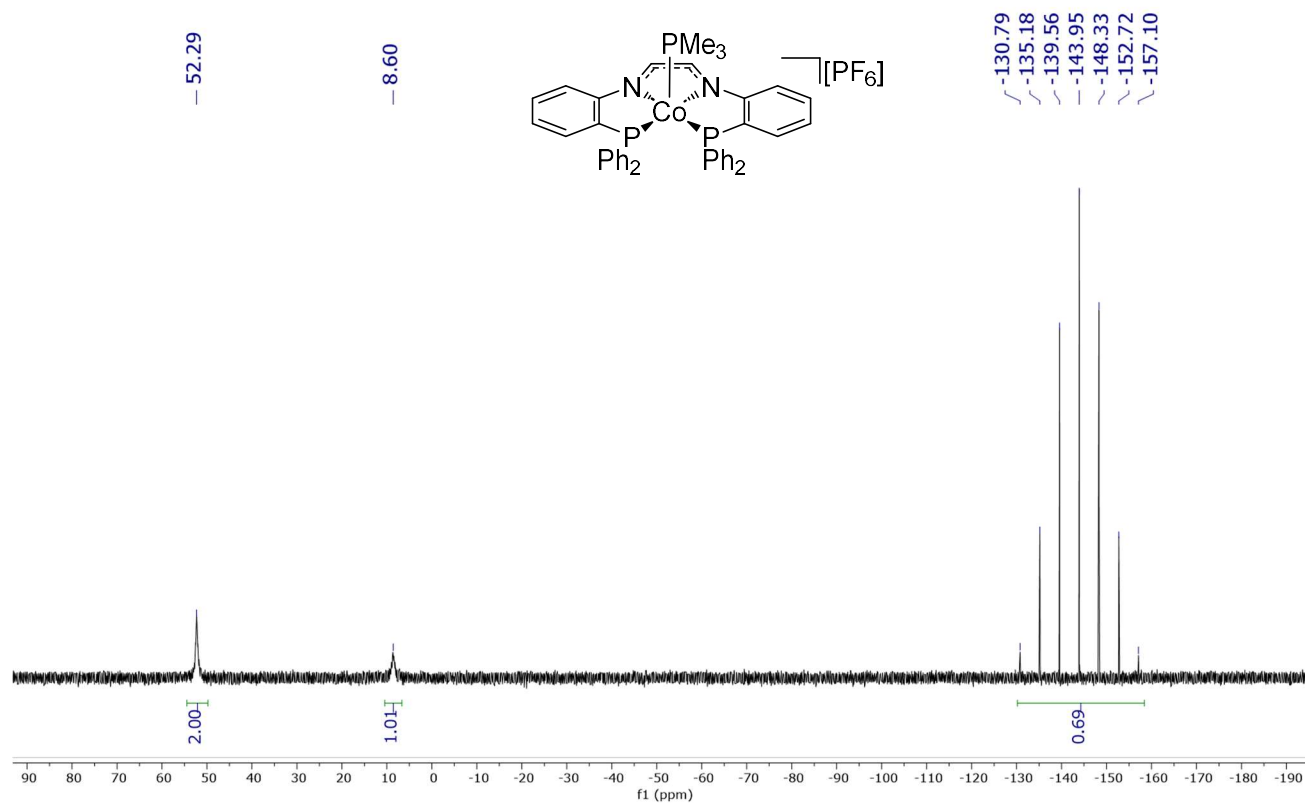

**Figure S23.**  $^{31}\text{P}\{^1\text{H}\}$  NMR (162 MHz) spectra of the attempted hydrogen atom abstraction from (PNCH<sub>2</sub>CH<sub>2</sub>NP)Ni (**1-Ni**). The top and bottom spectra were collected in C<sub>6</sub>D<sub>6</sub>, while the middle spectrum was collected in THF.

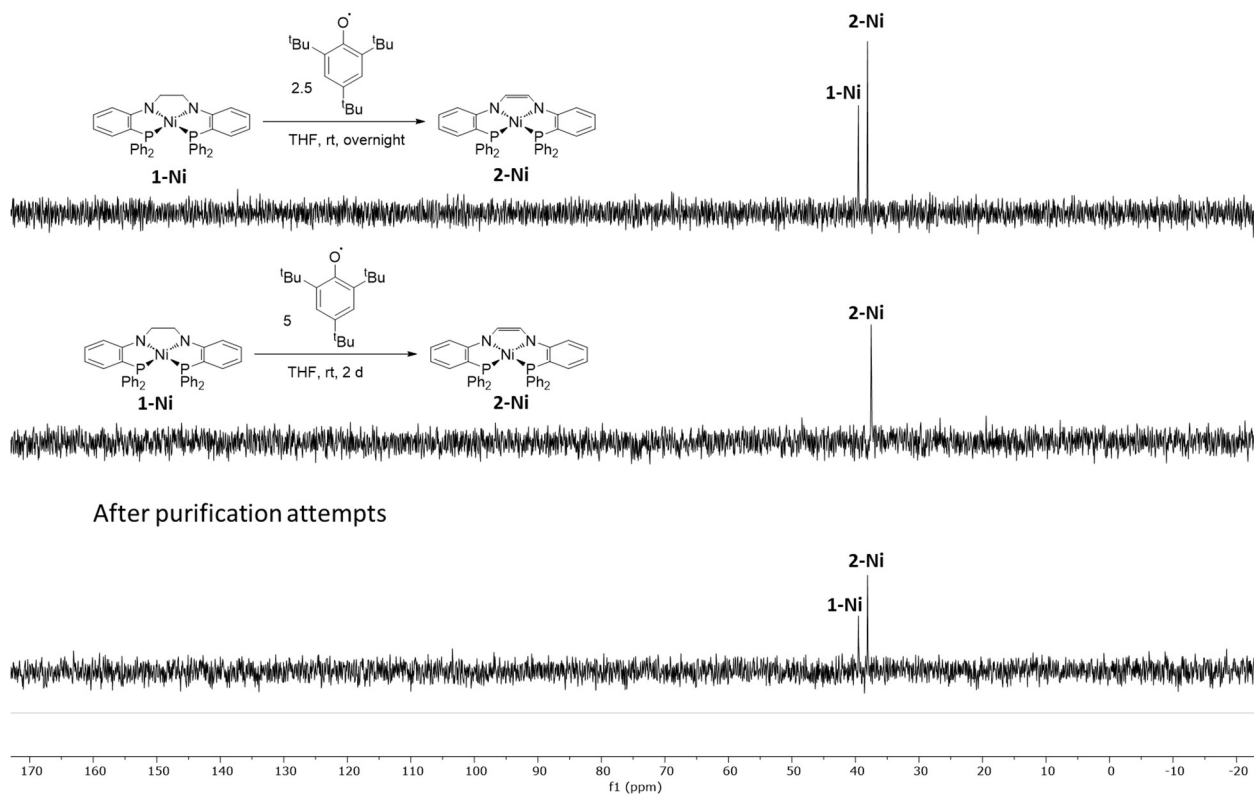

**Figure 24.**  $^1\text{H}$  NMR (400 MHz) in C<sub>6</sub>D<sub>6</sub> (left) and  $^{31}\text{P}\{^1\text{H}\}$  NMR (162 MHz) in C<sub>6</sub>D<sub>6</sub> (right) of the reaction between **2** and KBET<sub>3</sub>H. Residual CD<sub>5</sub>H is labeled with a # and residual THF is labeled with a \*.

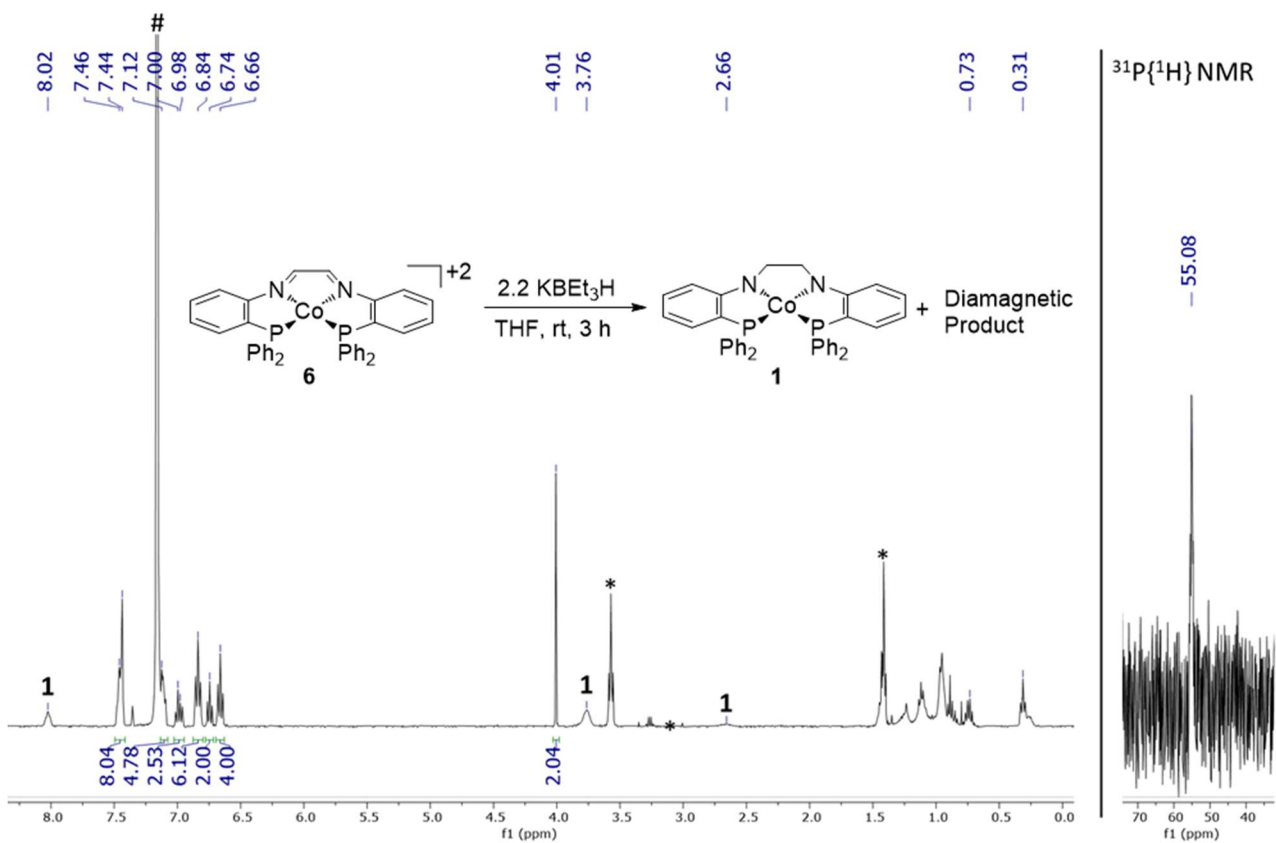

**Figure S25.**  $^1\text{H}$  NMR (400 MHz) spectra in  $\text{C}_6\text{D}_6$  (left) and  $^{31}\text{P}\{^1\text{H}\}$  NMR (162 MHz) spectra in  $\text{C}_6\text{D}_6$  (right) for the reaction between **2** and BuBr. The top spectra are of the crude reaction mixture, the middle spectra are of the hexanes extract, and the bottom spectra are of the PhF extract. Residual  $\text{C}_6\text{D}_5\text{H}$  is denoted with a # and residual THF is denoted with a \*.

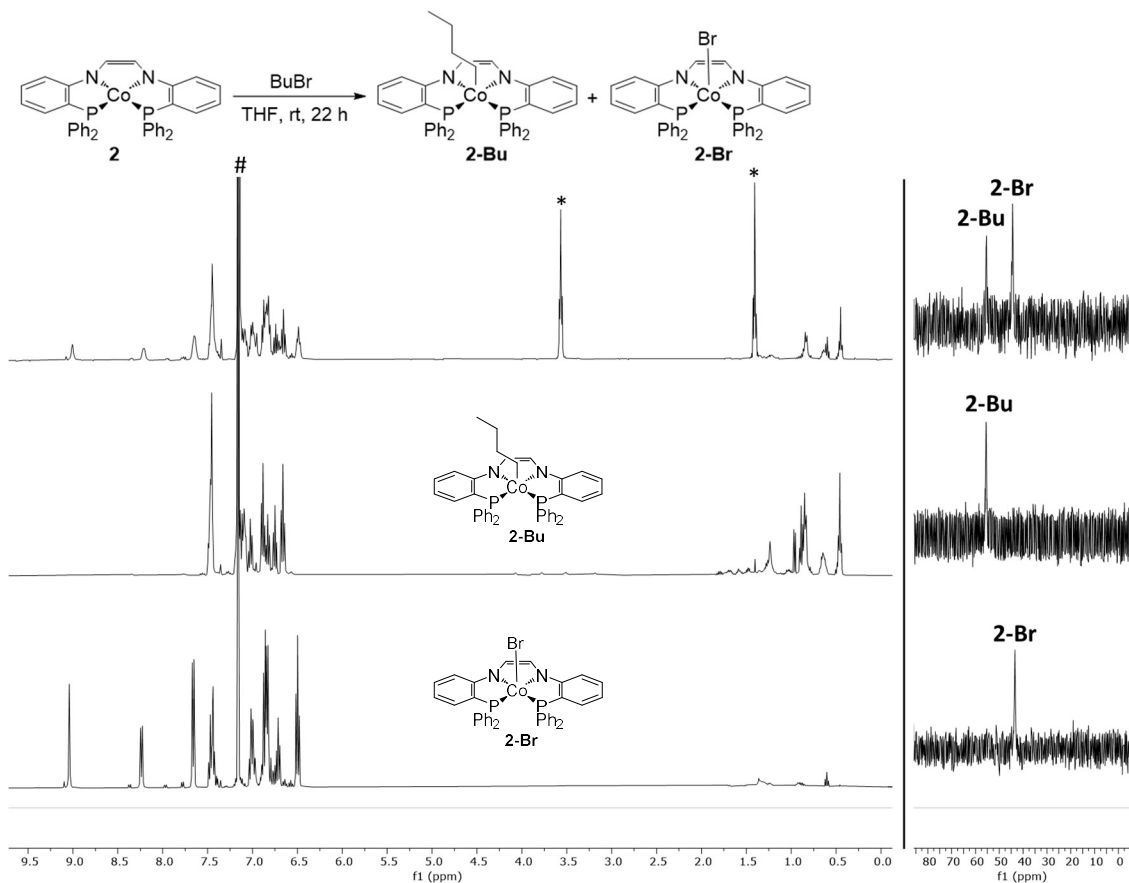

**Figure S26.** Cyclic voltammogram of  $(\text{PNCH}_2\text{CH}_2\text{NP})\text{Ni}$  (**1-Ni**).

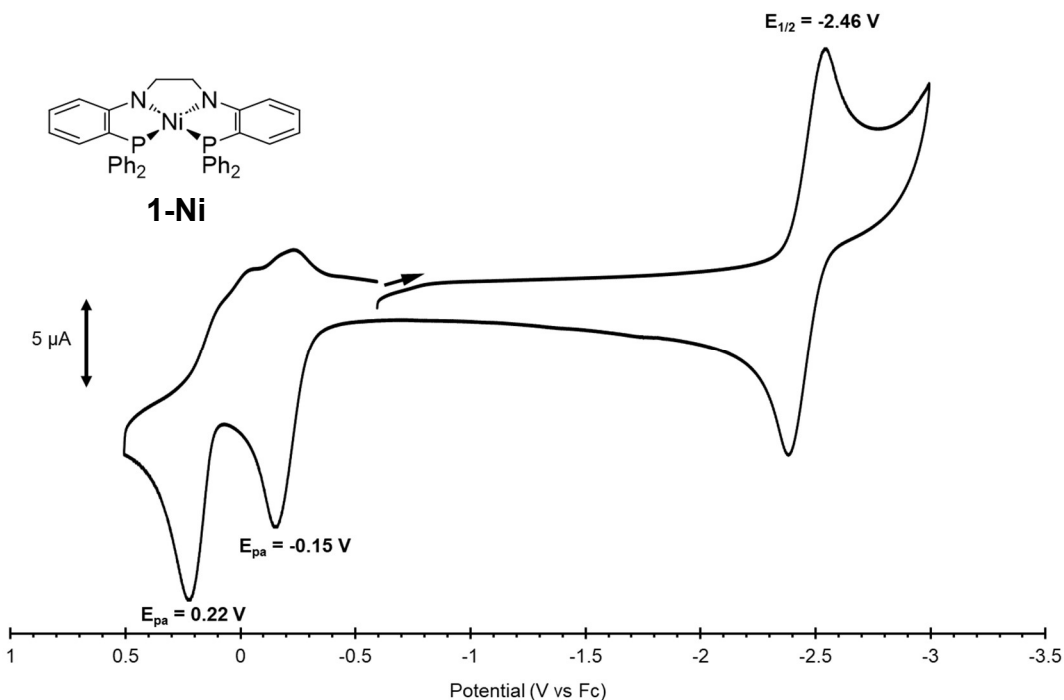

## Crystal Structures:

Figure S27. Fully labeled ellipsoid representation (50%) of 1.

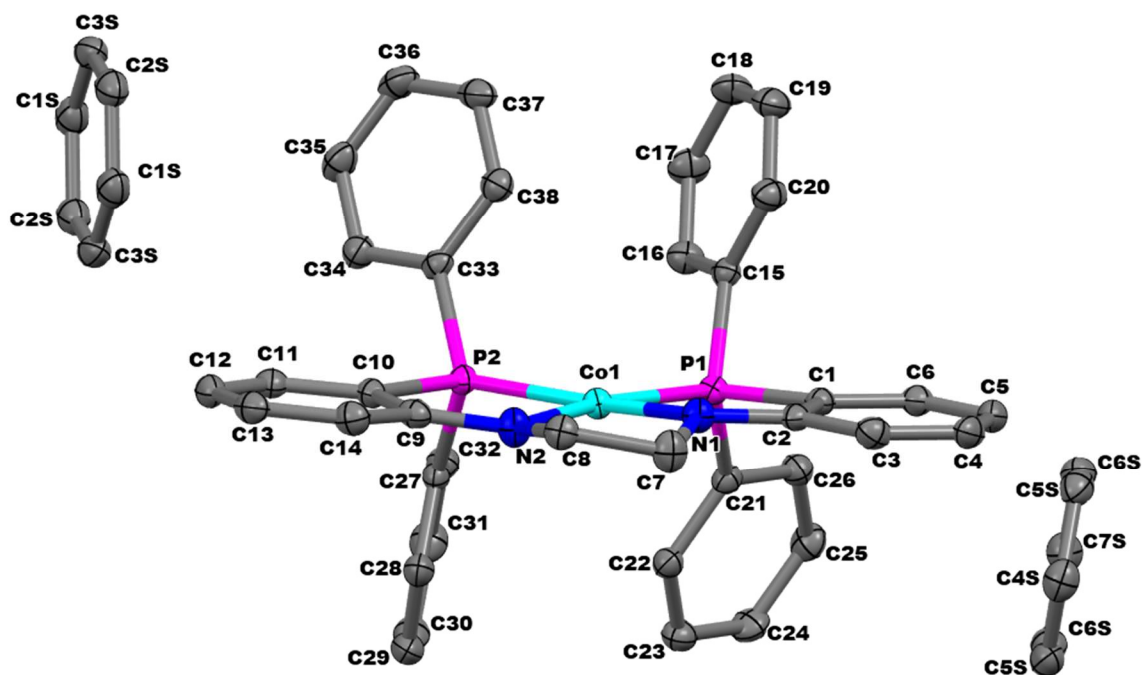

### Experimental Summary

The single crystal X-ray diffraction studies were carried out on a Bruker Kappa Photon III CPAD diffractometer equipped with Mo K $\alpha$  radiation ( $\lambda = 0.71073 \text{ \AA}$ ). A 0.103 x 0.054 x 0.047 mm piece of a brown block was mounted on a MiTeGen MicroMount with Paratone 24EX oil. Data were collected in a nitrogen gas stream at 100(2) K using  $\phi$  and  $\omega$  scans. Crystal-to-detector distance was 60 mm using variable exposure time (2-10 s) depending on  $\theta$  with a scan width of 1.0°. Data collection was 99.9% complete to 25.00° in  $\theta$  (0.83 Å). A total of 80489 reflections were collected covering the indices,  $-46 \leq h \leq 44$ ,  $-12 \leq k \leq 12$ ,  $-28 \leq l \leq 28$ . 7051 reflections were found to be symmetry independent, with a  $R_{\text{int}}$  of 0.0521. Indexing and unit cell refinement indicated a C-centered, monoclinic lattice. The space group was found to be  $C2/c$ . The data were integrated using the Bruker SAINT software program and scaled using the SADABS software program. Solution by dual-space method (SHELXT) produced a complete phasing model for refinement.

All nonhydrogen atoms were refined anisotropically by full-matrix least-squares (SHELXL-2014). All hydrogen atoms were placed using a riding model. Their positions were constrained relative to their parent atom using the appropriate HFIX command in SHELXL-2014. Crystallographic data are summarized in Table S1.

Figure S28. Fully labeled ellipsoid representation (50%) of 2.

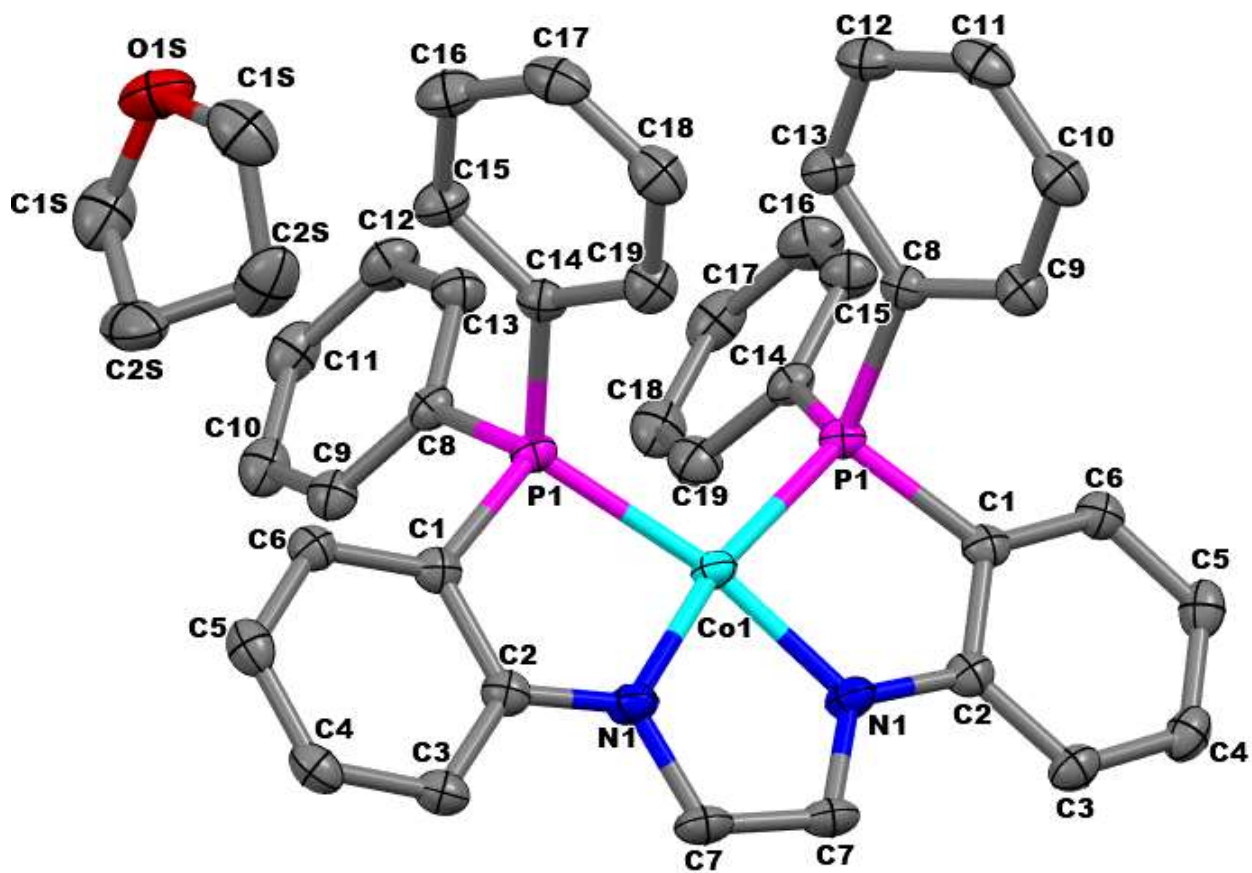

### Experimental Summary

The single crystal X-ray diffraction studies were carried out on a Bruker Kappa Photon III CPAD diffractometer equipped with Mo  $K_{\alpha}$  radiation ( $\lambda = 0.71073 \text{ \AA}$ ). A  $0.152 \times 0.084 \times 0.035 \text{ mm}$  piece of a reddish orange block was mounted on a MiTeGen MicroMount with Paratone 24EX oil. Data were collected in a nitrogen gas stream at  $100(2) \text{ K}$  using  $\phi$  and  $\omega$  scans. Crystal-to-detector distance was  $50 \text{ mm}$  using variable exposure time (2-5 s) depending on  $\theta$  with a scan width of  $1.0^{\circ}$ . Data collection was 99.6% complete to  $25.00^{\circ}$  in  $\theta$  ( $0.83 \text{ \AA}$ ). A total of 21081 reflections were collected covering the indices,  $-20 \leq h \leq 20$ ,  $-12 \leq k \leq 12$ ,  $-16 \leq l \leq 17$ . 3977 reflections were found to be symmetry independent, with a  $R_{\text{int}}$  of 0.0294. Indexing and unit cell refinement indicated a C-centered, monoclinic lattice. The space group was found to be  $C2$ . The data were integrated using the Bruker SAINT software program and scaled using the SADABS software program. Solution by dual-space method (SHELXT) produced a complete phasing model for refinement.

All nonhydrogen atoms were refined anisotropically by full-matrix least-squares (SHELXL-2014). All hydrogen atoms were placed using a riding model. Their positions were constrained relative to their parent atom using the appropriate HFIX command in SHELXL-2014. Crystallographic data are summarized in Table S1.



Figure S29. Fully labeled ellipsoid representation (50%) of 3.

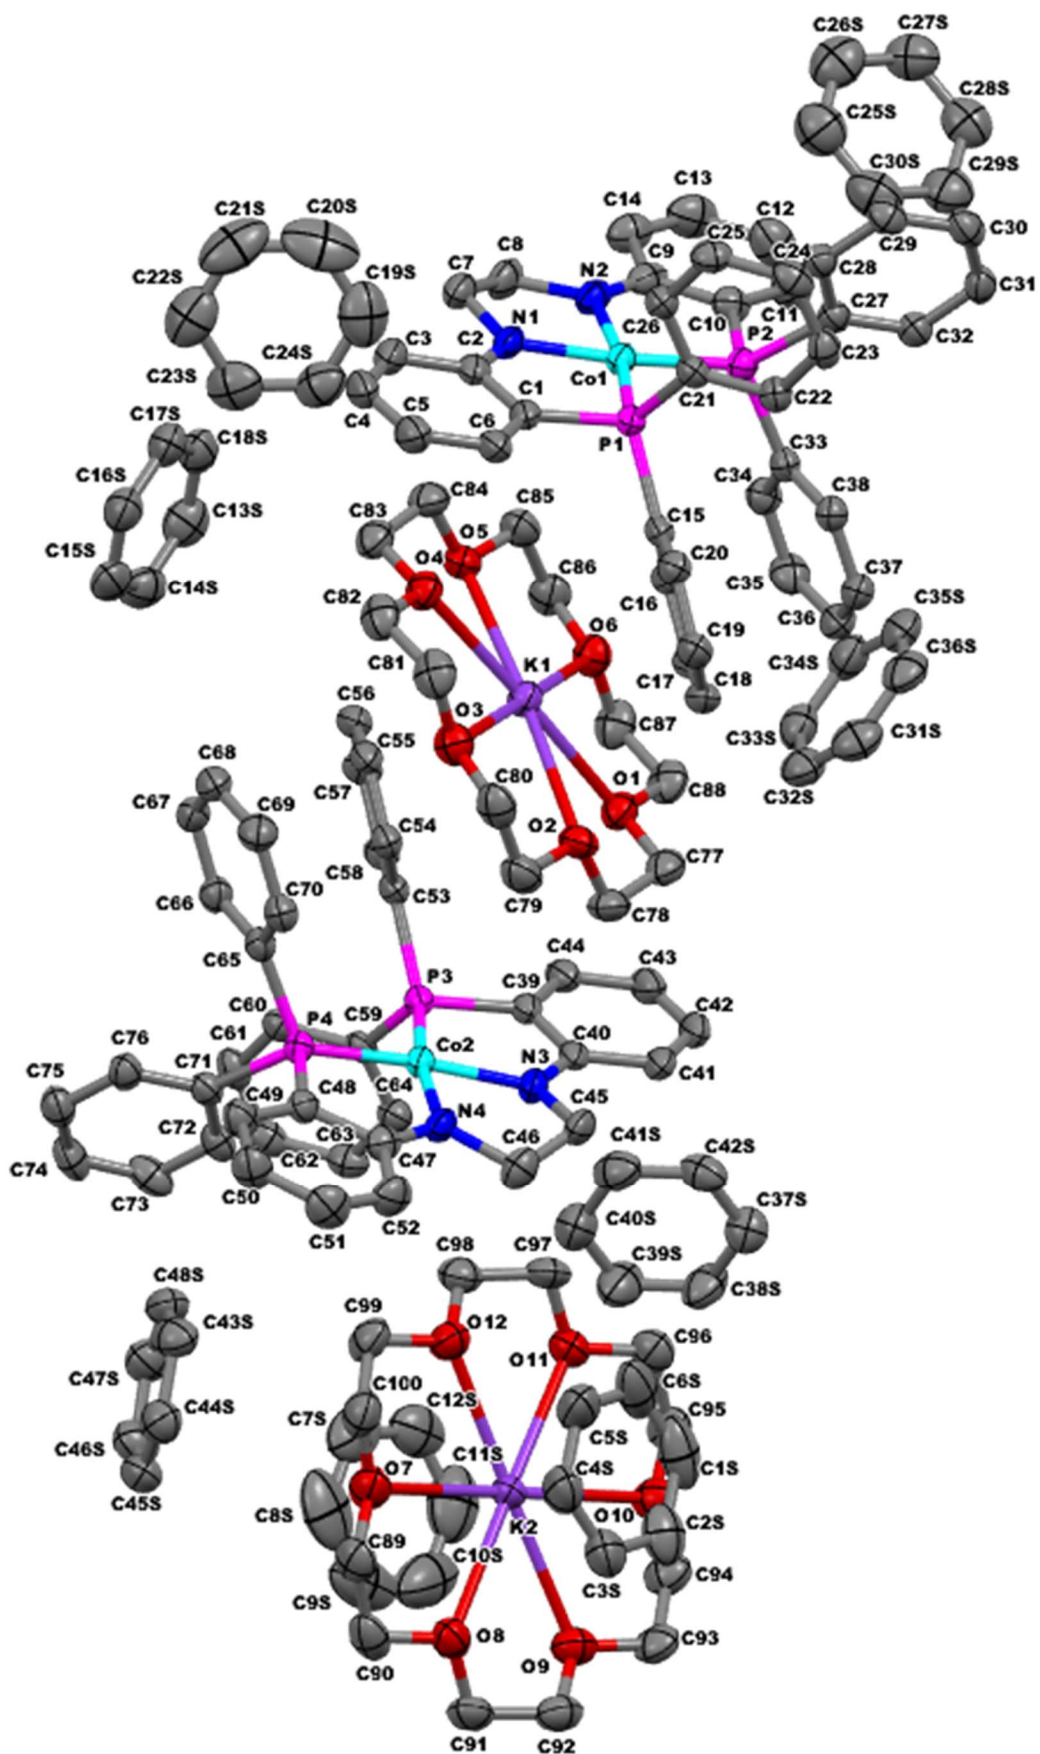

## **Experimental Summary**

The single crystal X-ray diffraction studies were carried out on a Bruker Kappa Photon III CPAD diffractometer equipped with Mo  $K_{\alpha}$  radiation ( $\lambda = 0.71073 \text{ \AA}$ ). A 0.184 x 0.172 x 0.124 mm piece of a red block was mounted on a MiTeGen MicroMount with Paratone 24EX oil. Data were collected in a nitrogen gas stream at 100(2) K using  $\phi$  and  $\omega$  scans. Crystal-to-detector distance was 80 mm using variable exposure time (1-20 s) depending on  $\theta$  with a scan width of  $0.75^{\circ}$ . Data collection was 99.9% complete to  $25.00^{\circ}$  in  $\theta$  ( $0.83 \text{ \AA}$ ). A total of 292204 reflections were collected covering the indices,  $-14 \leq h \leq 10$ ,  $-30 \leq k \leq 30$ ,  $-58 \leq l \leq 58$ . 26444 reflections were found to be symmetry independent, with a  $R_{\text{int}}$  of 0.0533. Indexing and unit cell refinement indicated a primitive, orthorhombic lattice. The space group was found to be  $P2_12_12_1$ . The data were integrated using the Bruker SAINT software program and scaled using the SADABS software program. Solution by dual-space method (SHELXT) produced a complete phasing model for refinement.

All nonhydrogen atoms were refined anisotropically by full-matrix least-squares (SHELXL-2014). All hydrogen atoms were placed using a riding model. Their positions were constrained relative to their parent atom using the appropriate HFIX command in SHELXL-2014. Crystallographic data are summarized in Table S2.



Figure S30. Fully labeled ellipsoid representation (50%) of 4.

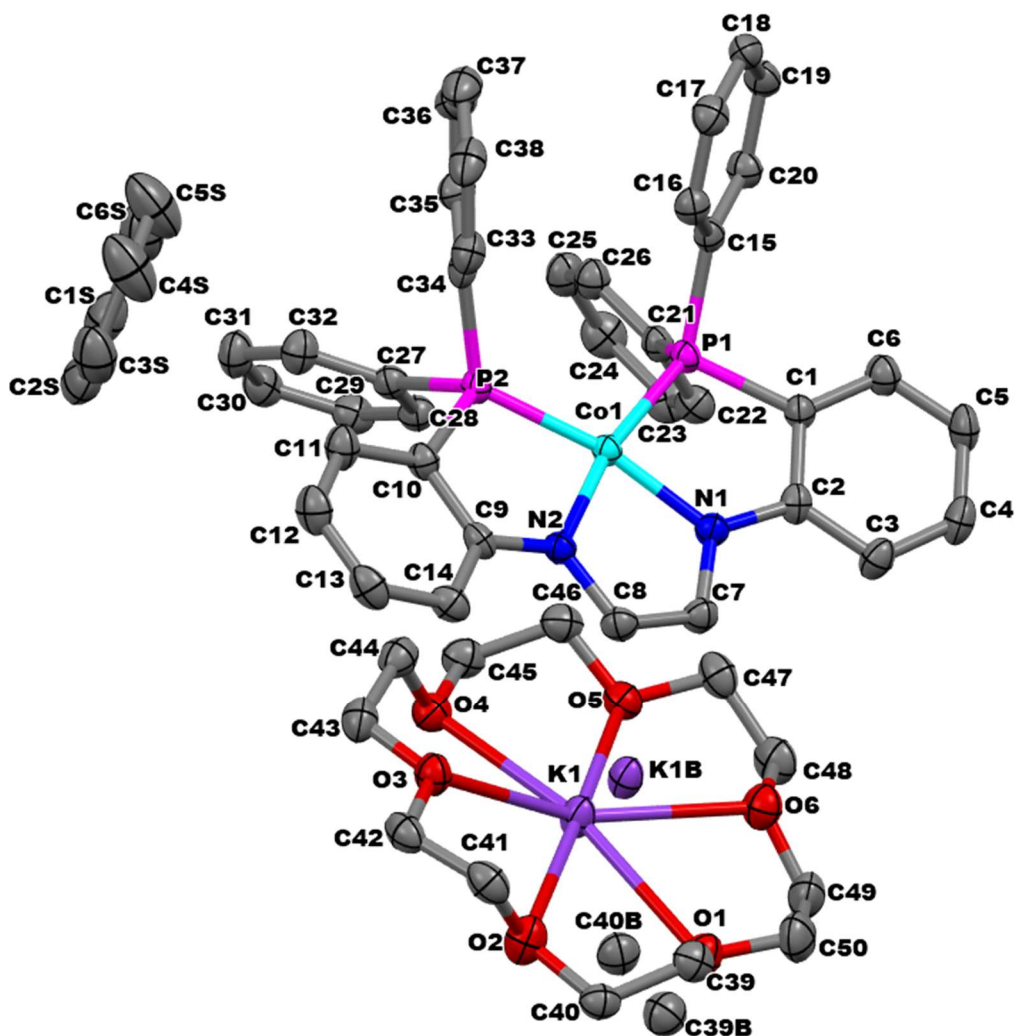

### Experimental Summary

The single crystal X-ray diffraction studies were carried out on a Bruker Kappa Photon III CPAD diffractometer equipped with Mo  $K_{\alpha}$  radiation ( $\lambda = 0.71073 \text{ \AA}$ ). A 0.132 x 0.086 x 0.054 mm piece of a brown block was mounted on a MiTeGen MicroMount with Paratone 24EX oil. Data were collected in a nitrogen gas stream at 100(2) K using  $\phi$  and  $\omega$  scans. Crystal-to-detector distance was 60 mm using variable exposure time (5-20 s) depending on  $\theta$  with a scan width of  $1.0^{\circ}$ . Data collection was 99.9% complete to  $25.00^{\circ}$  in  $\theta$  ( $0.83 \text{ \AA}$ ). A total of 120957 reflections were collected covering the indices,  $-13 \leq h \leq 13$ ,  $-17 \leq k \leq 17$ ,  $-22 \leq l \leq 22$ . 10186 reflections were found to be symmetry independent, with a  $R_{\text{int}}$  of 0.0707. Indexing and unit cell refinement indicated a primitive, triclinic lattice. The space group was found to be  $P-1$ . The data were integrated using the Bruker SAINT software program and scaled using the SADABS software program. Solution by dual-space method (SHELXT) produced a complete phasing model for refinement.

All nonhydrogen atoms were refined anisotropically by full-matrix least-squares (SHELXL-2014). All hydrogen atoms were placed using a riding model. Their positions were constrained relative to their parent atom using the appropriate HFIX command in SHELXL-2014. Crystallographic data are summarized in Table S2.

Figure S31. Fully labeled ellipsoid representation (50%) of 5.

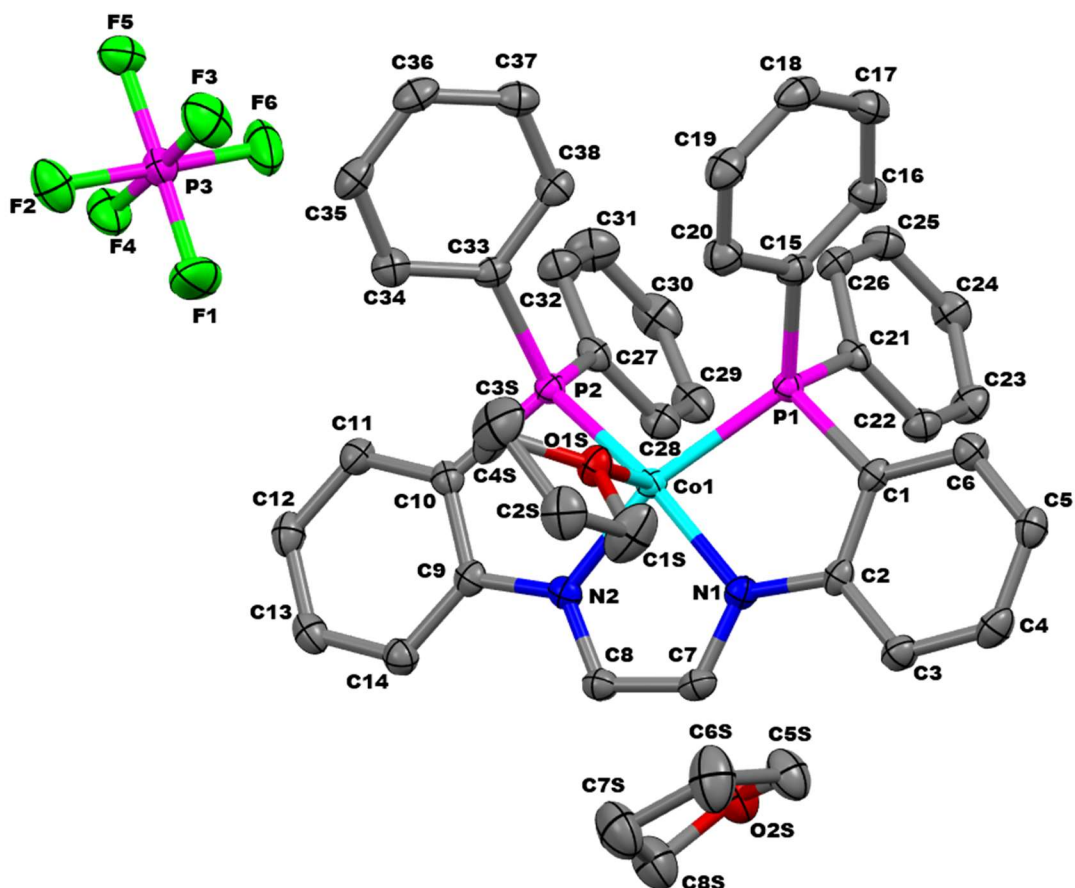

### Experimental Summary

The single crystal X-ray diffraction studies were carried out on a Bruker Kappa Photon III CPAD diffractometer equipped with Mo  $K_{\alpha}$  radiation ( $\lambda = 0.71073 \text{ \AA}$ ). A 0.110 x 0.098 x 0.040 mm piece of a purple block was mounted on a MiTeGen MicroMount with Paratone 24EX oil. Data were collected in a nitrogen gas stream at 100(2) K using  $\phi$  and  $\omega$  scans. Crystal-to-detector distance was 70 mm using variable exposure time (1-10 s) depending on  $\theta$  with a scan width of  $0.75^{\circ}$ . Data collection was 99.9% complete to  $25.00^{\circ}$  in  $\theta$  ( $0.83 \text{ \AA}$ ). A total of 137217 reflections were collected covering the indices,  $-13 \leq h \leq 13$ ,  $-16 \leq k \leq 16$ ,  $-17 \leq l \leq 17$ . 8507 reflections were found to be symmetry independent, with a  $R_{\text{int}}$  of 0.0847. Indexing and unit cell refinement indicated a primitive, monoclinic lattice. The space group was found to be  $P2_1$ . The data were integrated using the Bruker SAINT software program and scaled using the TWINABS software program. Solution by dual-space method (SHELXT) produced a complete phasing model for refinement.

All nonhydrogen atoms were refined anisotropically by full-matrix least-squares (SHELXL-2014). All hydrogen atoms were placed using a riding model. Their positions were constrained relative to their parent atom using the appropriate HFIX command in SHELXL-2014. Crystallographic data are summarized in Table S3.

**Figure S32.** Fully labeled ellipsoid representation (50%) of **6**.

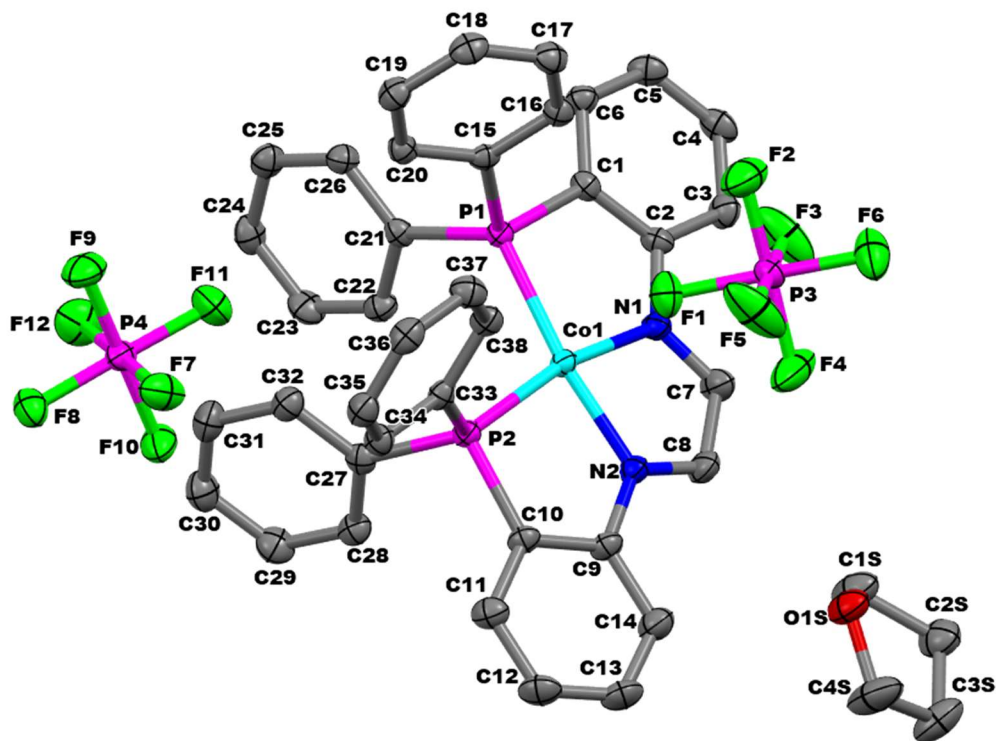

### **Experimental Summary**

The single crystal X-ray diffraction studies were carried out on a Bruker Kappa Photon III CPAD diffractometer equipped with Mo  $K_{\alpha}$  radiation ( $\lambda = 0.71073 \text{ \AA}$ ). A 0.146 x 0.137 x 0.057 mm piece of a green block was mounted on a MiTeGen MicroMount with Paratone 24EX oil. Data were collected in a nitrogen gas stream at 100(2) K using  $\phi$  and  $\omega$  scans. Crystal-to-detector distance was 60 mm using variable exposure time (1-5s) depending on  $\theta$  with a scan width of  $1.0^{\circ}$ . Data collection was 99.9% complete to  $25.00^{\circ}$  in  $\theta$  ( $0.83 \text{ \AA}$ ). A total of 93637 reflections were collected covering the indices,  $-19 \leq h \leq 19$ ,  $-17 \leq k \leq 17$ ,  $-23 \leq l \leq 23$ . 8426 reflections were found to be symmetry independent, with a  $R_{\text{int}}$  of 0.0588. Indexing and unit cell refinement indicated a primitive, monoclinic lattice. The space group was found to be  $Pca2_1$ . The data were integrated using the Bruker SAINT software program and scaled using the SADABS software program. Solution by dual-space method (SHELXT) produced a complete phasing model for refinement.

All nonhydrogen atoms were refined anisotropically by full-matrix least-squares (SHELXL-2014). All hydrogen atoms were placed using a riding model. Their positions were constrained relative to their parent atom using the appropriate HFIX command in SHELXL-2014. Crystallographic data are summarized in Table S3.

Figure S33. Fully labeled ellipsoid representation (50%) of 7.

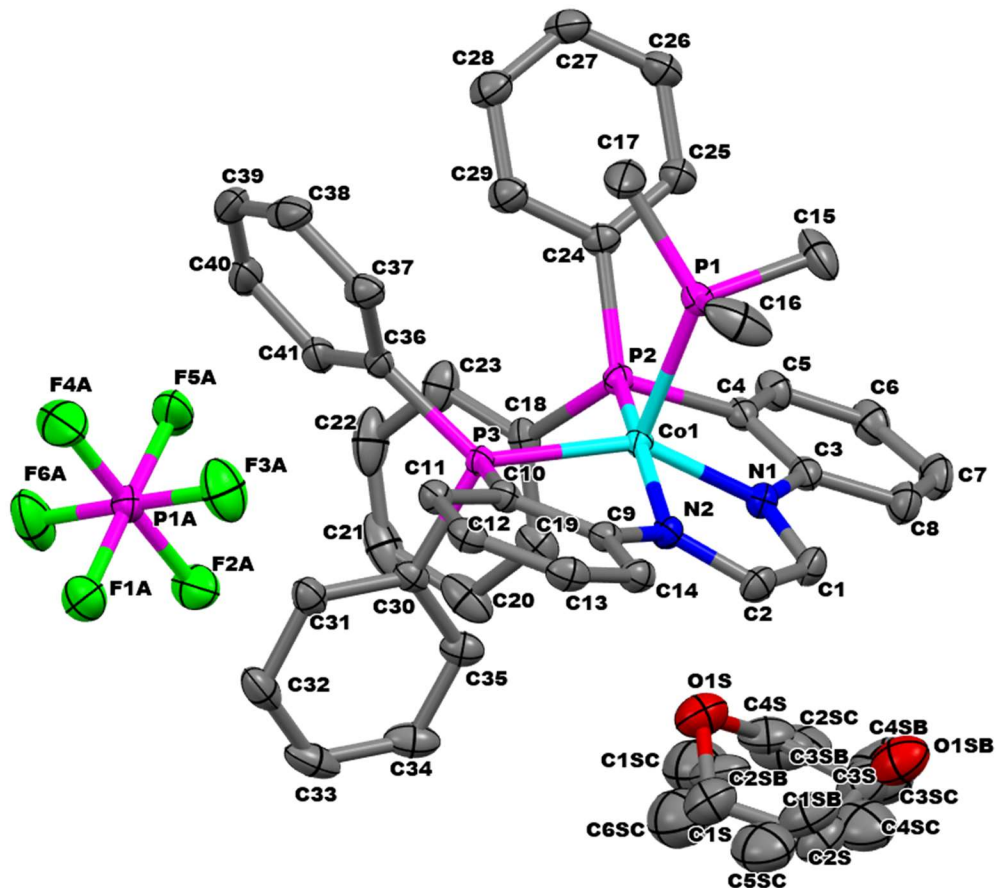

### Experimental Summary

The single crystal X-ray diffraction studies were carried out on a Bruker Kappa Photon III CPAD diffractometer equipped with Mo  $K_{\alpha}$  radiation ( $\lambda = 0.71073 \text{ \AA}$ ). A  $0.132 \times 0.086 \times 0.084$  mm piece of a red block was mounted on a MiTeGen MicroMount with Paratone 24EX oil. Data were collected in a nitrogen gas stream at  $100(2) \text{ K}$  using  $\phi$  and  $\omega$  scans. Crystal-to-detector distance was 60 mm using variable exposure time (1s-2s) depending on  $\theta$  with a scan width of  $1.0^{\circ}$ . Data collection was 99.9% complete to  $25.00^{\circ}$  in  $\theta$  ( $0.83 \text{ \AA}$ ). A total of 96743 reflections were collected covering the indices,  $-14 \leq h \leq 14$ ,  $-15 \leq k \leq 15$ ,  $-19 \leq l \leq 19$ . 8804 reflections were found to be symmetry independent, with a  $R_{\text{int}}$  of 0.0404. Indexing and unit cell refinement indicated a primitive, triclinic lattice. The space group was found to be  $P-1$ . The data were integrated using the Bruker SAINT software program and scaled using the SADABS software program. Solution by dual-space method (SHELXT) produced a complete phasing model for refinement.

All nonhydrogen atoms were refined anisotropically by full-matrix least-squares (SHELXL-2014). All hydrogen atoms were placed using a riding model. Their positions were constrained relative to their parent atom using the appropriate HFIX command in SHELXL-2014. Crystallographic data are summarized in Table S4.

## Crystal Structure Refinement Data

**Table S1.** Crystal data and structure refinement for **1** and **2**.

|                                               | <b>1</b> •C <sub>6</sub> H <sub>6</sub>                                                         | <b>2</b> •THF                                                                                     |
|-----------------------------------------------|-------------------------------------------------------------------------------------------------|---------------------------------------------------------------------------------------------------|
| CCDC number                                   | 2354342                                                                                         | 2354341                                                                                           |
| Empirical Formula                             | C <sub>44</sub> H <sub>38</sub> CoN <sub>2</sub> P <sub>2</sub>                                 | C <sub>42</sub> H <sub>38</sub> CoN <sub>2</sub> OP <sub>2</sub>                                  |
| Molecular Formula                             | C <sub>38</sub> H <sub>32</sub> CoN <sub>2</sub> P <sub>2</sub> , C <sub>6</sub> H <sub>6</sub> | C <sub>38</sub> H <sub>30</sub> CoN <sub>2</sub> P <sub>2</sub> , C <sub>4</sub> H <sub>8</sub> O |
| Formula Weight (g/mol)                        | 715.63                                                                                          | 707.61                                                                                            |
| Temperature (K)                               | 100.0                                                                                           | 100.0                                                                                             |
| Wavelength (Å)                                | 0.71073                                                                                         | 0.71073                                                                                           |
| Crystal System                                | Monoclinic                                                                                      | Monoclinic                                                                                        |
| Space Group                                   | C2/c                                                                                            | C2                                                                                                |
| a (Å)                                         | 37.0504(12)                                                                                     | 15.4283(9)                                                                                        |
| b (Å)                                         | 9.6501(4)                                                                                       | 9.7434(5)                                                                                         |
| c (Å)                                         | 23.1185(8)                                                                                      | 12.9567(8)                                                                                        |
| α (°)                                         | 90                                                                                              | 90                                                                                                |
| β (°)                                         | 123.2110(10)                                                                                    | 120.359(2)                                                                                        |
| γ (°)                                         | 90                                                                                              | 90                                                                                                |
| Volume (Å <sup>3</sup> )                      | 6915.6(4)                                                                                       | 1680.63(17)                                                                                       |
| Z                                             | 8                                                                                               | 2                                                                                                 |
| Density (calculated)<br>(g/cm <sup>3</sup> )  | 1.375                                                                                           | 1.398                                                                                             |
| Absorption Coefficient<br>(mm <sup>-1</sup> ) | 0.625                                                                                           | 0.644                                                                                             |
| F(000)                                        | 2984                                                                                            | 738                                                                                               |
| Crystal Size (mm <sup>3</sup> )               | 0.103 x 0.054 x 0.047                                                                           | 0.152 x 0.084 x 0.035                                                                             |
| Crystal color, habit                          | brown block                                                                                     | reddish orange block                                                                              |
| Final R indices<br>[I > 2σ(I)]                | R <sub>1</sub> = 0.0289, wR <sub>2</sub> = 0.0709                                               | R <sub>1</sub> = 0.0273, wR <sub>2</sub> = 0.0622                                                 |
| R indices (all data)                          | R <sub>1</sub> = 0.0371, wR <sub>2</sub> = 0.0760                                               | R <sub>1</sub> = 0.0294, wR <sub>2</sub> = 0.0632                                                 |

**Table S2.** Crystal data and structure refinement for **3** and **4**.

|                                               | <b>3•4C<sub>6</sub>H<sub>6</sub></b>                                                                                                                     | <b>4•C<sub>6</sub>H<sub>6</sub></b>                                                                             |
|-----------------------------------------------|----------------------------------------------------------------------------------------------------------------------------------------------------------|-----------------------------------------------------------------------------------------------------------------|
| CCDC Number                                   | 2354345                                                                                                                                                  | 2354344                                                                                                         |
| Empirical Formula                             | C <sub>74</sub> H <sub>80</sub> CoKN <sub>2</sub> O <sub>6</sub> P <sub>2</sub>                                                                          | C <sub>56</sub> H <sub>60</sub> CoKN <sub>2</sub> O <sub>6</sub> P <sub>2</sub>                                 |
| Molecular Formula                             | C <sub>38</sub> H <sub>32</sub> CoN <sub>2</sub> P <sub>2</sub> , C <sub>12</sub> H <sub>24</sub> KO <sub>6</sub> ,<br>4(C <sub>6</sub> H <sub>6</sub> ) | C <sub>50</sub> H <sub>54</sub> CoKN <sub>2</sub> O <sub>6</sub> P <sub>2</sub> , C <sub>6</sub> H <sub>6</sub> |
| Formula Weight (g/mol)                        | 1253.37                                                                                                                                                  | 1017.03                                                                                                         |
| Temperature (K)                               | 100.0                                                                                                                                                    | 100.0                                                                                                           |
| Wavelength (Å)                                | 0.71073                                                                                                                                                  | 0.71073                                                                                                         |
| Crystal System                                | Orthorhombic                                                                                                                                             | Triclinic                                                                                                       |
| Space Group                                   | <i>P</i> 2 <sub>1</sub> 2 <sub>1</sub> 2 <sub>1</sub>                                                                                                    | <i>P</i> -1                                                                                                     |
| a (Å)                                         | 11.2827(5)                                                                                                                                               | 11.1913(4)                                                                                                      |
| b (Å)                                         | 24.3783(12)                                                                                                                                              | 13.9843(6)                                                                                                      |
| c (Å)                                         | 46.956(2)                                                                                                                                                | 17.7609(8)                                                                                                      |
| α (°)                                         | 90                                                                                                                                                       | 76.6020(10)                                                                                                     |
| β (°)                                         | 90                                                                                                                                                       | 83.3960(10)                                                                                                     |
| γ (°)                                         | 90                                                                                                                                                       | 67.3580(10)                                                                                                     |
| Volume (Å <sup>3</sup> )                      | 12915.5(11)                                                                                                                                              | 2494.55(18)                                                                                                     |
| Z                                             | 8                                                                                                                                                        | 2                                                                                                               |
| Density (calculated)<br>(g/cm <sup>3</sup> )  | 1.289                                                                                                                                                    | 1.354                                                                                                           |
| Absorption Coefficient<br>(mm <sup>-1</sup> ) | 0.435                                                                                                                                                    | 0.545                                                                                                           |
| F(000)                                        | 5296                                                                                                                                                     | 1068                                                                                                            |
| Crystal Size (mm <sup>3</sup> )               | 0.184 x 0.172 x 0.124                                                                                                                                    | 0.132 x 0.086 x 0.054                                                                                           |
| Crystal color, habit                          | Red block                                                                                                                                                | Brown block                                                                                                     |
| Final R indices<br>[I > 2σ(I)]                | R <sub>1</sub> = 0.0431, wR <sub>2</sub> = 0.1093                                                                                                        | R <sub>1</sub> = 0.0393, wR <sub>2</sub> = 0.0897                                                               |
| R indices (all data)                          | R <sub>1</sub> = 0.0544, wR <sub>2</sub> = 0.1181                                                                                                        | R <sub>1</sub> = 0.0626, wR <sub>2</sub> = 0.1011                                                               |

**Table S3.** Crystal data and structure refinement for **5** and **6**.

|                                               | <b>5</b> •THF                                                                                                        | <b>6</b> •THF                                                                                                          |
|-----------------------------------------------|----------------------------------------------------------------------------------------------------------------------|------------------------------------------------------------------------------------------------------------------------|
| CCDC Number                                   | 2354340                                                                                                              | 2354343                                                                                                                |
| Empirical Formula                             | C <sub>46</sub> H <sub>46</sub> CoF <sub>6</sub> N <sub>2</sub> O <sub>2</sub> P <sub>3</sub>                        | C <sub>42</sub> H <sub>38</sub> CoF <sub>12</sub> N <sub>2</sub> OP <sub>4</sub>                                       |
| Molecular Formula                             | C <sub>42</sub> H <sub>38</sub> CoN <sub>2</sub> OP <sub>2</sub> , F <sub>6</sub> P, C <sub>4</sub> H <sub>8</sub> O | C <sub>38</sub> H <sub>30</sub> CoN <sub>2</sub> P <sub>2</sub> , 2(F <sub>6</sub> P), C <sub>4</sub> H <sub>8</sub> O |
| Formula Weight (g/mol)                        | 924.69                                                                                                               | 997.55                                                                                                                 |
| Temperature (K)                               | 100.0                                                                                                                | 100.0                                                                                                                  |
| Wavelength (Å)                                | 0.71073                                                                                                              | 0.71073                                                                                                                |
| Crystal System                                | Monoclinic                                                                                                           | Orthorhombic                                                                                                           |
| Space Group                                   | <i>P2</i> <sub>1</sub>                                                                                               | <i>Pca2</i> <sub>1</sub>                                                                                               |
| a (Å)                                         | 10.8969(4)                                                                                                           | 15.4595(4)                                                                                                             |
| b (Å)                                         | 13.5727(5)                                                                                                           | 14.3076(4)                                                                                                             |
| c (Å)                                         | 14.1536(6)                                                                                                           | 18.6069(6)                                                                                                             |
| α (°)                                         | 90                                                                                                                   | 90                                                                                                                     |
| β (°)                                         | 96.740(2)                                                                                                            | 90                                                                                                                     |
| γ (°)                                         | 90                                                                                                                   | 90                                                                                                                     |
| Volume (Å <sup>3</sup> )                      | 2078.86(14)                                                                                                          | 4115.6                                                                                                                 |
| Z                                             | 2                                                                                                                    | 4                                                                                                                      |
| Density (calculated)<br>(g/cm <sup>3</sup> )  | 1.477                                                                                                                | 1.610                                                                                                                  |
| Absorption Coefficient<br>(mm <sup>-1</sup> ) | 0.598                                                                                                                | 0.665                                                                                                                  |
| F(000)                                        | 956                                                                                                                  | 2028                                                                                                                   |
| Crystal Size (mm <sup>3</sup> )               | 0.110 x 0.098 x 0.040                                                                                                | 0.146 x 0.137 x 0.057                                                                                                  |
| Crystal color, habit                          | Purple block                                                                                                         | Green block                                                                                                            |
| Final R indices<br>[I > 2σ(I)]                | R <sub>1</sub> = 0.0360, wR <sub>2</sub> = 0.0843                                                                    | R <sub>1</sub> = 0.0290, wR <sub>2</sub> = 0.0662                                                                      |
| R indices (all data)                          | R <sub>1</sub> = 0.0417, wR <sub>2</sub> = 0.0879                                                                    | R <sub>1</sub> = 0.0350, wR <sub>2</sub> = 0.0697                                                                      |

**Table S4.** Crystal data and structure refinement for **7**.

|                                             | <b>7</b> •THF <sub>0.79</sub> (C <sub>6</sub> H <sub>6</sub> ) <sub>0.216</sub>                                                                                   |
|---------------------------------------------|-------------------------------------------------------------------------------------------------------------------------------------------------------------------|
| CCDC Number                                 | 2372722                                                                                                                                                           |
| Empirical Formula                           | C <sub>45.44</sub> H <sub>46.56</sub> CoF <sub>6</sub> N <sub>2</sub> O <sub>0.79</sub> P <sub>4</sub>                                                            |
| Molecular Formula                           | C <sub>41</sub> H <sub>39</sub> CoN <sub>2</sub> P <sub>3</sub> , 0.784(C <sub>4</sub> H <sub>8</sub> O), 0.216(C <sub>6</sub> H <sub>6</sub> ), F <sub>6</sub> P |
| Formula Weight (g/mol)                      | 930.00                                                                                                                                                            |
| Temperature (K)                             | 100.0                                                                                                                                                             |
| Wavelength (Å)                              | 0.71073                                                                                                                                                           |
| Crystal System                              | Triclinic                                                                                                                                                         |
| Space Group                                 | P-1                                                                                                                                                               |
| a (Å)                                       | 11.4936(5)                                                                                                                                                        |
| b (Å)                                       | 12.2636(5)                                                                                                                                                        |
| c (Å)                                       | 15.7199(7)                                                                                                                                                        |
| α (°)                                       | 87.1280(10)                                                                                                                                                       |
| β (°)                                       | 75.067(2)                                                                                                                                                         |
| γ (°)                                       | 85.5970(10)                                                                                                                                                       |
| Volume (Å <sup>3</sup> )                    | 2133.56(16)                                                                                                                                                       |
| Z                                           | 2                                                                                                                                                                 |
| Density (calculated) (g/cm <sup>3</sup> )   | 1.448                                                                                                                                                             |
| Absorption Coefficient (mm <sup>-1</sup> )  | 0.616                                                                                                                                                             |
| F(000)                                      | 961                                                                                                                                                               |
| Crystal Size (mm <sup>3</sup> )             | 0.132 x 0.086 x 0.084                                                                                                                                             |
| Crystal color, habit                        | red block                                                                                                                                                         |
| Final R indices [ <i>I</i> >2σ( <i>I</i> )] | R <sub>1</sub> = 0.0282, wR <sub>2</sub> = 0.0707                                                                                                                 |
| R indices (all data)                        | R <sub>1</sub> = 0.0313, wR <sub>2</sub> = 0.0734                                                                                                                 |



## Magnetic Susceptibility Data

Figure S34. Magnetic susceptibility of **1**, **2**, **5**, and **6** as a function of temperature.

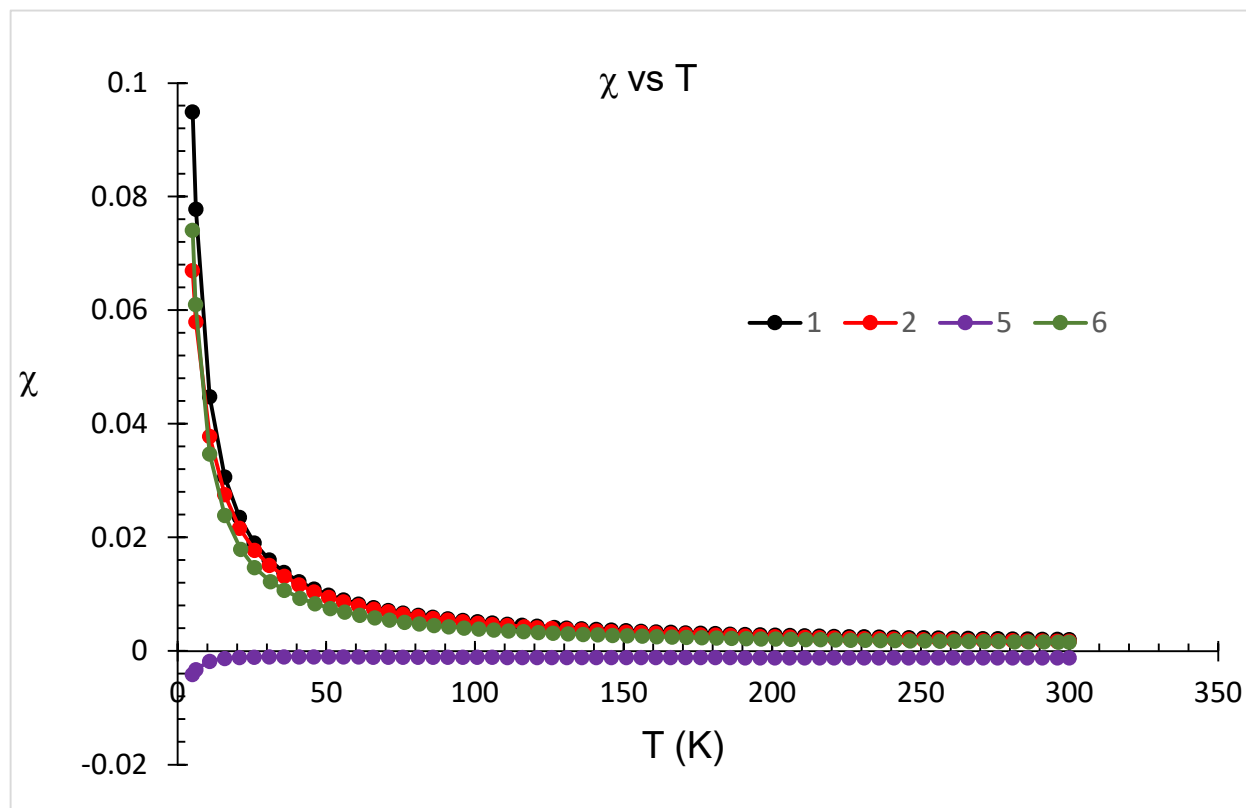

**Moment vs Field Strength Graphs.** To rule out the presence of other paramagnetic impurities present in the sample, the magnetic moment was measured as a function of field strength.

**Figure S35.** Moment vs field strength plots for 1.

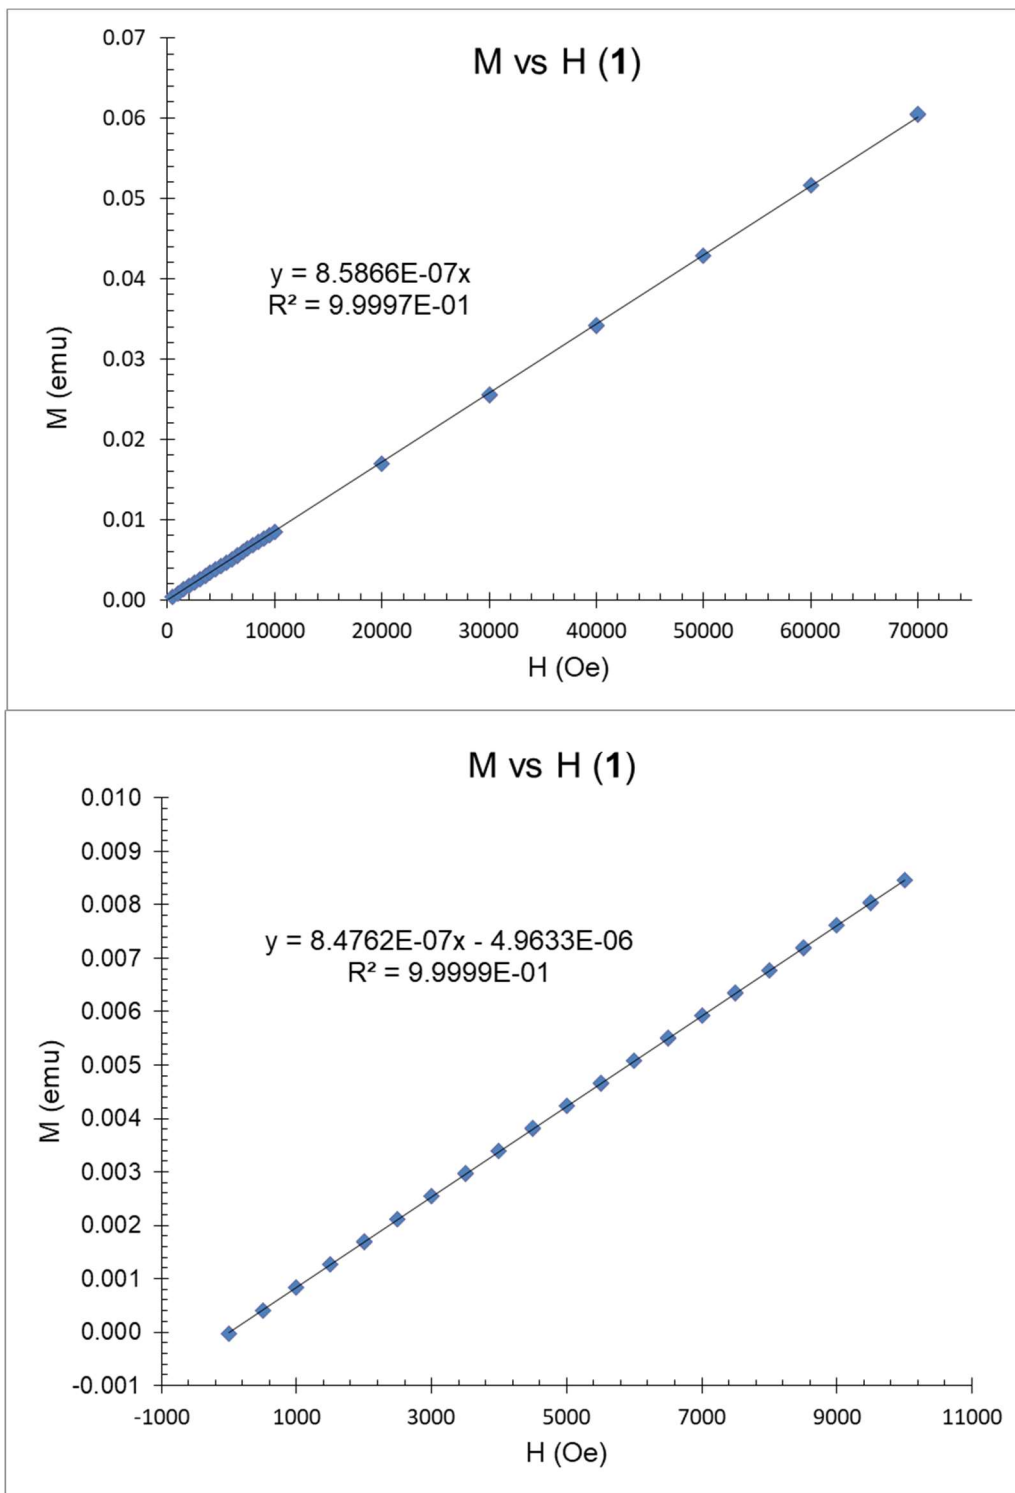

Figure S36. Moment vs field strength plots for 2.

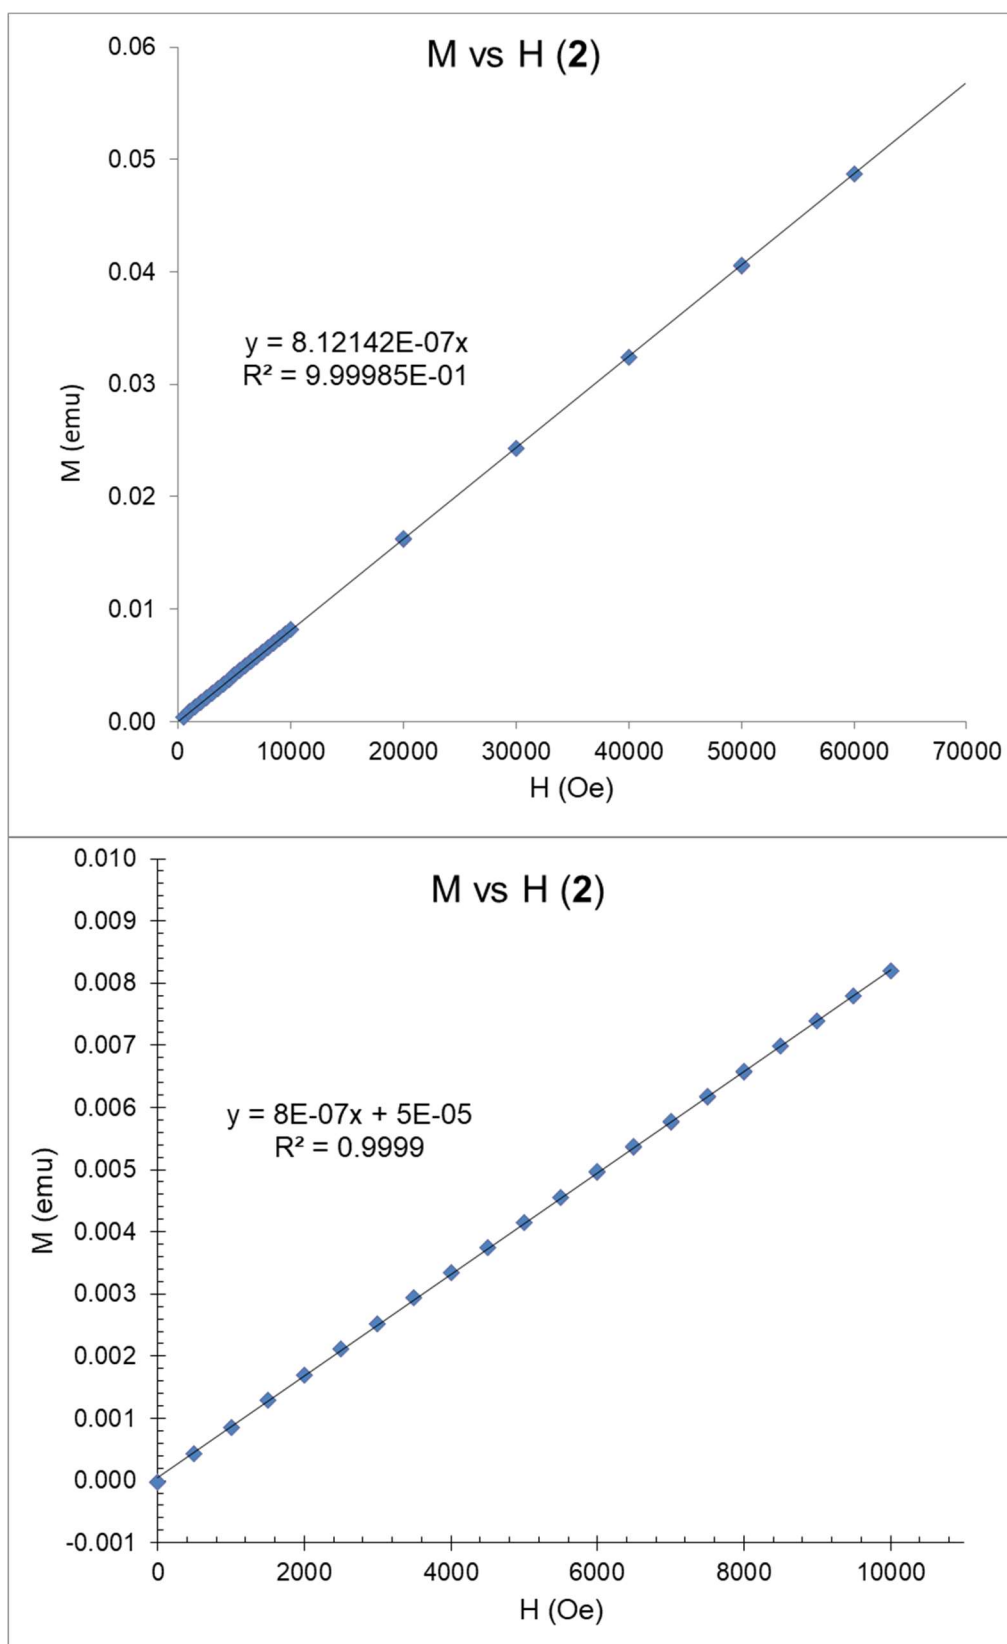

Figure S37. Moment vs field strength plots for 5.

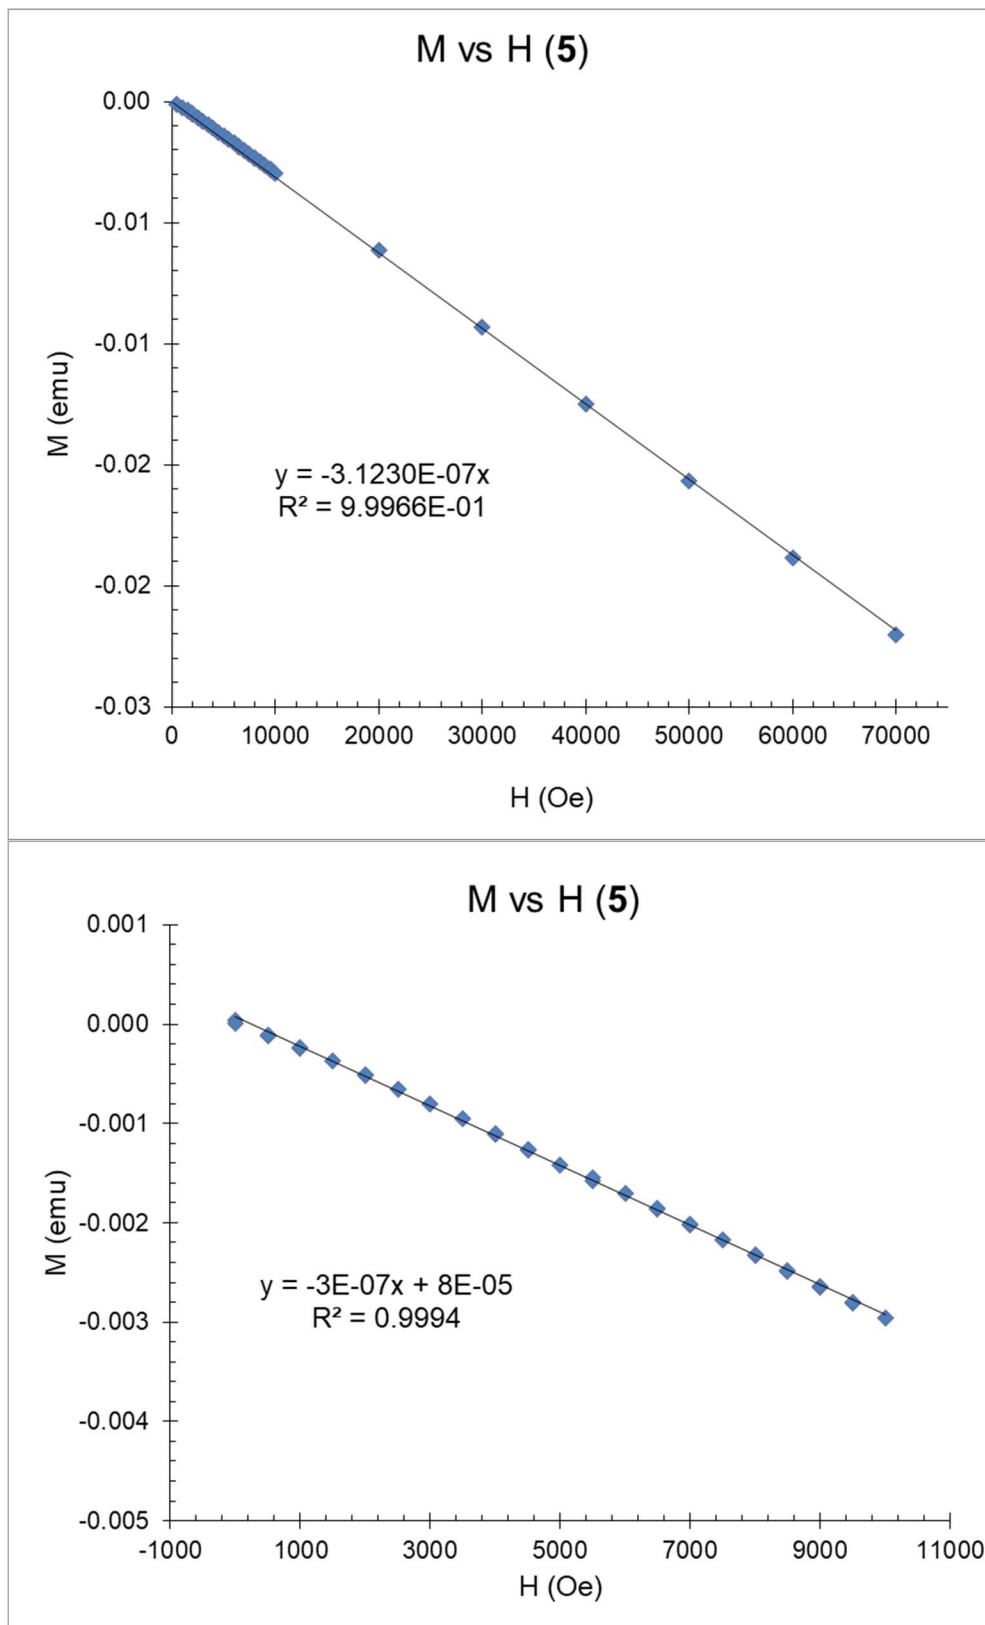

Figure S38. Moment vs field strength plots for 6.

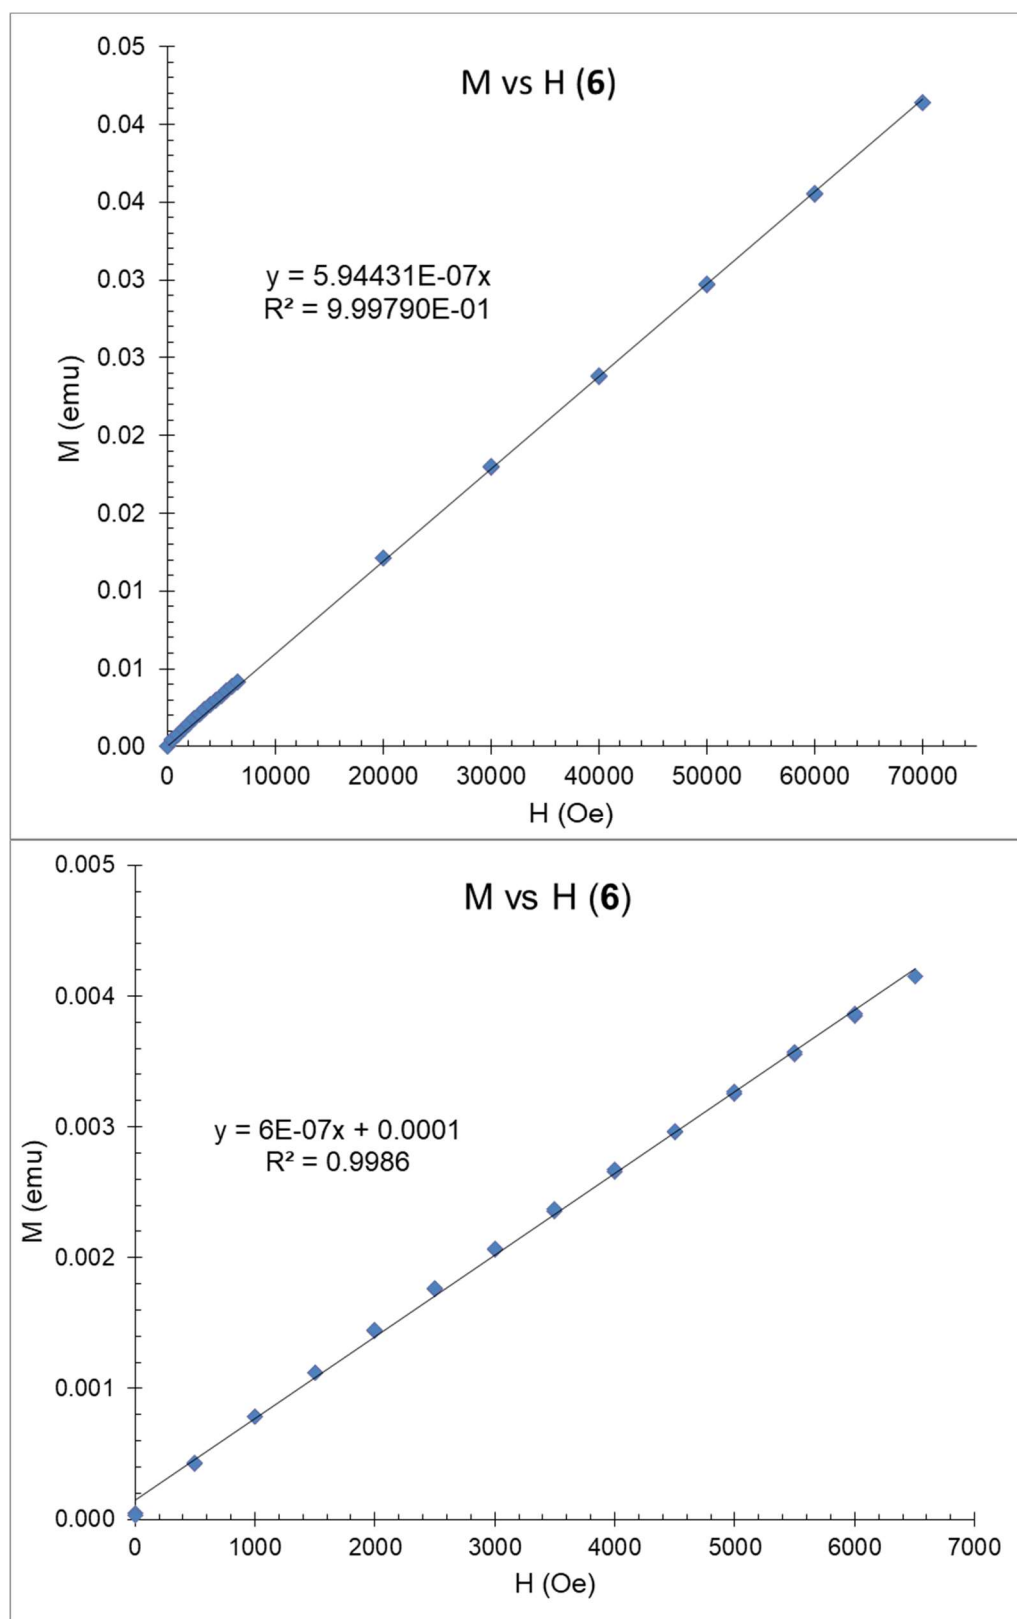

## Quantum Chemical Calculations:

**Computational Details.** The ORCA 5.0.3 software package<sup>5-7</sup> was used for all computations. Geometry optimizations, single-point numerical frequency calculations, and broken-symmetry calculations were performed at the  $\omega$ B97X-D3<sup>8</sup>/def2-SVP<sup>9,10</sup> level of theory in the gas phase. Crystallographic coordinates were used as the starting geometries for **1** and **2**, following removal of the solvate molecule in the crystal lattice. The starting geometries for **5**<sup>0</sup>, **5**<sup>THF</sup>, and **5**<sup>2THF</sup> in all three spin states were obtained by removing the PF<sub>6</sub> counterion and THF solvate molecule leaving a THF molecule bound to the metal center (**5**<sup>THF</sup>), then removing the remaining THF molecule (**5**<sup>0</sup>) or adding an additional THF molecule to the cobalt center (**5**<sup>2THF</sup>). The starting geometry for **6** was obtained from the crystallographic coordinates following removal of the two PF<sub>6</sub> anions and THF solvate. The starting geometry for **7** was obtained from the crystallographic coordinates following removal of the PF<sub>6</sub> anion, THF solvate, and benzene solvate. Numerical frequency calculations were performed on all optimized geometries to ensure the absence of significant imaginary frequencies (>100 cm<sup>-1</sup>). When changing the spin-state of a molecule, the same starting geometry was used for each spin-state calculation.

**Figure S39.** Relative energies of **5**<sup>THF</sup> and **7** in three different spin states.

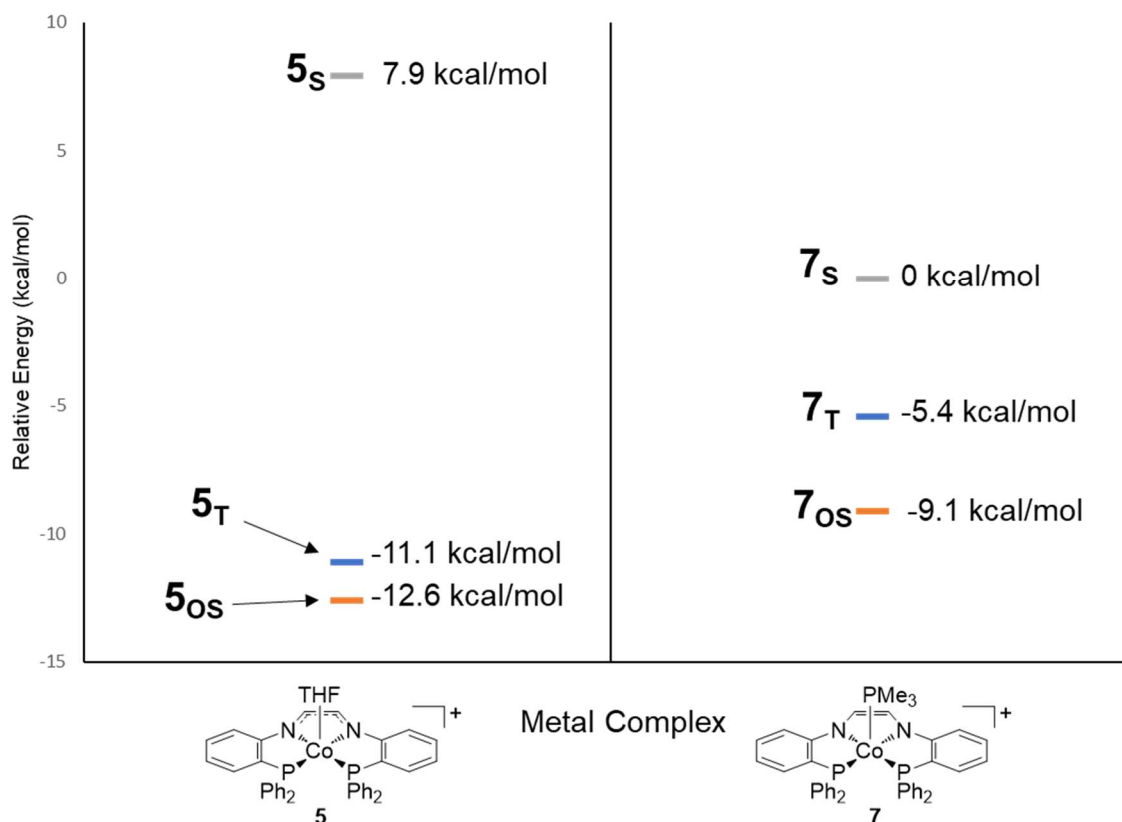

## Spin Density Plots

**Figure S40.** Spin density plot of **1** (isovalue = 0.008).

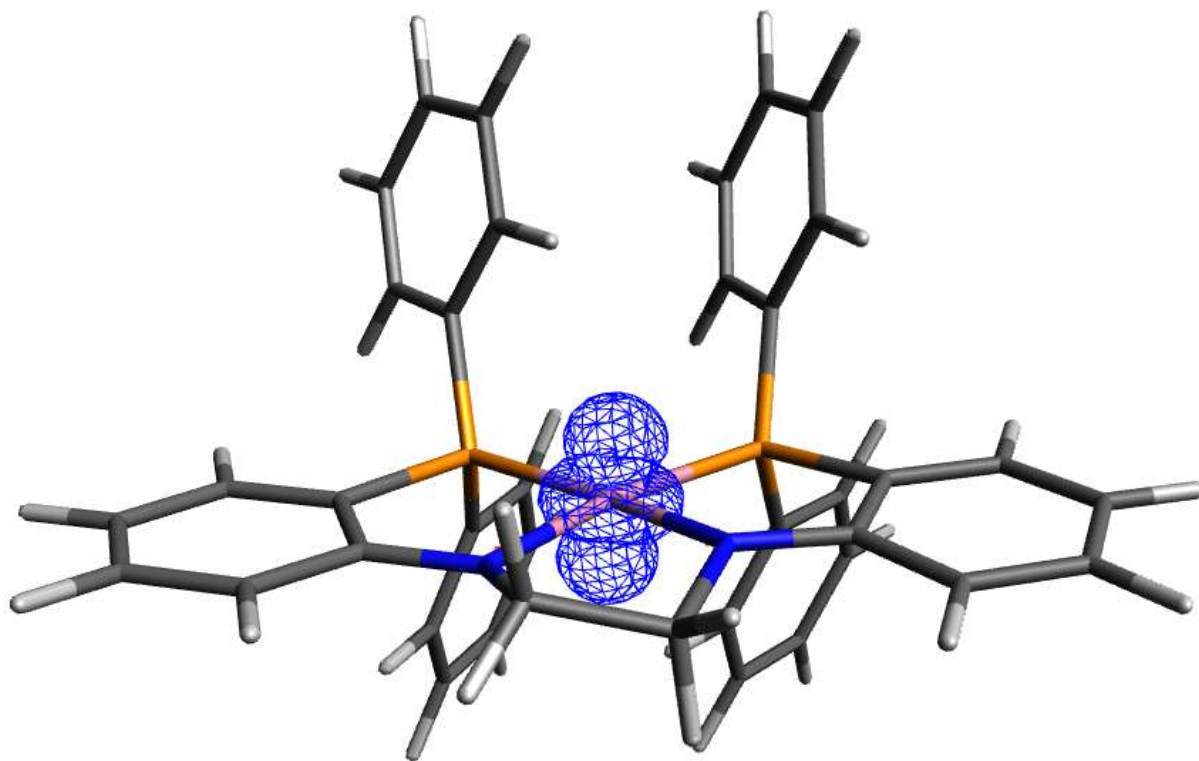

**Figure S41.** Spin density plot of **2** (isovalue = 0.04).

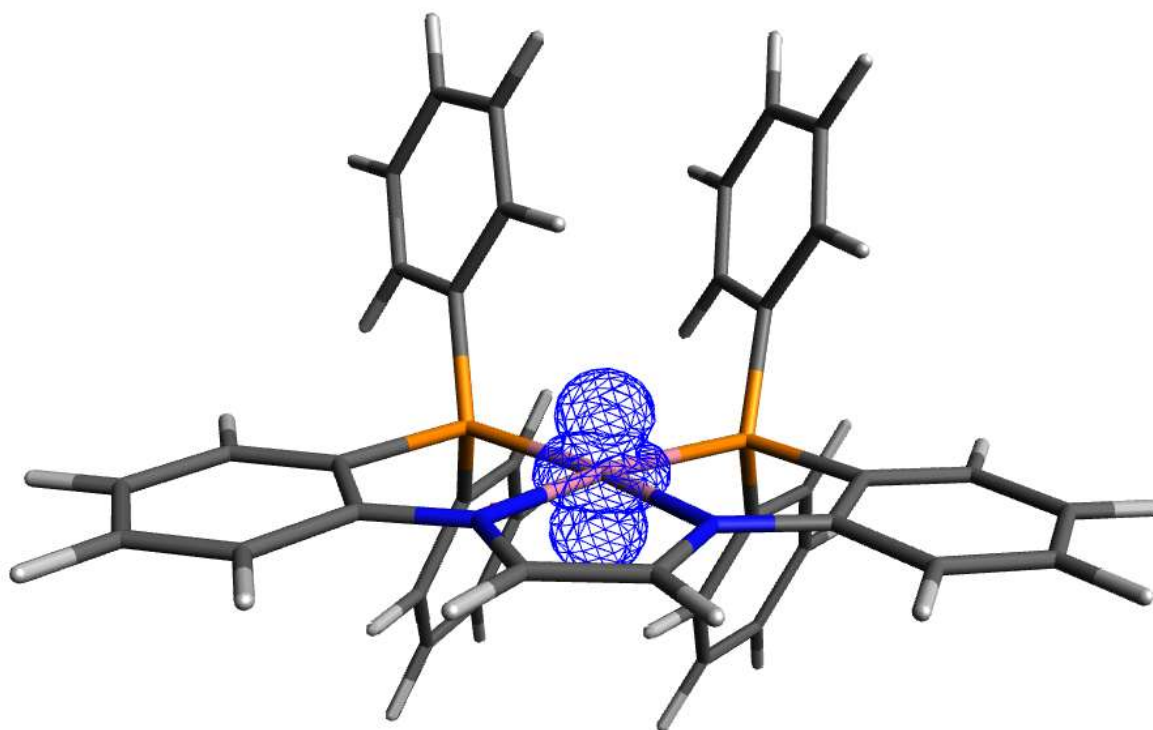

**Figure S42.** Spin density plot of  $5^0_{os}$  (isovalue = 0.004).

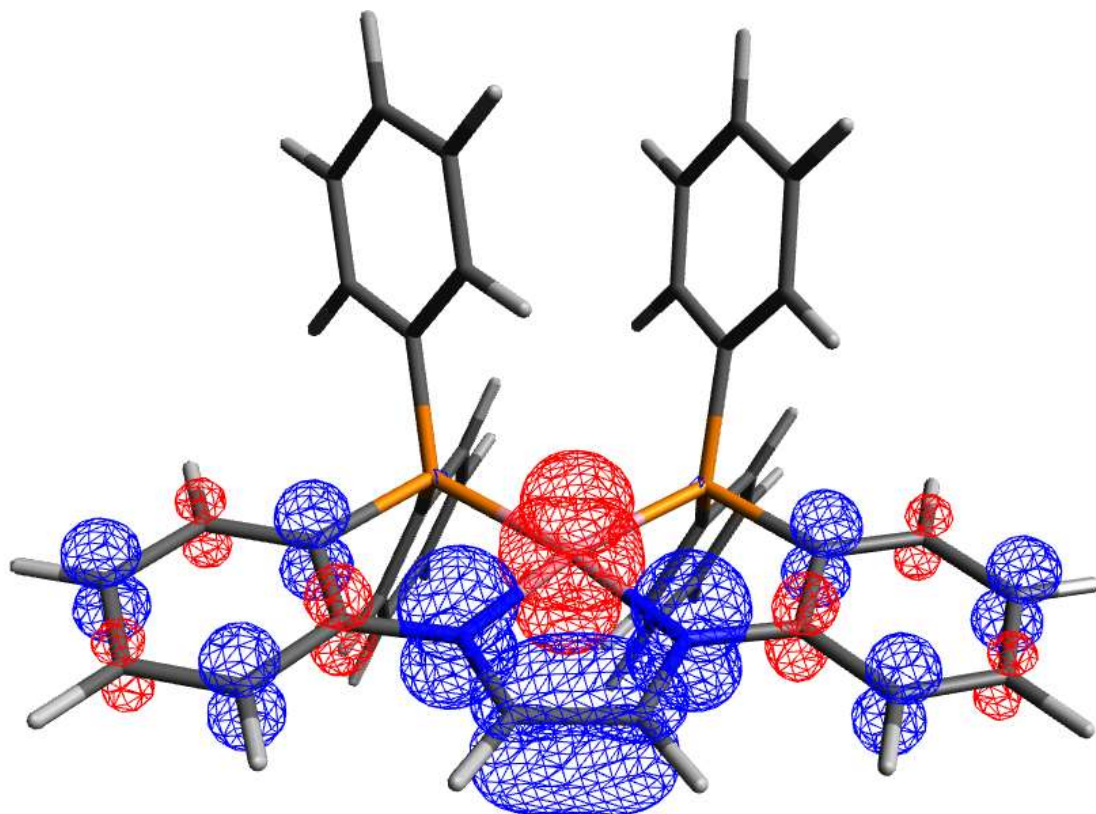

**Figure S43.** Spin density plot of  $5^{THF}_{os}$  (isovalue = 0.004).

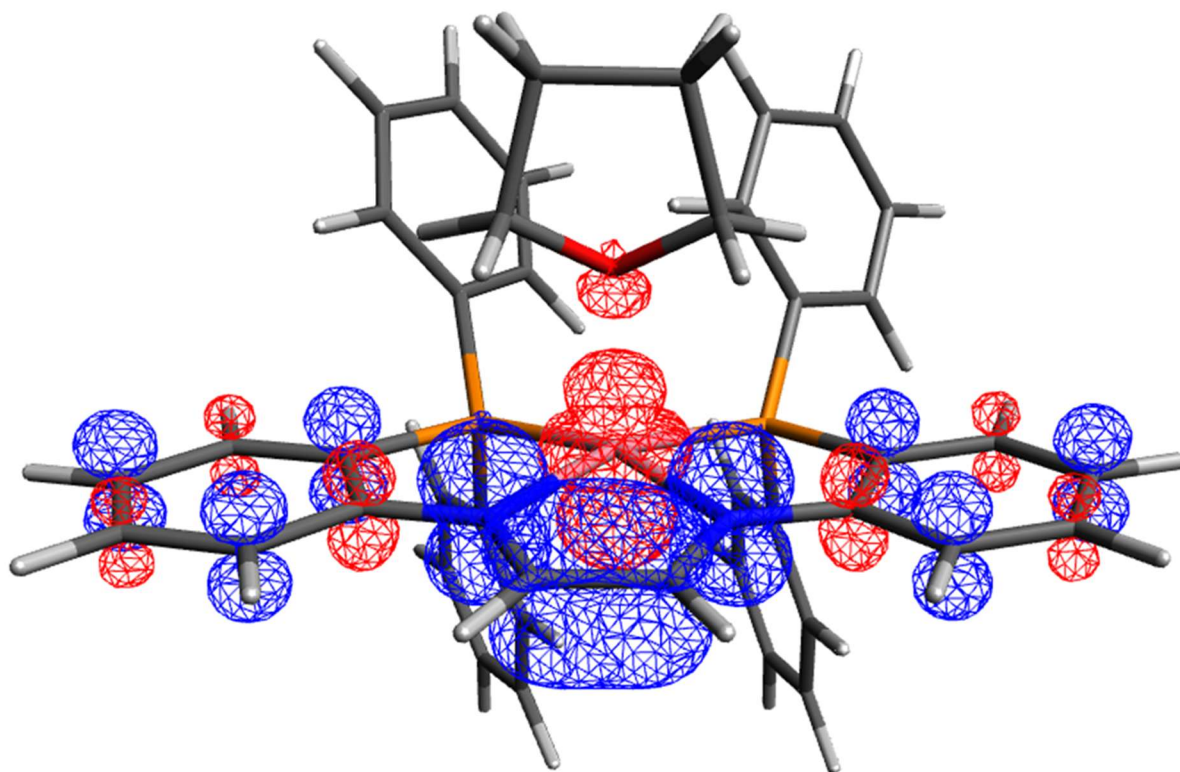



**Figure S44.** Spin density plot of  $5^{2\text{THF}}_{\text{os}}$  (isovalue = 0.004).

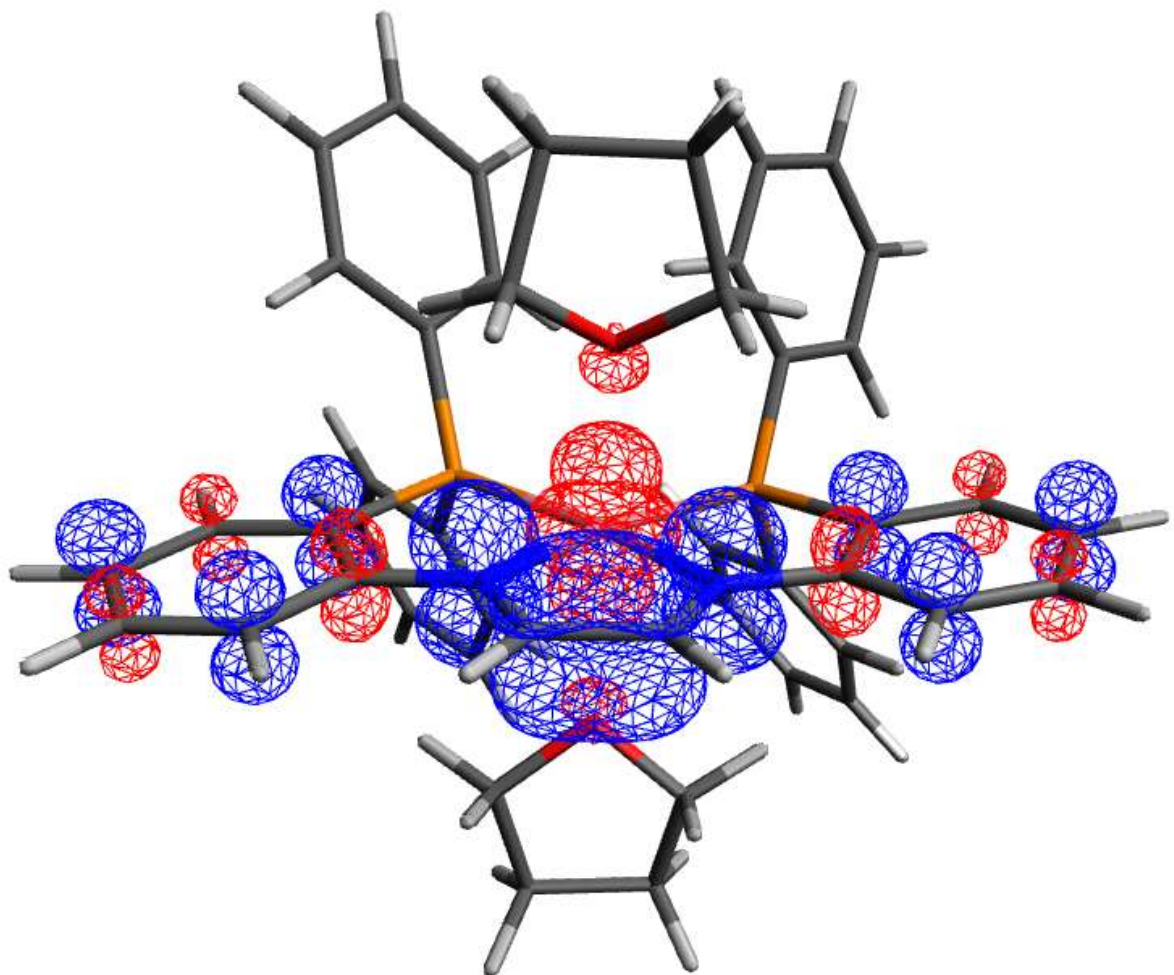

**Figure S45.** Spin density plot of **6** (isovalue = 0.008).

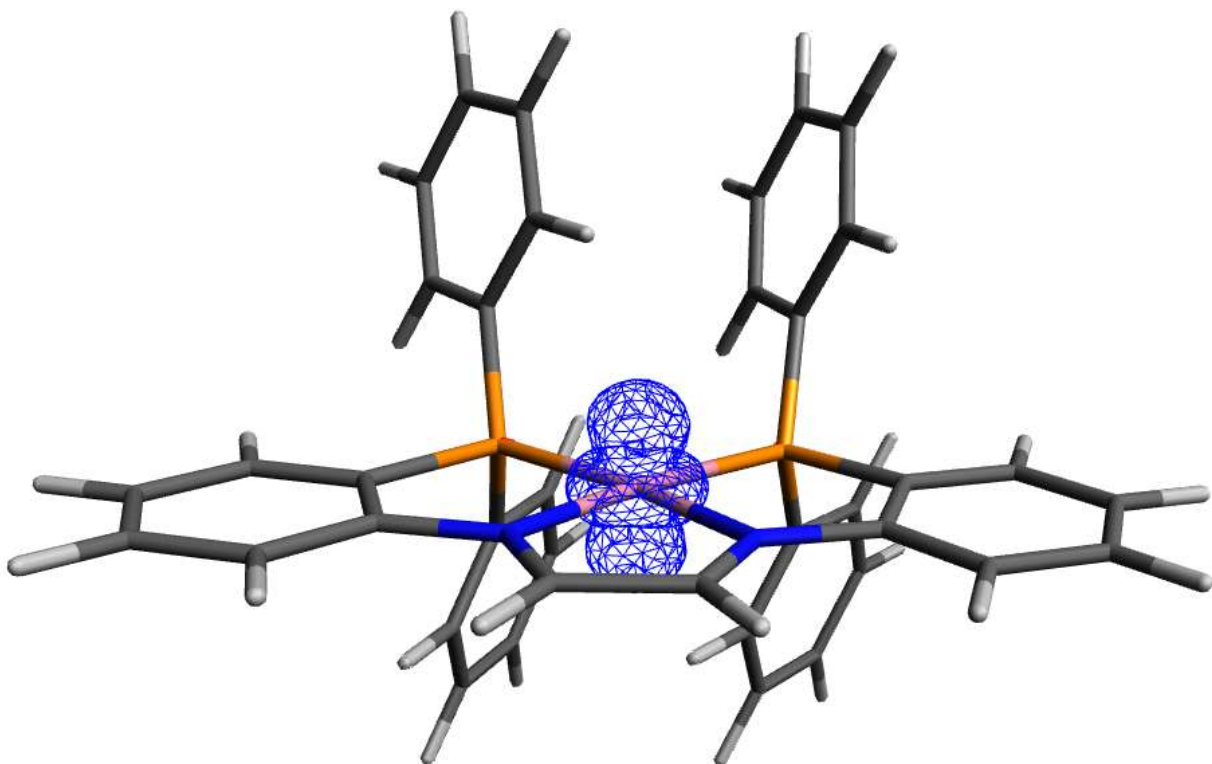

**Comparison to X-ray structures.** The computed bond distances were compared to the bond distances obtained from the crystal structures for complexes **1**, **2**, **5**, and **6**. The first column describes the atom numbers from the computational data with the corresponding atoms in the crystal structure listed in parentheses. The bonds colored in red represent the internal structure of the molecule (including the backbone), blue represents the heteroatom-carbon connections between the internal structure and the aryl linkers, and green/black represent the C-C bonds in the aryl linkers.

**Table S5.** Computed bond distances compared to solid-state structure of **1**.

| Bond                      | Computed (Å) | Crystal Structure (Å) | Deviation (Å)  |
|---------------------------|--------------|-----------------------|----------------|
| Co1-N4 (Co1-N2)           | 1.890        | 1.8754(14)            | 0.0146         |
| Co1-N5 (Co1-N1)           | 1.888        | 1.8669(14)            | 0.0211         |
| Co1-P3 (Co1-P2)           | 2.225        | 2.1932(5)             | 0.0318         |
| Co1-P2 (Co1-P1)           | 2.222        | 2.1930(5)             | 0.029          |
| N4-C8 (N1-C7)             | 1.448        | 1.452(2)              | 0.004          |
| N5-N26 (N2-C8)            | 1.448        | 1.450(2)              | 0.002          |
| C8-C26 (C7-C8)            | 1.524        | 1.522(2)              | 0.002          |
| N4-C23 (N1-C2)            | 1.358        | 1.375(2)              | 0.017          |
| N5-C22 (N2-C9)            | 1.357        | 1.373(2)              | 0.016          |
| P3-C24 (P1-C1)            | 1.803        | 1.8146(16)            | 0.0116         |
| P2-C33 (P2-C10)           | 1.803        | 1.8140(16)            | 0.011          |
| C24-C54 (C1-C6)           | 1.396        | 1.390(2)              | 0.006          |
| C54-C60 (C6-C5)           | 1.390        | 1.386(2)              | 0.004          |
| C60-C44 (C5-C4)           | 1.402        | 1.394(3)              | 0.008          |
| C44-C48 (C4-C3)           | 1.387        | 1.384(2)              | 0.003          |
| C48-C23 (C3-C2)           | 1.422        | 1.414(2)              | 0.008          |
| C23-C24 (C2-C1)           | 1.427        | 1.417(2)              | 0.01           |
| C33-C52 (C10-C11)         | 1.396        | 1.389(2)              | 0.007          |
| C52-C70 (C11-C12)         | 1.390        | 1.393(2)              | 0.003          |
| C70-C66 (C12-C13)         | 1.402        | 1.390(3)              | 0.012          |
| C66-C16 (C13-C14)         | 1.387        | 1.391(2)              | 0.004          |
| C16-C22 (C14-C9)          | 1.422        | 1.413(2)              | 0.009          |
| C22-C33 (C9-C10)          | 1.427        | 1.419(2)              | 0.008          |
| <b>Average Deviation:</b> |              |                       | <b>0.011 Å</b> |

**Table S6.** Computed bond distances compared to solid-state structure of **2**.

| Bond                      | Computed (Å) | Crystal Structure (Å) | Deviation (Å)  |
|---------------------------|--------------|-----------------------|----------------|
| Co-N3 (Co1-N1)            | 1.892        | 1.878(2)              | 0.014          |
| Co-N39 (Co1-N1)           | 1.893        | 1.878(2)              | 0.015          |
| Co-P2 (Co1-P1)            | 2.218        | 2.1866(7)             | 0.0314         |
| Co-P38 (Co1-P1)           | 2.220        | 2.1866(7)             | 0.0334         |
| N3-C14 (N1-C7)            | 1.395        | 1.403(3)              | 0.008          |
| N39-C58 (N1-C7)           | 1.395        | 1.403(3)              | 0.008          |
| C14-C58 (C7-C7)           | 1.349        | 1.396(5)              | 0.047          |
| N3-C23 (N1-C2)            | 1.364        | 1.380(3)              | 0.016          |
| N39-C49 (N1-C2)           | 1.363        | 1.380(3)              | 0.017          |
| P2-C13 (P1-C1)            | 1.806        | 1.810(3)              | 0.004          |
| P38-C49 (P1-C1)           | 1.807        | 1.810(3)              | 0.003          |
| C13-C4 (C1-C6)            | 1.396        | 1.389(3)              | 0.007          |
| C4-C18 (C6-C5)            | 1.390        | 1.391(4)              | 0.001          |
| C18-C9 (C5-C4)            | 1.402        | 1.383(4)              | 0.019          |
| C9-C32 (C4-C3)            | 1.386        | 1.388(4)              | 0.002          |
| C32-C23 (C3-C2)           | 1.419        | 1.410(3)              | 0.009          |
| C23-C13 (C2-C1)           | 1.425        | 1.417(4)              | 0.008          |
| C49-C40 (C1-C6)           | 1.396        | 1.389(3)              | 0.007          |
| C40-C54 (C6-C5)           | 1.390        | 1.391(4)              | 0.001          |
| C54-C45 (C5-C4)           | 1.402        | 1.383(4)              | 0.019          |
| C45-C68 (C4-C3)           | 1.386        | 1.388(4)              | 0.002          |
| C68-C59 (C3-C2)           | 1.419        | 1.410(3)              | 0.009          |
| C59-C49 (C2-C1)           | 1.425        | 1.417(4)              | 0.008          |
| <b>Average Deviation:</b> |              |                       | <b>0.013 Å</b> |

**Table S7.** Computed bond distances of  $5^{THF}_S$ ,  $5^{THF}_{OS}$  and  $5^{THF}_T$  compared to solid-state structure of **5**.

| Bond<br>Calculated (Crystal) | Crystal<br>Structure<br>(Å) | $5^{THF}_S$     |                  | $5^{THF}_{OS}$  |                  | $5^{THF}_T$     |                  |
|------------------------------|-----------------------------|-----------------|------------------|-----------------|------------------|-----------------|------------------|
|                              |                             | Computed<br>(Å) | Deviation<br>(Å) | Computed<br>(Å) | Deviation<br>(Å) | Computed<br>(Å) | Deviation<br>(Å) |
| Co-N5 (Co1-N2)               | 1.906(3)                    | 1.878           | 0.028            | 1.932           | 0.026            | 1.934           | 0.028            |
| Co-N48 (Co1-N1)              | 1.910(3)                    | 1.877           | 0.033            | 1.933           | 0.023            | 1.935           | 0.025            |
| Co-P3 (Co1-P2)               | 2.1835(11)                  | 2.224           | 0.0405           | 2.228           | 0.0445           | 2.232           | 0.0485           |
| Co-P2 (Co1-P1)               | 2.1997(10)                  | 2.223           | 0.0233           | 2.231           | 0.0313           | 2.234           | 0.0343           |
| N5-C44 (N2-C8)               | 1.337(5)                    | 1.342           | 0.005            | 1.337           | 0                | 1.337           | 0                |
| N48-C77 (N1-C7)              | 1.336(5)                    | 1.342           | 0.006            | 1.336           | 0                | 1.337           | 0.001            |
| C44-C77 (C8-C7)              | 1.391(6)                    | 1.386           | 0.005            | 1.399           | 0.008            | 1.399           | 0.008            |
| N5-C12 (N2-C9)               | 1.408(5)                    | 1.411           | 0.003            | 1.398           | 0.01             | 1.394           | 0.014            |
| N48-C16 (N1-C2)              | 1.404(5)                    | 1.410           | 0.006            | 1.398           | 0.006            | 1.394           | 0.01             |
| P3-C13 (P2-C10)              | 1.822(4)                    | 1.820           | 0.002            | 1.823           | 0.001            | 1.821           | 0.001            |
| P2-C82 (P1-C1)               | 1.819(4)                    | 1.825           | 0.006            | 1.828           | 0.009            | 1.827           | 0.008            |
| C13-C71 (C10-C11)            | 1.401(6)                    | 1.395           | 0.006            | 1.396           | 0.005            | 1.396           | 0.005            |
| C71-C38 (C11-C12)            | 1.388(6)                    | 1.391           | 0.003            | 1.391           | 0.003            | 1.391           | 0.003            |
| C38-C46 (C12-C13)            | 1.384(6)                    | 1.396           | 0.012            | 1.397           | 0.013            | 1.397           | 0.013            |
| C46-C51 (C13-C14)            | 1.389(6)                    | 1.391           | 0.002            | 1.390           | 0.001            | 1.389           | 0                |
| C51-C12 (C14-C9)             | 1.405(6)                    | 1.401           | 0.004            | 1.404           | 0.001            | 1.405           | 0                |
| C12-C13 (C9-C10)             | 1.396(5)                    | 1.407           | 0.011            | 1.412           | 0.016            | 1.412           | 0.016            |
| C82-C10 (C1-C6)              | 1.396(6)                    | 1.395           | 0.001            | 1.395           | 0.001            | 1.395           | 0.001            |
| C10-C6 (C6-C5)               | 1.390(6)                    | 1.391           | 0.001            | 1.392           | 0.002            | 1.391           | 0.001            |
| C6-C42 (C5-C4)               | 1.392(6)                    | 1.396           | 0.004            | 1.397           | 0.005            | 1.397           | 0.005            |
| C42-C20 (C4-C3)              | 1.379(6)                    | 1.391           | 0.012            | 1.390           | 0.011            | 1.389           | 0.01             |
| C20-C16 (C3-C2)              | 1.405(5)                    | 1.401           | 0.004            | 1.404           | 0.001            | 1.405           | 0                |
| C16-C82 (C2-C1)              | 1.403(6)                    | 1.407           | 0.004            | 1.412           | 0.009            | 1.413           | 0.01             |
| <b>Average Deviation:</b>    |                             |                 | <b>0.0096 Å</b>  |                 | <b>0.0099 Å</b>  |                 | <b>0.011 Å</b>   |

**Table S8** Computed bond distances of **6** ( $S = 1/2$ ) and **6** ( $S = 3/2$ ) compared to solid-state structure of **6**.

| Bond<br>Calculation (Crystal) | Crystal Structure<br>(Å) | <b>6</b> ( $S = 1/2$ ) |                | <b>6</b> ( $S = 3/2$ ) |                |
|-------------------------------|--------------------------|------------------------|----------------|------------------------|----------------|
|                               |                          | Computed (Å)           | Deviation (Å)  | Computed (Å)           | Deviation (Å)  |
| Co-N3 (Co1-N1)                | 1.935(3)                 | 1.953                  | 0.018          | 2.100                  | 0.165          |
| Co-N31 (Co1-N2)               | 1.924(3)                 | 1.953                  | 0.029          | 2.119                  | 0.195          |
| Co-P2 (Co1-P1)                | 2.2053(10)               | 2.221                  | 0.0157         | 2.343                  | 0.1377         |
| Co-P30 (Co1-P2)               | 2.2101(10)               | 2.218                  | 0.0079         | 2.334                  | 0.1239         |
| N3-C10 (N1-C7)                | 1.289(5)                 | 1.289                  | 0              | 1.282                  | 0.007          |
| N31-C42 (N2-C8)               | 1.286(5)                 | 1.289                  | 0.003          | 1.281                  | 0.005          |
| C10-C42 (C7-C8)               | 1.450(5)                 | 1.468                  | 0.018          | 1.479                  | 0.029          |
| N3-C17 (N1-C2)                | 1.420(5)                 | 1.417                  | 0.003          | 1.418                  | 0.002          |
| N31-C51 (N2-C9)               | 1.426(5)                 | 1.417                  | 0.009          | 1.418                  | 0.008          |
| P2-C9 (P1-C1)                 | 1.824(4)                 | 1.831                  | 0.007          | 1.832                  | 0.008          |
| P30-C41 (P2-C10)              | 1.820(4)                 | 1.830                  | 0.01           | 1.826                  | 0.006          |
| C9-C67 (C1-C6)                | 1.398(5)                 | 1.396                  | 0.002          | 1.396                  | 0.002          |
| C67-C68 (C6-C5)               | 1.381(5)                 | 1.393                  | 0.012          | 1.393                  | 0.012          |
| C67-C69 (C5-C4)               | 1.390(6)                 | 1.398                  | 0.008          | 1.395                  | 0.005          |
| C69-C66 (C4-C3)               | 1.385(5)                 | 1.389                  | 0.004          | 1.390                  | 0.005          |
| C66-C17 (C3-C2)               | 1.394(5)                 | 1.400                  | 0.006          | 1.400                  | 0.006          |
| C17-C9 (C2-C1)                | 1.395(5)                 | 1.409                  | 0.014          | 1.414                  | 0.019          |
| C41-C32 (C10-C11)             | 1.400(5)                 | 1.396                  | 0.004          | 1.395                  | 0.005          |
| C32-C46 (C11-C12)             | 1.382(5)                 | 1.393                  | 0.011          | 1.394                  | 0.012          |
| C46-C37 (C12-C13)             | 1.376(6)                 | 1.398                  | 0.022          | 1.395                  | 0.019          |
| C37-C60 (C13-C14)             | 1.381(6)                 | 1.389                  | 0.008          | 1.391                  | 0.01           |
| C60-C51 (C14-C9)              | 1.393(5)                 | 1.400                  | 0.007          | 1.399                  | 0.006          |
| C51-C41 (C9-C10)              | 1.393(5)                 | 1.409                  | 0.016          | 1.413                  | 0.02           |
| <b>Average Deviation:</b>     |                          |                        | <b>0.010 Å</b> |                        | <b>0.035 Å</b> |

**Table S9.** Computed bond distances of  $7_s$ ,  $7_T$ , and  $7_{os}$  compared to solid state structure.

| Bond<br>Calculated (Crystal) | Crystal<br>Structure<br>(Å) | $7_s$           |                  | $7_T$           |                  | $7_{os}$        |                  |
|------------------------------|-----------------------------|-----------------|------------------|-----------------|------------------|-----------------|------------------|
|                              |                             | Computed<br>(Å) | Deviation<br>(Å) | Computed<br>(Å) | Deviation<br>(Å) | Computed<br>(Å) | Deviation<br>(Å) |
| Co-N5 (Co1-N1)               | 1.8825(13)                  | 1.862           | 0.0205           | 1.950           | 0.0675           | 1.928           | 0.0455           |
| Co-N6 (Co1-N2)               | 1.8903(13)                  | 1.879           | 0.0113           | 1.944           | 0.0537           | 1.924           | 0.0337           |
| Co-P3 (Co1-P2)               | 2.1938(4)                   | 2.232           | 0.0382           | 2.239           | 0.0452           | 2.227           | 0.0332           |
| Co-P2 (Co1-P3)               | 2.1856(4)                   | 2.209           | 0.0234           | 2.243           | 0.0574           | 2.228           | 0.0424           |
| Co-P4 (Co1-P1)               | 2.2344(4)                   | 2.231           | 0.0034           | 2.447           | 0.2126           | 2.350           | 0.1156           |
| N5-C29 (N1-C1)               | 1.352(2)                    | 1.355           | 0.003            | 1.339           | 0.013            | 1.341           | 0.011            |
| N6-C23 (N2-C2)               | 1.348(2)                    | 1.349           | 0.001            | 1.336           | 0.012            | 1.338           | 0.01             |
| C23-C29 (C1-C2)              | 1.378(2)                    | 1.378           | 0                | 1.398           | 0.02             | 1.394           | 0.016            |
| N5-C13 (N1-C3)               | 1.414(2)                    | 1.414           | 0                | 1.392           | 0.022            | 1.400           | 0.014            |
| N6-C7 (N2-C9)                | 1.413(2)                    | 1.409           | 0.004            | 1.394           | 0.019            | 1.401           | 0.012            |
| P3-C14 (P2-C4)               | 1.8156(16)                  | 1.818           | 0.0024           | 1.820           | 0.0044           | 1.821           | 0.0054           |
| P2-C17 (P3-C10)              | 1.8161(15)                  | 1.820           | 0.0039           | 2.243           | 0.4269           | 1.825           | 0.0089           |
| C14-C27 (C4-C5)              | 1.398(2)                    | 1.396           | 0.002            | 1.399           | 0.001            | 1.397           | 0.001            |
| C27-C15 (C5-C6)              | 1.387(2)                    | 1.391           | 0.004            | 1.390           | 0.003            | 1.391           | 0.004            |
| C15-C38 (C6-C7)              | 1.390(3)                    | 1.396           | 0.006            | 1.399           | 0.009            | 1.397           | 0.007            |
| C38-C31 (C7-C8)              | 1.388(3)                    | 1.392           | 0.004            | 1.388           | 0                | 1.390           | 0.002            |
| C31-C13 (C8-C3)              | 1.399(2)                    | 1.402           | 0.003            | 1.407           | 0.008            | 1.404           | 0.005            |
| C13-C14 (C3-C4)              | 1.400(2)                    | 1.406           | 0.006            | 1.412           | 0.012            | 1.410           | 0.01             |
| C17-C11 (C10-C11)            | 1.391(2)                    | 1.394           | 0.003            | 1.395           | 0.004            | 1.394           | 0.003            |
| C11-C8 (C11-C12)             | 1.391(2)                    | 1.393           | 0.002            | 1.392           | 0.001            | 1.393           | 0.002            |
| C8-C45 (C12-C13)             | 1.388(2)                    | 1.396           | 0.008            | 1.397           | 0.009            | 1.396           | 0.008            |
| C45-C25 (C13-C14)            | 1.388(2)                    | 1.392           | 0.004            | 1.390           | 0.002            | 1.392           | 0.004            |
| C25-C7 (C14-C9)              | 1.398(2)                    | 1.400           | 0.002            | 1.404           | 0.006            | 1.402           | 0.004            |
| C7-C17 (C9-C10)              | 1.404(2)                    | 1.408           | 0.004            | 1.412           | 0.008            | 1.410           | 0.006            |
| <b>Average Deviation:</b>    |                             |                 | <b>0.0066 Å</b>  |                 | <b>0.042 Å</b>   |                 | <b>0.017 Å</b>   |

**XYZ coordinates of optimized structures:****Table S10.** XYZ coordinates of DFT optimized geometry of 1.

| Symbol | X           | Y           | Z           |
|--------|-------------|-------------|-------------|
| Co     | 7.880339795 | 6.177502106 | 11.17171233 |
| P      | 6.308577218 | 7.729089813 | 10.9305637  |
| P      | 6.726404922 | 4.309802119 | 11.53255894 |
| N      | 9.404023935 | 5.059718859 | 11.2179859  |
| N      | 9.101997205 | 7.603720553 | 10.97400097 |
| C      | 5.699562192 | 6.748660863 | 8.418782415 |
| H      | 6.61741567  | 6.16875958  | 8.552221488 |
| C      | 10.64969348 | 5.789069271 | 11.32952124 |
| H      | 11.48565711 | 5.276372009 | 10.81862243 |
| H      | 10.94716457 | 5.890736276 | 12.39472952 |
| C      | 6.217381144 | 3.051719981 | 9.092627425 |
| H      | 7.269219781 | 2.754997613 | 9.138393474 |
| C      | 5.17115964  | 8.027739466 | 12.32976413 |
| C      | 4.300376002 | 4.119757036 | 10.09794071 |
| H      | 3.841858891 | 4.663634898 | 10.92767156 |
| C      | 9.610246147 | 9.952604179 | 10.41374438 |
| H      | 10.68359456 | 9.769833054 | 10.3477612  |
| C      | 3.941031644 | 7.365275734 | 12.42454809 |
| H      | 3.591714885 | 6.743322686 | 11.59636818 |

|   |             |              |             |
|---|-------------|--------------|-------------|
| C | 5.603977982 | 8.816075698  | 13.40283518 |
| H | 6.563237358 | 9.337542399  | 13.33703082 |
| C | 8.724252134 | 8.880494189  | 10.71069577 |
| C | 9.352223012 | 3.745279432  | 11.55429832 |
| C | 8.07477315  | 3.123603288  | 11.68993365 |
| C | 5.647335318 | 3.742563428  | 10.16839791 |
| C | 10.45849798 | 7.170534453  | 10.71395235 |
| H | 11.2100891  | 7.863193413  | 11.1352237  |
| H | 10.65100721 | 7.124365304  | 9.621278263 |
| C | 5.709921912 | 4.195081903  | 13.04706509 |
| C | 5.25653319  | 7.593940002  | 9.442127835 |
| C | 4.976672844 | 6.630568792  | 7.234677048 |
| H | 5.331762913 | 5.959803799  | 6.449033072 |
| C | 7.332853852 | 9.19868335   | 10.72929599 |
| C | 3.593839829 | 8.276707719  | 14.63250684 |
| H | 2.980182105 | 8.370643628  | 15.53185696 |
| C | 3.534275828 | 3.803760248  | 8.979204479 |
| H | 2.485860241 | 4.108332443  | 8.937334991 |
| C | 4.074712894 | 8.322711041  | 9.262472238 |
| H | 3.715697377 | 8.989179071  | 10.05166377 |
| C | 3.346859724 | 8.197645403  | 8.081000818 |
| H | 2.423383926 | 8.767085623  | 7.95060533  |
| C | 3.155777953 | 7.491399786  | 13.5672301  |
| H | 2.200806544 | 6.964286996  | 13.62872976 |
| C | 10.32787464 | 1.570727703  | 12.08403355 |
| H | 11.22267768 | 0.9644666    | 12.25438945 |
| C | 3.79649639  | 7.351967118  | 7.066697754 |
| H | 3.222998726 | 7.256912042  | 6.141212583 |
| C | 10.4838413  | 2.916685154  | 11.78940559 |
| H | 11.48786527 | 3.339427746  | 11.73480749 |
| C | 4.817806036 | 8.938955808  | 14.54737775 |
| H | 5.16489447  | 9.559910333  | 15.37699016 |
| C | 6.868748848 | 10.4983138   | 10.52148524 |
| H | 5.791924805 | 10.69561555  | 10.54552637 |
| C | 7.94131732  | 1.766863594  | 11.98865188 |
| H | 6.94088568  | 1.332343809  | 12.08531163 |
| C | 4.715425443 | 3.226208917  | 13.22995924 |
| H | 4.495463341 | 2.507857173  | 12.43531528 |
| C | 5.45030055  | 2.740479313  | 7.970802681 |
| H | 5.906708557 | 2.199934684  | 7.137950975 |
| C | 9.064675627 | 0.970829488  | 12.17803286 |
| H | 8.964755027 | -0.090447265 | 12.41319414 |

|   |             |             |             |
|---|-------------|-------------|-------------|
| C | 5.974052222 | 5.104755564 | 14.07751959 |
| H | 6.741367754 | 5.872271105 | 13.94106832 |
| C | 4.10884001  | 3.114831341 | 7.911917611 |
| H | 3.509074564 | 2.869341718 | 7.031914637 |
| C | 9.127145985 | 11.23688989 | 10.21442505 |
| H | 9.841585377 | 12.03686046 | 9.997776237 |
| C | 3.991541854 | 3.179257214 | 14.41963863 |
| H | 3.214546552 | 2.422280543 | 14.55237355 |
| C | 7.759172016 | 11.53632609 | 10.27540164 |
| H | 7.400666314 | 12.55454118 | 10.1136138  |
| C | 5.255422045 | 5.052392621 | 15.26912301 |
| H | 5.465765102 | 5.776491105 | 16.0594072  |
| C | 4.259094781 | 4.092713755 | 15.43910172 |
| H | 3.68751254  | 4.056195341 | 16.36991003 |

**Table S11.** XYZ coordinates of DFT optimized geometry of **2**.

| <b>Symbol</b> | <b>X</b>     | <b>Y</b>    | <b>Z</b>    |
|---------------|--------------|-------------|-------------|
| Co            | 1.200165467  | 4.016440883 | 11.23061012 |
| P             | 0.570172064  | 5.291700098 | 9.529386753 |
| N             | 0.653608406  | 2.573625339 | 10.13532559 |
| C             | -0.48136194  | 4.276962845 | 7.074590121 |
| H             | -0.560596908 | 5.307207774 | 6.712767994 |
| C             | 1.869155021  | 6.295481838 | 8.727306321 |
| C             | -3.0931374   | 7.978268213 | 10.37946088 |
| H             | -3.966097728 | 8.597923062 | 10.59946413 |
| C             | -0.780048901 | 1.918231334 | 6.769090122 |
| H             | -1.100154876 | 1.075801758 | 6.148752489 |
| C             | -1.153633156 | 7.506815625 | 9.016164437 |
| H             | -0.514878461 | 7.758826589 | 8.165130596 |
| C             | 0.032785483  | 4.035153719 | 8.349219018 |
| C             | 0.810854808  | 1.350555768 | 10.78727132 |
| H             | 0.554344518  | 0.409233457 | 10.29779162 |
| C             | 2.140499432  | 7.602120579 | 9.152993848 |
| H             | 1.488626491  | 8.083697475 | 9.886359658 |
| C             | -0.889534889 | 3.222321639 | 6.266699916 |
| H             | -1.291358269 | 3.40470583  | 5.268334263 |
| C             | -0.845838537 | 6.406258847 | 9.823998363 |
| C             | -2.800247252 | 6.875314685 | 11.1797904  |
| H             | -3.436460009 | 6.62647472  | 12.03209234 |
| C             | 0.148155829  | 2.716607321 | 8.876987343 |
| C             | 2.72179266   | 5.693333963 | 7.793807345 |
| H             | 2.518470608  | 4.673104117 | 7.456010794 |

|   |              |             |             |
|---|--------------|-------------|-------------|
| C | -1.678942121 | 6.097963879 | 10.90621902 |
| H | -1.441944046 | 5.244585794 | 11.54831243 |
| C | -2.270590449 | 8.291785554 | 9.297891889 |
| H | -2.501243564 | 9.152238389 | 8.664905713 |
| C | 3.237998038  | 8.296421665 | 8.651369115 |
| H | 3.439427605  | 9.31322933  | 8.996409222 |
| C | -0.278883315 | 1.657264626 | 8.034789036 |
| H | -0.217904806 | 0.62539943  | 8.382664744 |
| C | 4.084254418  | 7.689498394 | 7.724720572 |
| H | 4.949466042  | 8.231412976 | 7.335099197 |
| C | 3.823765085  | 6.388051893 | 7.297730195 |
| H | 4.482258977  | 5.907327418 | 6.570129979 |
| P | 1.911344895  | 5.448026801 | 12.77043507 |
| N | 1.572508644  | 2.68958581  | 12.52889006 |
| C | 2.779692654  | 4.679065005 | 15.38073673 |
| H | 2.959987188  | 5.735702721 | 15.60297793 |
| C | 0.683423262  | 6.648005241 | 13.40202839 |
| C | 5.790561202  | 7.799867002 | 11.87317433 |
| H | 6.714910941  | 8.340432189 | 11.6544455  |
| C | 2.790228395  | 2.370594551 | 16.02665326 |
| H | 2.983295518  | 1.597097751 | 16.77600131 |
| C | 3.78522463   | 7.540329843 | 13.19432188 |
| H | 3.141725352  | 7.882821136 | 14.00942349 |
| C | 2.291445952  | 4.314717    | 14.12538581 |
| C | 1.29589969   | 1.411443544 | 12.04454546 |
| H | 1.47218562   | 0.522731969 | 12.65339474 |
| C | 0.550829552  | 7.9179575   | 12.82603855 |
| H | 1.261518995  | 8.24779709  | 12.06390472 |
| C | 3.03307604   | 3.713284906 | 16.34753701 |
| H | 3.412568321  | 3.994416027 | 17.33163786 |
| C | 3.417112429  | 6.42538699  | 12.43061267 |
| C | 5.434959729  | 6.687035689 | 11.11338708 |
| H | 6.073314135  | 6.353320078 | 10.29223258 |
| C | 2.045591705  | 2.954722159 | 13.77993578 |
| C | -0.237855086 | 6.242826448 | 14.37476947 |
| H | -0.143022099 | 5.25346616  | 14.83127106 |
| C | 4.251807669  | 6.005231607 | 11.38871805 |
| H | 3.969306558  | 5.142967043 | 10.77755596 |
| C | 4.964708415  | 8.225644378 | 12.91357719 |
| H | 5.24165641   | 9.095728877 | 13.51393197 |
| C | -0.475728367 | 8.771271714 | 13.22054939 |
| H | -0.56740282  | 9.756947701 | 12.75817931 |

|   |              |             |             |
|---|--------------|-------------|-------------|
| C | 2.31099311   | 1.986922698 | 14.78378868 |
| H | 2.136256374  | 0.92955848  | 14.58105485 |
| C | -1.388250252 | 8.361562534 | 14.19170582 |
| H | -2.196248451 | 9.029729433 | 14.49965275 |
| C | -1.266978429 | 7.097613613 | 14.76696843 |
| H | -1.977791026 | 6.772148017 | 15.53046989 |

**Table S12.** XYZ coordinates of DFT optimized geometry of 5<sup>0</sup>s.

| <b>Symbol</b> | <b>X</b>     | <b>Y</b>    | <b>Z</b>    |
|---------------|--------------|-------------|-------------|
| Co            | 1.498713729  | 4.140233212 | 10.25176723 |
| P             | -0.065328918 | 5.512525505 | 9.558651025 |
| N             | 0.55106849   | 2.76161218  | 9.37569697  |
| C             | 0.434207179  | 6.897959934 | 8.484415574 |
| C             | -3.077793676 | 7.072570567 | 12.68337785 |
| H             | -3.792094641 | 7.423432166 | 13.43199708 |
| C             | -2.124736164 | 7.236143896 | 10.4699475  |
| H             | -2.092169365 | 7.723281502 | 9.491342916 |
| C             | -1.018891476 | 4.357246701 | 8.514961014 |
| C             | 1.053316354  | 1.563355367 | 9.552433614 |
| H             | 0.625439322  | 0.656281481 | 9.117367155 |
| C             | 0.681945502  | 8.162881022 | 9.033406308 |
| H             | 0.447764386  | 8.361057057 | 10.08236129 |
| C             | -1.25001877  | 6.183132896 | 10.76764987 |
| C             | -2.215312253 | 6.019446821 | 12.98237297 |
| H             | -2.245636196 | 5.542988489 | 13.96465307 |
| C             | -0.585396796 | 3.020441318 | 8.569830317 |
| C             | 0.744810113  | 6.663510721 | 7.139299775 |
| H             | 0.567025941  | 5.679062905 | 6.696924603 |
| C             | -1.302065432 | 5.577427642 | 12.02865137 |
| H             | -0.614376067 | 4.761451892 | 12.26761639 |
| C             | -3.032784609 | 7.679526052 | 11.42782767 |
| H             | -3.710713257 | 8.503034124 | 11.19232889 |
| C             | 1.221011513  | 9.178665357 | 8.248839749 |
| H             | 1.408834352  | 10.16052698 | 8.688975134 |
| C             | 1.521048914  | 8.940618622 | 6.908310463 |
| H             | 1.941956824  | 9.738441135 | 6.292097117 |
| C             | 1.281307407  | 7.683531528 | 6.355201111 |
| H             | 1.5117432    | 7.493195475 | 5.304415203 |
| P             | 2.774087545  | 5.45130054  | 11.45769704 |
| N             | 2.591651288  | 2.709055097 | 10.81586935 |
| C             | 5.072611862  | 4.500390697 | 12.88097492 |
| H             | 5.261707217  | 5.528219475 | 13.20128764 |



|   |              |             |             |
|---|--------------|-------------|-------------|
| C | 2.019521217  | 6.206923075 | 12.93537973 |
| C | 5.223649728  | 8.663555598 | 9.233971309 |
| H | 5.799923768  | 9.414175386 | 8.687844364 |
| C | 5.685310596  | 2.168737656 | 12.85184603 |
| H | 6.360653003  | 1.365331075 | 13.15420511 |
| C | 4.371695537  | 7.798179857 | 11.32284819 |
| H | 4.277736527  | 7.88093514  | 12.40927439 |
| C | 3.97002203   | 4.216879685 | 12.07108778 |
| C | 2.212397756  | 1.532814594 | 10.37620825 |
| H | 2.728249969  | 0.600118525 | 10.61900619 |
| C | 1.480717774  | 7.49809965  | 12.87151373 |
| H | 1.625699211  | 8.108925513 | 11.97687429 |
| C | 5.929341492  | 3.479201068 | 13.27414886 |
| H | 6.791935613  | 3.69972248  | 13.90624466 |
| C | 3.740303797  | 6.754243162 | 10.63408297 |
| C | 4.602960489  | 7.62372589  | 8.544004133 |
| H | 4.686947321  | 7.555395904 | 7.457256197 |
| C | 3.725641724  | 2.899429978 | 11.64495246 |
| C | 1.825329917  | 5.439940719 | 14.09027295 |
| H | 2.237720182  | 4.428976732 | 14.15443199 |
| C | 3.862065021  | 6.673572966 | 9.241647884 |
| H | 3.360304698  | 5.867467236 | 8.698445843 |
| C | 5.108756518  | 8.749497494 | 10.6220005  |
| H | 5.596522855  | 9.564138115 | 11.16223752 |
| C | 0.76420357   | 8.015884795 | 13.94663758 |
| H | 0.347565395  | 9.023594965 | 13.88463524 |
| C | 4.595073277  | 1.873904928 | 12.04371898 |
| H | 4.436354219  | 0.843032749 | 11.72396404 |
| C | 0.575111075  | 7.247770236 | 15.09450848 |
| H | 0.012968205  | 7.654504597 | 15.93838203 |
| C | 1.10918644   | 5.961912897 | 15.16588203 |
| H | 0.970422006  | 5.359077239 | 16.06632012 |
| C | -1.273501015 | 2.041378999 | 7.838775066 |
| C | -2.128767047 | 4.703472185 | 7.739426596 |
| C | -2.804969516 | 3.728270051 | 7.016219633 |
| C | -2.373020368 | 2.399524768 | 7.070174588 |
| H | -2.464425136 | 5.743262667 | 7.70401114  |
| H | -3.671976858 | 3.99765538  | 6.409544563 |
| H | -2.903176358 | 1.631309173 | 6.502930666 |
| H | -0.957713169 | 0.9973913   | 7.858600742 |

**Table S13.** XYZ coordinates of DFT optimized geometry of  $5^0_{os}$ .

| Symbol | X            | Y           | Z           |
|--------|--------------|-------------|-------------|
| Co     | 1.186317429  | 4.033085946 | 11.23286637 |
| P      | 0.574669948  | 5.322526731 | 9.533327333 |
| P      | 0.626404738  | 2.559499446 | 10.14046648 |
| O      | -0.469351356 | 4.300937879 | 7.081352593 |
| N      | -0.534404541 | 5.330772202 | 6.71933772  |
| C      | 1.890749291  | 6.290813942 | 8.734514822 |
| H      | -3.106913914 | 7.964921897 | 10.36768097 |
| C      | -3.987988617 | 8.575238892 | 10.57945493 |
| H      | -0.806502589 | 1.940221641 | 6.751918796 |
| C      | -1.137248705 | 1.110864059 | 6.122308076 |
| H      | -1.148732959 | 7.519562159 | 9.022625355 |
| C      | -0.503236963 | 7.783094262 | 8.180354376 |
| C      | 0.034953426  | 4.04337577  | 8.357497451 |
| C      | 0.783644576  | 1.387800675 | 10.76541031 |
| H      | 0.523365121  | 0.434312367 | 10.29845972 |
| C      | 2.158640692  | 7.603305526 | 9.145368291 |
| C      | 1.498693345  | 8.102161821 | 9.859578587 |
| C      | -0.888681449 | 3.250509232 | 6.271992156 |
| H      | -1.282828999 | 3.447632682 | 5.273360274 |
| C      | -0.845901868 | 6.4161833   | 9.829287155 |
| H      | -2.816531022 | 6.859867571 | 11.1664871  |
| C      | -3.463583652 | 6.601111403 | 12.00724849 |
| H      | 0.117844674  | 2.721511706 | 8.846976285 |
| C      | 2.751010041  | 5.666309556 | 7.822477886 |
| H      | 2.553242312  | 4.642057414 | 7.493823658 |
| C      | -1.687281003 | 6.092057501 | 10.90082247 |
| H      | -1.457721672 | 5.236357921 | 11.54311924 |
| C      | -2.274908201 | 8.292908562 | 9.297499249 |
| H      | -2.506071927 | 9.155143704 | 8.667953944 |
| C      | 3.264216487  | 8.283915009 | 8.643612367 |
| C      | 3.463622463  | 9.30736565  | 8.968489751 |
| H      | -0.311668387 | 1.669398676 | 8.021923796 |
| H      | -0.265639305 | 0.635427743 | 8.36678846  |
| C      | 4.117233355  | 7.65778997  | 7.735726877 |
| H      | 4.985558902  | 8.191813508 | 7.34310733  |
| C      | 3.859367263  | 6.350219683 | 7.326376697 |
| H      | 4.522721807  | 5.858090949 | 6.611534123 |
| C      | 1.897518949  | 5.478001302 | 12.76492439 |
| H      | 1.571855869  | 2.673278752 | 12.53097331 |
| C      | 2.787290191  | 4.696632198 | 15.36137235 |
| H      | 2.957019472  | 5.753878546 | 15.58294919 |

|   |              |             |             |
|---|--------------|-------------|-------------|
| C | 0.657947803  | 6.647101563 | 13.4072278  |
| H | 5.79354047   | 7.774779093 | 11.87348393 |
| C | 6.726449082  | 8.302519966 | 11.66178484 |
| H | 2.848132036  | 2.383327313 | 16.02480276 |
| C | 3.0658526    | 1.620308587 | 16.77589025 |
| H | 3.766712875  | 7.557522675 | 13.16881099 |
| N | 3.114471947  | 7.921211629 | 13.96747951 |
| C | 2.288876594  | 4.318888308 | 14.11313872 |
| H | 1.298846957  | 1.449699977 | 12.06625695 |
| C | 1.46250471   | 0.546536754 | 12.65987986 |
| H | 0.518498858  | 7.917588189 | 12.83298986 |
| C | 1.225465751  | 8.256943608 | 12.0717486  |
| H | 3.066976589  | 3.731387578 | 16.32271791 |
| H | 3.454847017  | 4.025098895 | 17.29985852 |
| C | 3.405643309  | 6.431611957 | 12.41727239 |
| H | 5.442088373  | 6.651946089 | 11.1258587  |
| C | 6.093470969  | 6.298630718 | 10.32376546 |
| H | 2.07078291   | 2.958342405 | 13.80664639 |
| C | -0.255628275 | 6.228779285 | 14.38199554 |
| H | -0.157594739 | 5.240543629 | 14.84013351 |
| C | 4.250444912  | 5.98372351  | 11.39475581 |
| H | 3.975342056  | 5.112577832 | 10.79234575 |
| C | 4.956008945  | 8.227058653 | 12.89319541 |
| H | 5.231968502  | 9.104999271 | 13.48160342 |
| C | -0.511872499 | 8.761645589 | 13.2356942  |
| H | -0.609672457 | 9.750419372 | 12.78210404 |
| C | 2.357273874  | 1.992026105 | 14.78502805 |
| H | 2.198025637  | 0.93148927  | 14.58467749 |
| C | -1.416889302 | 8.341431949 | 14.20988463 |
| C | -2.224902922 | 9.004948967 | 14.52654526 |
| H | -1.287345097 | 7.07677032  | 14.78169485 |
| C | -1.991410705 | 6.747383196 | 15.5491799  |
| H | 1.186317429  | 4.033085946 | 11.23286637 |
| C | 0.574669948  | 5.322526731 | 9.533327333 |
| H | 0.626404738  | 2.559499446 | 10.14046648 |
| C | -0.469351356 | 4.300937879 | 7.081352593 |
| H | -0.534404541 | 5.330772202 | 6.71933772  |
| C | 1.890749291  | 6.290813942 | 8.734514822 |
| C | -3.106913914 | 7.964921897 | 10.36768097 |
| H | -3.987988617 | 8.575238892 | 10.57945493 |
| C | -0.806502589 | 1.940221641 | 6.751918796 |
| C | -1.137248705 | 1.110864059 | 6.122308076 |

|   |              |             |             |
|---|--------------|-------------|-------------|
| H | -1.148732959 | 7.519562159 | 9.022625355 |
| H | -0.503236963 | 7.783094262 | 8.180354376 |
| H | 0.034953426  | 4.04337577  | 8.357497451 |
| O | 0.783644576  | 1.387800675 | 10.76541031 |
| C | 0.523365121  | 0.434312367 | 10.29845972 |
| C | 2.158640692  | 7.603305526 | 9.145368291 |
| C | 1.498693345  | 8.102161821 | 9.859578587 |
| H | -0.888681449 | 3.250509232 | 6.271992156 |
| H | -1.282828999 | 3.447632682 | 5.273360274 |
| C | -0.845901868 | 6.4161833   | 9.829287155 |
| H | -2.816531022 | 6.859867571 | 11.1664871  |
| H | -3.463583652 | 6.601111403 | 12.00724849 |
| H | 0.117844674  | 2.721511706 | 8.846976285 |
| H | 2.751010041  | 5.666309556 | 7.822477886 |
| H | 2.553242312  | 4.642057414 | 7.493823658 |
| H | -1.687281003 | 6.092057501 | 10.90082247 |

**Table S14.** XYZ coordinates of DFT optimized geometry of  $5^0\tau$ .

| <b>Symbol</b> | <b>X</b>     | <b>Y</b>    | <b>Z</b>    |
|---------------|--------------|-------------|-------------|
| Co            | 1.181052428  | 4.032870175 | 11.23460589 |
| P             | 0.573107818  | 5.3231221   | 9.533326041 |
| N             | 0.628675635  | 2.56034236  | 10.14117712 |
| C             | -0.469204683 | 4.300412123 | 7.081537386 |
| H             | -0.535460752 | 5.330174365 | 6.719530663 |
| C             | 1.890188997  | 6.291135441 | 8.736075728 |
| C             | -3.107871598 | 7.965680583 | 10.36911813 |
| H             | -3.988739818 | 8.576115575 | 10.58140506 |
| C             | -0.803106225 | 1.939345017 | 6.752176533 |
| H             | -1.132676109 | 1.109489716 | 6.122600084 |
| C             | -1.150352219 | 7.52034148  | 9.023049489 |
| H             | -0.505163627 | 7.783983697 | 8.180576782 |
| C             | 0.035020887  | 4.043437963 | 8.357875029 |
| C             | 0.787530085  | 1.387221382 | 10.76416029 |
| H             | 0.529688947  | 0.434110011 | 10.29531176 |
| C             | 2.157654826  | 7.603798886 | 9.146668409 |
| H             | 1.497078067  | 8.102852724 | 9.860132302 |
| C             | -0.886953881 | 3.249484773 | 6.272076518 |
| H             | -1.281189585 | 3.446034098 | 5.273370129 |
| C             | -0.84735313  | 6.416733038 | 9.829323953 |
| C             | -2.817384317 | 6.860363928 | 11.16753137 |
| H             | -3.46410841  | 6.601446345 | 12.0084911  |
| C             | 0.119712999  | 2.721818105 | 8.847603686 |

|   |              |             |             |
|---|--------------|-------------|-------------|
| C | 2.751148716  | 5.66624667  | 7.824982723 |
| H | 2.553623513  | 4.641842203 | 7.496667878 |
| C | -1.688402453 | 6.092438126 | 10.90106296 |
| H | -1.458961058 | 5.236347245 | 11.54298522 |
| C | -2.276290638 | 8.293777381 | 9.298629715 |
| H | -2.507644789 | 9.156192852 | 8.669403833 |
| C | 3.263601676  | 8.284230411 | 8.645527418 |
| H | 3.462737397  | 9.307822379 | 8.970117218 |
| C | -0.308224407 | 1.669239246 | 8.022285444 |
| H | -0.261072786 | 0.63531162  | 8.367066497 |
| C | 4.117352431  | 7.657742305 | 7.738570228 |
| H | 4.98600176   | 8.19163045  | 7.34648253  |
| C | 3.859874535  | 6.350014979 | 7.329506729 |
| H | 4.523827505  | 5.857649854 | 6.61538473  |
| P | 1.895449327  | 5.478821569 | 12.76507187 |
| N | 1.571589317  | 2.674287154 | 12.52879657 |
| C | 2.784837004  | 4.697039142 | 15.36108752 |
| H | 2.95350608   | 5.754358797 | 15.5831823  |
| C | 0.656912175  | 6.648791752 | 13.4076346  |
| C | 5.793577926  | 7.770510546 | 11.87080621 |
| H | 6.727167153  | 8.296909205 | 11.65876201 |
| C | 2.848073456  | 2.383436115 | 16.02282301 |
| H | 3.066477383  | 1.620107082 | 16.77339877 |
| C | 3.766028824  | 7.557316345 | 13.16564293 |
| H | 3.11402428   | 7.922683379 | 13.96373339 |
| C | 2.286866597  | 4.319436957 | 14.11259149 |
| C | 1.302393275  | 1.449242175 | 12.06425228 |
| H | 1.470218406  | 0.546615315 | 12.65735803 |
| C | 0.517853343  | 7.919280155 | 12.83327748 |
| H | 1.224726477  | 8.258241817 | 12.07178558 |
| C | 3.065566824  | 3.731514246 | 16.32178011 |
| H | 3.45318371   | 4.024910122 | 17.299114   |
| C | 3.404085198  | 6.430752705 | 12.4155298  |
| C | 5.441302546  | 6.646854426 | 11.12476671 |
| H | 6.092776249  | 6.291540424 | 10.3236319  |
| C | 2.070178587  | 2.959008196 | 13.80488276 |
| C | -0.256494911 | 6.231007874 | 14.38280029 |
| H | -0.158752126 | 5.242766049 | 14.84098444 |
| C | 4.248849277  | 5.980274942 | 11.39411936 |
| H | 3.973070563  | 5.1083199   | 10.79320619 |
| C | 4.956132979  | 8.225202451 | 12.88949499 |
| H | 5.232844977  | 9.10365357  | 13.47678644 |

|   |              |             |             |
|---|--------------|-------------|-------------|
| C | -0.511920924 | 8.763885924 | 13.23631578 |
| H | -0.609389761 | 9.752695495 | 12.78273545 |
| C | 2.357658183  | 1.992464348 | 14.7827979  |
| H | 2.199314409  | 0.931892688 | 14.58200869 |
| C | -1.416763765 | 8.344214382 | 14.21092493 |
| H | -2.224282137 | 9.00819896  | 14.52786731 |
| C | -1.287629274 | 7.079563482 | 14.78282675 |
| H | -1.991549364 | 6.750602704 | 15.55062556 |

**Table S15.** XYZ coordinates of DFT optimized geometry of 5<sup>THF</sup><sub>s</sub>.

| <b>Symbol</b> | <b>X</b>    | <b>Y</b>    | <b>Z</b>     |
|---------------|-------------|-------------|--------------|
| Co            | 7.225257694 | 8.38458121  | 4.509706963  |
| P             | 6.776086431 | 9.601699017 | 2.704327157  |
| P             | 8.904265086 | 7.143189175 | 3.742203899  |
| O             | 5.702272767 | 7.008133851 | 4.346289757  |
| N             | 7.942275231 | 7.980229453 | 6.197802641  |
| C             | 3.768470451 | 12.3742105  | 3.406199678  |
| H             | 3.085768376 | 13.02446532 | 2.85576792   |
| C             | 8.419369201 | 11.8608281  | 2.894839661  |
| H             | 7.786837502 | 12.1494148  | 3.738405139  |
| C             | 4.650885077 | 11.54685112 | 2.717940179  |
| H             | 4.65610865  | 11.54511287 | 1.625533539  |
| C             | 8.808129301 | 6.889276017 | 6.427520747  |
| C             | 9.367456553 | 6.291169467 | 5.283323785  |
| C             | 7.851659014 | 3.675253474 | 1.792813558  |
| H             | 7.549204791 | 2.661164963 | 2.064284658  |
| C             | 5.506343352 | 10.69417503 | 4.830596386  |
| C             | 10.42756156 | 8.037329629 | 3.279423285  |
| C             | 8.952226915 | 10.34931209 | 1.087020169  |
| H             | 8.734693397 | 9.45429016  | 0.498317556  |
| C             | 4.618959983 | 11.53439084 | 5.516632258  |
| H             | 4.577664371 | 11.53584303 | 6.606609917  |
| C             | 5.061756219 | 7.036303096 | 0.019468375  |
| H             | 4.748038924 | 5.989773044 | 0.020339595  |
| C             | 8.284313334 | 5.353769811 | 0.115804606  |
| H             | 8.308170686 | 5.666326355 | -0.930473624 |
| C             | 4.891774898 | 7.819805264 | -1.119234816 |
| H             | 4.431748921 | 7.393288498 | -2.013898802 |
| C             | 9.510879002 | 12.65403262 | 2.549215364  |
| H             | 9.724305381 | 13.55869115 | 3.123252384  |
| C             | 8.129497126 | 10.70364749 | 2.16263314   |
| C             | 3.523375615 | 6.156665055 | 4.237261591  |

|   |             |             |              |
|---|-------------|-------------|--------------|
| H | 2.596745645 | 6.227099808 | 4.822392662  |
| H | 3.238741678 | 5.957021499 | 3.194921784  |
| C | 5.908689265 | 9.695328043 | 0.014055607  |
| H | 6.261287436 | 10.73046018 | -0.006610661 |
| C | 10.66078444 | 9.268761516 | 3.905423969  |
| H | 9.911720617 | 9.682608738 | 4.586162482  |
| C | 10.57215585 | 4.714377006 | 6.655515608  |
| H | 11.26309396 | 3.874634778 | 6.752304433  |
| C | 5.651235377 | 7.579924353 | 1.159689966  |
| H | 5.806801271 | 6.956546942 | 2.043176827  |
| C | 3.762785061 | 12.36626382 | 4.802457428  |
| H | 3.071716558 | 13.0133979  | 5.347674733  |
| C | 7.414011821 | 8.70887841  | 7.193404168  |
| H | 7.668025635 | 8.54695855  | 8.242921947  |
| C | 10.00642188 | 5.295434748 | 7.792744171  |
| H | 10.25166387 | 4.901852062 | 8.781936347  |
| N | 6.393251246 | 9.784971641 | 5.443545356  |
| C | 10.04294213 | 11.14441983 | 0.743712676  |
| H | 10.67726653 | 10.86074614 | -0.098894003 |
| C | 9.134654401 | 6.374452566 | 7.689675931  |
| H | 8.711388942 | 6.804158574 | 8.598398099  |
| C | 4.483218094 | 5.066362735 | 4.766502813  |
| H | 4.735508382 | 4.348847333 | 3.972933433  |
| H | 4.063699878 | 4.498445024 | 5.607540356  |
| C | 12.78722047 | 9.447355753 | 2.779606607  |
| H | 13.70864937 | 10.00001036 | 2.581401354  |
| C | 8.218841213 | 4.575864048 | 2.791594619  |
| H | 8.204207347 | 4.251100217 | 3.834921542  |
| C | 8.643749154 | 6.256218352 | 1.112548705  |
| H | 8.944087837 | 7.269451863 | 0.834053699  |
| C | 5.321032608 | 9.148271654 | -1.12272696  |
| H | 5.200822262 | 9.761008753 | -2.01902071  |
| C | 11.83933827 | 9.965861292 | 3.661232162  |
| H | 12.01154508 | 10.92516547 | 4.154034364  |
| C | 7.881280154 | 4.062861653 | 0.454312065  |
| H | 7.595773798 | 3.35492083  | -0.327226126 |
| C | 4.338343519 | 7.447244341 | 4.336899685  |
| H | 4.138914534 | 7.996819143 | 5.273774374  |
| C | 6.067904441 | 8.916549562 | 1.170770571  |
| C | 10.255021   | 5.219900522 | 5.398687347  |
| H | 10.70248459 | 4.78262051  | 4.501595035  |
| C | 12.56040905 | 8.222778574 | 2.154149803  |

|   |             |             |             |
|---|-------------|-------------|-------------|
| H | 13.30382719 | 7.811983848 | 1.467120396 |
| C | 11.38830083 | 7.512014707 | 2.408551711 |
| H | 11.22962592 | 6.545466481 | 1.923720762 |
| C | 6.551313869 | 9.710187341 | 6.774721056 |
| H | 6.066465448 | 10.40080181 | 7.467769643 |
| C | 8.616459439 | 5.877773538 | 2.461833357 |
| C | 10.32390872 | 12.29742023 | 1.474288535 |
| H | 11.17901963 | 12.92141402 | 1.204181778 |
| C | 5.522496192 | 10.71648641 | 3.42326226  |
| C | 5.724315827 | 5.848888768 | 5.183555519 |
| H | 5.682517273 | 6.170836155 | 6.239617345 |
| H | 6.673772093 | 5.327148424 | 5.01809404  |
| H | 4.204862051 | 8.136156197 | 3.492787677 |

**Table S16.** XYZ coordinates of DFT optimized geometry of 5<sup>TH</sup>os.

| <b>Symbol</b> | <b>X</b>    | <b>Y</b>    | <b>Z</b>     |
|---------------|-------------|-------------|--------------|
| Co            | 7.324461914 | 8.437664358 | 4.483647098  |
| P             | 6.807849377 | 9.66180656  | 2.691732861  |
| P             | 8.974797958 | 7.129308813 | 3.756978738  |
| O             | 5.674222919 | 7.007744424 | 4.376541341  |
| N             | 7.890913906 | 7.8802117   | 6.244175359  |
| C             | 3.838709915 | 12.46686565 | 3.405869944  |
| H             | 3.200177156 | 13.15587664 | 2.849812265  |
| C             | 8.42633762  | 11.93881117 | 2.8436373    |
| H             | 7.785797406 | 12.23850277 | 3.677590103  |
| C             | 4.741910062 | 11.65116366 | 2.730360722  |
| H             | 4.809400342 | 11.70225597 | 1.641032542  |
| C             | 8.785472689 | 6.827162541 | 6.458762762  |
| C             | 9.419771715 | 6.294932894 | 5.315429318  |
| C             | 7.907702512 | 3.628511833 | 1.878944842  |
| H             | 7.633479376 | 2.611280814 | 2.167853678  |
| C             | 5.466815904 | 10.68232793 | 4.845221041  |
| C             | 10.48865857 | 8.014540594 | 3.257035569  |
| C             | 8.974483238 | 10.40160645 | 1.060723301  |
| H             | 8.765375839 | 9.494293645 | 0.487621746  |
| C             | 4.555509822 | 11.51263382 | 5.517570466  |
| H             | 4.457782733 | 11.46705673 | 6.603353798  |
| C             | 5.050147305 | 7.056302083 | 0.080384527  |
| H             | 4.73034544  | 6.011884097 | 0.106225502  |
| C             | 8.246418257 | 5.302549202 | 0.174818815  |
| H             | 8.226513078 | 5.606883969 | -0.873982756 |
| C             | 4.867575477 | 7.818803104 | -1.070641305 |



|   |             |             |              |
|---|-------------|-------------|--------------|
| H | 4.392141667 | 7.377739457 | -1.950067703 |
| C | 9.514988688 | 12.73318434 | 2.489234168  |
| H | 9.720853873 | 13.64848398 | 3.048997399  |
| C | 8.146001777 | 10.76879278 | 2.128284715  |
| C | 3.488876588 | 6.180470623 | 4.205030614  |
| H | 2.552965557 | 6.237091836 | 4.777098153  |
| H | 3.219262888 | 6.02620124  | 3.150866944  |
| C | 5.909156128 | 9.711190307 | 0.011319551  |
| H | 6.26524849  | 10.74435078 | -0.034036448 |
| C | 10.72124134 | 9.254728237 | 3.866647648  |
| H | 9.992531888 | 9.665289509 | 4.572714915  |
| C | 10.65620349 | 4.73722056  | 6.68733637   |
| H | 11.38779113 | 3.932932188 | 6.784775791  |
| C | 5.658414156 | 7.618461945 | 1.20150142   |
| H | 5.820319244 | 7.014415969 | 2.097532396  |
| C | 3.75519504  | 12.39291106 | 4.79815308   |
| H | 3.047812857 | 13.02952395 | 5.334952186  |
| C | 7.276570419 | 8.568096979 | 7.211543053  |
| H | 7.455415421 | 8.375232522 | 8.272929088  |
| C | 10.01240654 | 5.245405936 | 7.818729954  |
| H | 10.23772129 | 4.829577534 | 8.803652813  |
| N | 6.300571137 | 9.748814909 | 5.467885403  |
| C | 10.05970171 | 11.19905219 | 0.707349766  |
| H | 10.69753668 | 10.90771132 | -0.129976331 |
| C | 9.089202216 | 6.279312081 | 7.715712258  |
| H | 8.608261507 | 6.65657992  | 8.619421799  |
| C | 4.429351077 | 5.060588679 | 4.705345343  |
| H | 4.677170189 | 4.364097755 | 3.891814142  |
| H | 3.994890454 | 4.471832043 | 5.524416134  |
| C | 12.8045332  | 9.463441832 | 2.671389925  |
| H | 13.70851282 | 10.03118886 | 2.438589781  |
| C | 8.294803619 | 4.542839004 | 2.857615667  |
| H | 8.32575219  | 4.228297119 | 3.903759815  |
| C | 8.623832013 | 6.219525267 | 1.151113037  |
| H | 8.892370406 | 7.237315962 | 0.856134795  |
| C | 5.303138054 | 9.14479249  | -1.106192573 |
| H | 5.172476782 | 9.740594432 | -2.012369883 |
| C | 11.87736307 | 9.972382228 | 3.580627414  |
| H | 12.047716   | 10.93832549 | 4.060817514  |
| C | 7.880821889 | 4.006909092 | 0.537815086  |
| H | 7.579883137 | 3.287853152 | -0.227612528 |
| C | 4.318630024 | 7.456026165 | 4.368973261  |

|   |             |             |             |
|---|-------------|-------------|-------------|
| H | 4.106298433 | 7.967867314 | 5.32467603  |
| C | 6.080450834 | 8.953097081 | 1.179634585 |
| C | 10.3605172  | 5.270370253 | 5.4365056   |
| H | 10.86369983 | 4.885995441 | 4.544521725 |
| C | 12.57848511 | 8.231423444 | 2.060537687 |
| H | 13.30621322 | 7.830336415 | 1.351378283 |
| C | 11.42699916 | 7.502086032 | 2.355677707 |
| H | 11.26445975 | 6.532521448 | 1.877825775 |
| C | 6.40978268  | 9.582462218 | 6.789403442 |
| H | 5.875438534 | 10.21193923 | 7.506468492 |
| C | 8.65260903  | 5.849184737 | 2.502473442 |
| C | 10.3318841  | 12.36507113 | 1.421610704 |
| H | 11.18298396 | 12.99085687 | 1.143037413 |
| C | 5.555562734 | 10.76554351 | 3.438018371 |
| C | 5.678997457 | 5.81465177  | 5.156529524 |
| H | 5.636823245 | 6.082950266 | 6.227862956 |
| H | 6.622074278 | 5.287157319 | 4.970740827 |
| H | 4.198128193 | 8.182477911 | 3.554196936 |

**Table S17.** XYZ coordinates of DFT optimized geometry of 5<sup>THF</sup><sub>T</sub>.

| <b>Symbol</b> | <b>X</b>    | <b>Y</b>    | <b>Z</b>    |
|---------------|-------------|-------------|-------------|
| Co            | 7.355949991 | 8.463422798 | 4.482427839 |
| P             | 6.814258673 | 9.679426501 | 2.687317756 |
| P             | 8.995584612 | 7.132914757 | 3.759216886 |
| O             | 5.663584132 | 7.007118521 | 4.394279572 |
| N             | 7.860542262 | 7.847290262 | 6.245421626 |
| C             | 3.860119684 | 12.49499391 | 3.409256146 |
| H             | 3.237380322 | 13.2001406  | 2.855607477 |
| C             | 8.431222921 | 11.95645992 | 2.8295132   |
| H             | 7.790087615 | 12.2589105  | 3.662149187 |
| C             | 4.769545289 | 11.68584531 | 2.734880145 |
| H             | 4.858871872 | 11.75975279 | 1.648369761 |
| C             | 8.764583445 | 6.806605708 | 6.458446828 |
| C             | 9.428803839 | 6.299099089 | 5.319492183 |
| C             | 7.91691005  | 3.631705728 | 1.891847243 |
| H             | 7.645769558 | 2.614477602 | 2.183570345 |
| C             | 5.450361536 | 10.67009087 | 4.843932524 |
| C             | 10.50850696 | 8.014087811 | 3.251714114 |
| C             | 8.978525966 | 10.41448666 | 1.049970596 |
| H             | 8.768946409 | 9.505886846 | 0.479025574 |
| C             | 4.529471142 | 11.492791   | 5.514719183 |
| H             | 4.409319256 | 11.423743   | 6.597057482 |

|   |             |             |              |
|---|-------------|-------------|--------------|
| C | 5.047521048 | 7.048638033 | 0.109603884  |
| H | 4.725167164 | 6.005379178 | 0.147802836  |
| C | 8.243863    | 5.303958403 | 0.183264241  |
| H | 8.217845147 | 5.606615174 | -0.865872477 |
| C | 4.863554566 | 7.798992856 | -1.049180319 |
| H | 4.3845411   | 7.3495148   | -1.922368328 |
| C | 9.520897978 | 12.74901941 | 2.473648548  |
| H | 9.727425051 | 13.6655001  | 3.031219439  |
| C | 8.149888081 | 10.78506583 | 2.116490243  |
| C | 3.479285018 | 6.179588835 | 4.203774406  |
| H | 2.541083505 | 6.229724479 | 4.772765111  |
| H | 3.213463203 | 6.035918861 | 3.147102504  |
| C | 5.911308692 | 9.701238745 | 0.009263549  |
| H | 6.267790597 | 10.73372353 | -0.047678238 |
| C | 10.74245199 | 9.255000227 | 3.859499596  |
| H | 10.01962553 | 9.664022303 | 4.573210148  |
| C | 10.66466121 | 4.74084052  | 6.69217258   |
| H | 11.40746409 | 3.947272147 | 6.792242755  |
| C | 5.660015972 | 7.621504867 | 1.222951689  |
| H | 5.821618083 | 7.028078546 | 2.126215733  |
| C | 3.748931785 | 12.39220625 | 4.798247676  |
| H | 3.034886678 | 13.02205004 | 5.334243323  |
| C | 7.258225084 | 8.551602483 | 7.209720295  |
| H | 7.449019774 | 8.372932478 | 8.271677376  |
| C | 9.987781335 | 5.21959424  | 7.817735135  |
| H | 10.19766956 | 4.789780141 | 8.800098029  |
| N | 6.265281142 | 9.724233418 | 5.465529787  |
| C | 10.06442347 | 11.21026239 | 0.695181604  |
| H | 10.70204157 | 10.91684732 | -0.14158778  |
| C | 9.05042234  | 6.23983776  | 7.712497303  |
| H | 8.540707672 | 6.590655909 | 8.611100431  |
| C | 4.418739373 | 5.055339184 | 4.695904511  |
| H | 4.671642534 | 4.368782933 | 3.875408147  |
| H | 3.981559457 | 4.456230089 | 5.505985711  |
| C | 12.81466667 | 9.470918555 | 2.647548939  |
| H | 13.71479536 | 10.04167394 | 2.407317614  |
| C | 8.30764381  | 4.547957563 | 2.867248144  |
| H | 8.344474916 | 4.236019409 | 3.914018795  |
| C | 8.624621037 | 6.223101972 | 1.156138814  |
| H | 8.889695302 | 7.241063526 | 0.858548461  |
| C | 5.301452258 | 9.123716547 | -1.100400109 |
| H | 5.168940859 | 9.709972124 | -2.012502905 |

|   |             |             |              |
|---|-------------|-------------|--------------|
| C | 11.89324339 | 9.97727828  | 3.564164387  |
| H | 12.0642047  | 10.94388156 | 4.04274154   |
| C | 7.882630979 | 4.00817863  | 0.550339393  |
| H | 7.579142565 | 3.287388242 | -0.212433708 |
| C | 4.308885992 | 7.453790398 | 4.383706295  |
| H | 4.089522958 | 7.957267832 | 5.342257801  |
| C | 6.08446127  | 8.954984947 | 1.18479048   |
| C | 10.38428361 | 5.28818638  | 5.444375025  |
| H | 10.91069479 | 4.92568576  | 4.556582398  |
| C | 12.58774134 | 8.238102002 | 2.038654919  |
| H | 13.3112483  | 7.839439354 | 1.323834542  |
| C | 11.44073151 | 7.505030105 | 2.342347141  |
| H | 11.276445   | 6.535663357 | 1.864653147  |
| C | 6.392794579 | 9.566932584 | 6.787167391  |
| H | 5.875585277 | 10.20918104 | 7.505772031  |
| C | 8.661202055 | 5.85404007  | 2.507631646  |
| C | 10.3375355  | 12.37771093 | 1.407043772  |
| H | 11.18917311 | 13.00213935 | 1.127077406  |
| C | 5.562986556 | 10.77882693 | 3.439213089  |
| C | 5.665089118 | 5.80709847  | 5.16131271   |
| H | 5.615877319 | 6.062926559 | 6.235467884  |
| H | 6.609498585 | 5.281258014 | 4.976393838  |
| H | 4.19125786  | 8.187139427 | 3.574529015  |

**Table S18.** XYZ coordinates of DFT optimized geometry of  $5^{2\text{THF}}_s$ .

| <b>Symbol</b> | <b>X</b>    | <b>Y</b>    | <b>Z</b>     |
|---------------|-------------|-------------|--------------|
| Co            | 7.065585848 | 8.963086798 | 4.151398303  |
| P             | 7.225839888 | 8.9367303   | 1.817341522  |
| P             | 8.738019939 | 7.489326148 | 4.855137533  |
| O             | 5.674049838 | 7.495881118 | 4.158228069  |
| N             | 6.725800397 | 9.185128054 | 6.006022535  |
| C             | 4.24674579  | 11.14115233 | 0.007475906  |
| H             | 3.878874117 | 11.36525369 | -0.994851097 |
| C             | 8.64529744  | 10.99133288 | 0.465562812  |
| H             | 7.722509988 | 11.57589667 | 0.500459033  |
| C             | 5.332470226 | 10.29960872 | 0.189775018  |
| H             | 5.82295309  | 9.855386861 | -0.680562928 |
| C             | 7.466632674 | 8.612777068 | 6.994095911  |
| C             | 8.531484188 | 7.739737175 | 6.635702742  |
| C             | 7.97184518  | 3.441409331 | 5.201970386  |
| H             | 7.612274741 | 2.75022811  | 5.967615522  |
| C             | 5.174580085 | 10.54323345 | 2.631877033  |
| C             | 10.51370702 | 7.73427547  | 4.463572637  |

|   |             |             |              |
|---|-------------|-------------|--------------|
| C | 9.863091056 | 8.955304542 | 0.907847365  |
| H | 9.907402788 | 7.938602064 | 1.307336413  |
| C | 4.07264419  | 11.41125992 | 2.420678951  |
| H | 3.557395968 | 11.85679883 | 3.272053637  |
| C | 6.365951052 | 5.079610188 | 0.643865066  |
| H | 6.034460635 | 4.156119932 | 1.125157243  |
| C | 8.815578563 | 3.851295597 | 2.978916641  |
| H | 9.112147135 | 3.486712836 | 1.992926087  |
| C | 6.581806547 | 5.118928675 | -0.730722577 |
| H | 6.406201853 | 4.229372137 | -1.340143726 |
| C | 9.776649261 | 11.53064753 | -0.146205468 |
| H | 9.732708322 | 12.53615456 | -0.570782105 |
| C | 8.682626017 | 9.702797861 | 1.010767182  |
| C | 3.785217267 | 6.202764345 | 3.606774181  |
| H | 2.701689612 | 6.30651085  | 3.752761884  |
| H | 3.936630638 | 5.569916182 | 2.721667529  |
| C | 7.261330575 | 7.430888719 | -0.554954954 |
| H | 7.641794839 | 8.336826296 | -1.033871245 |
| C | 10.97053004 | 8.90724905  | 3.855345103  |
| H | 10.2546998  | 9.664079777 | 3.536879673  |
| C | 9.140146968 | 7.412548438 | 8.959974717  |
| H | 9.785456841 | 6.966326067 | 9.718059101  |
| C | 6.586097816 | 6.216791923 | 1.419664078  |
| H | 6.439500742 | 6.171155625 | 2.498214286  |
| C | 3.631185548 | 11.69462577 | 1.139292794  |
| H | 2.775635648 | 12.36355694 | 1.01400683   |
| C | 5.678357738 | 10.08359555 | 6.192057613  |
| H | 5.338397853 | 10.34537155 | 7.195023106  |
| C | 8.079642805 | 8.254282249 | 9.324583675  |
| H | 7.895146932 | 8.46150511  | 10.38203668  |
| N | 5.641758212 | 10.18730836 | 3.859951503  |
| C | 10.98989686 | 9.492173554 | 0.293249     |
| H | 11.90343929 | 8.897053984 | 0.226513764  |
| C | 7.258214216 | 8.842884458 | 8.378186668  |
| H | 6.452875468 | 9.500304075 | 8.706821389  |
| C | 4.494566829 | 5.618557364 | 4.845773913  |
| H | 5.158193522 | 4.785789209 | 4.567991084  |
| H | 3.796477826 | 5.249946774 | 5.609028928  |
| C | 13.25156724 | 8.128344802 | 4.004210941  |
| H | 14.31891954 | 8.282709845 | 3.829400978  |
| C | 8.083911779 | 4.800059171 | 5.497742988  |
| H | 7.826831755 | 5.155682053 | 6.49878135   |

|   |             |             |              |
|---|-------------|-------------|--------------|
| C | 8.919907429 | 5.207419814 | 3.270365104  |
| H | 9.304005644 | 5.890019801 | 2.507604879  |
| C | 7.036276105 | 6.29586899  | -1.327511431 |
| H | 7.221024505 | 6.329231286 | -2.403534603 |
| C | 12.33220957 | 9.103331809 | 3.627769457  |
| H | 12.67025449 | 10.02282863 | 3.143267338  |
| C | 8.334574259 | 2.96563273  | 3.943398162  |
| H | 8.254068359 | 1.89981911  | 3.717437279  |
| C | 4.430402347 | 7.577115103 | 3.419695737  |
| H | 3.826574199 | 8.384104071 | 3.859159745  |
| C | 7.021876883 | 7.406705632 | 0.828704242  |
| C | 9.355965727 | 7.165596701 | 7.613692511  |
| H | 10.1826037  | 6.51731596  | 7.311056558  |
| C | 12.80436939 | 6.945079482 | 4.594018642  |
| H | 13.51878594 | 6.169157386 | 4.877926771  |
| C | 11.44600402 | 6.74532574  | 4.817648306  |
| H | 11.1104877  | 5.802152086 | 5.256409912  |
| C | 5.115040791 | 10.60006833 | 5.080907469  |
| H | 4.290296874 | 11.3128806  | 5.121523031  |
| C | 8.546152427 | 5.697392265 | 4.528540428  |
| C | 10.95085038 | 10.78487285 | -0.229467158 |
| H | 11.83451568 | 11.20779882 | -0.713118566 |
| C | 5.80781044  | 10.00789745 | 1.475933242  |
| C | 5.319380118 | 6.783776477 | 5.364083543  |
| H | 4.737476825 | 7.46080824  | 6.009019276  |
| H | 6.233749868 | 6.496555302 | 5.887299807  |
| H | 4.656966799 | 7.830765682 | 2.378809977  |
| O | 8.307264506 | 10.55437842 | 4.28127576   |
| C | 9.024186169 | 10.90580242 | 5.490418977  |
| C | 7.985632364 | 11.82944866 | 3.684321565  |
| C | 9.93039377  | 12.06609561 | 5.074108756  |
| H | 8.285701145 | 11.20489629 | 6.248073512  |
| H | 9.561216525 | 10.02246928 | 5.851085961  |
| C | 9.300735279 | 12.58421249 | 3.764813182  |
| H | 7.61867347  | 11.66210806 | 2.669838157  |
| H | 7.186354921 | 12.30095165 | 4.277902438  |
| H | 10.96347542 | 11.72689955 | 4.917131492  |
| H | 9.954966252 | 12.83267468 | 5.860063321  |
| H | 9.928007174 | 12.33198603 | 2.896274164  |
| H | 9.143904578 | 13.67110095 | 3.759817973  |

**Table S19.** XYZ coordinates of DFT optimized geometry of 5<sup>2THF</sup><sub>os</sub>.

| <b>Symbol</b> | <b>X</b>    | <b>Y</b>    | <b>Z</b>     |
|---------------|-------------|-------------|--------------|
| Co            | 7.168819874 | 8.870326395 | 4.050621551  |
| P             | 7.297206816 | 8.889596484 | 1.789904767  |
| P             | 8.770665826 | 7.444985212 | 4.776689013  |
| O             | 5.36711895  | 7.284725625 | 4.14783058   |
| N             | 6.794353809 | 9.141297836 | 5.943036531  |
| C             | 4.209981931 | 10.95572346 | -0.040381452 |
| H             | 3.820431373 | 11.13440767 | -1.044325808 |
| C             | 8.604694625 | 11.04008477 | 0.466914358  |
| H             | 7.647481328 | 11.56710407 | 0.479780533  |
| C             | 5.328938434 | 10.15017139 | 0.144544606  |
| H             | 5.81810135  | 9.693689604 | -0.720079446 |
| C             | 7.557869114 | 8.584100935 | 6.962820517  |
| C             | 8.613658791 | 7.728373757 | 6.574742677  |
| C             | 7.866528376 | 3.442614383 | 5.291776014  |
| H             | 7.504121117 | 2.790862414 | 6.090044752  |
| C             | 5.185697487 | 10.46993758 | 2.557688927  |
| C             | 10.54862818 | 7.673186221 | 4.41133249   |
| C             | 9.93709915  | 9.083815359 | 0.938510586  |
| H             | 10.03454045 | 8.070167736 | 1.337405035  |
| C             | 4.061395792 | 11.29233575 | 2.35702959   |
| H             | 3.543916708 | 11.74098102 | 3.206234266  |
| C             | 6.293711006 | 5.104092128 | 0.594881434  |
| H             | 5.855897505 | 4.22005824  | 1.065146917  |
| C             | 8.625520661 | 3.753446959 | 3.023046435  |
| H             | 8.85282181  | 3.350753415 | 2.033403505  |
| C             | 6.627042869 | 5.08831952  | -0.757475044 |
| H             | 6.439111286 | 4.195184963 | -1.358181584 |
| C             | 9.721168693 | 11.66127795 | -0.092518657 |
| H             | 9.628722201 | 12.66887101 | -0.504358464 |
| C             | 8.705128929 | 9.748355418 | 0.995774462  |
| C             | 3.453979531 | 6.027057149 | 3.62089093   |
| H             | 2.370512197 | 6.146999894 | 3.758303275  |
| H             | 3.601757191 | 5.383453635 | 2.742331603  |
| C             | 7.449879908 | 7.353545219 | -0.582924099 |
| H             | 7.919969419 | 8.223192909 | -1.050214559 |
| C             | 10.99248051 | 8.915183946 | 3.944393045  |
| H             | 10.26368836 | 9.698622989 | 3.72584646   |
| C             | 9.281734158 | 7.454805467 | 8.885184867  |
| H             | 9.955858693 | 7.030427524 | 9.631540671  |
| C             | 6.533150587 | 6.243754994 | 1.360654856  |

|   |             |             |              |
|---|-------------|-------------|--------------|
| H | 6.295105376 | 6.248798423 | 2.426519928  |
| C | 3.588254443 | 11.52885846 | 1.072733996  |
| H | 2.710247284 | 12.16481961 | 0.936555243  |
| C | 5.79478761  | 10.00726369 | 6.124859792  |
| H | 5.452795249 | 10.30818188 | 7.119442161  |
| C | 8.223116727 | 8.280505954 | 9.27459678   |
| H | 8.065410157 | 8.498061525 | 10.33373471  |
| N | 5.699809142 | 10.12591199 | 3.803022116  |
| C | 11.04873251 | 9.701867236 | 0.374238564  |
| H | 12.00235899 | 9.170095046 | 0.340190664  |
| C | 7.369867154 | 8.841906172 | 8.333465589  |
| H | 6.563299965 | 9.495466527 | 8.668738174  |
| C | 4.150233239 | 5.439929737 | 4.868833869  |
| H | 4.774317514 | 4.574096004 | 4.600918302  |
| H | 3.443788529 | 5.115114885 | 5.644749232  |
| C | 13.2771015  | 8.133029472 | 3.988387742  |
| H | 14.34285594 | 8.312328299 | 3.827671018  |
| C | 8.062038993 | 4.800367054 | 5.545352355  |
| H | 7.859917169 | 5.195474444 | 6.544000719  |
| C | 8.812178017 | 5.109453476 | 3.272416291  |
| H | 9.18656593  | 5.753332606 | 2.471534967  |
| C | 7.211757394 | 6.211739859 | -1.343380115 |
| H | 7.485921855 | 6.198416789 | -2.400731682 |
| C | 12.35199303 | 9.144178997 | 3.738607586  |
| H | 12.68594742 | 10.11672987 | 3.368415671  |
| C | 8.146070726 | 2.917524057 | 4.031666739  |
| H | 7.998640921 | 1.852552917 | 3.837628587  |
| C | 4.143194004 | 7.385345352 | 3.426493277  |
| H | 3.542843534 | 8.211652243 | 3.848795027  |
| C | 7.099859475 | 7.38142037  | 0.775081349  |
| C | 9.472059646 | 7.185249447 | 7.533928157  |
| H | 10.3020973  | 6.54674602  | 7.21987715   |
| C | 12.83985555 | 6.885042221 | 4.434022431  |
| H | 13.56088565 | 6.085501247 | 4.619058313  |
| C | 11.48312547 | 6.652939061 | 4.642828617  |
| H | 11.15169022 | 5.666808009 | 4.979040496  |
| C | 5.197303491 | 10.5275993  | 4.972810168  |
| H | 4.358805534 | 11.22675632 | 5.041881892  |
| C | 8.52843306  | 5.647720917 | 4.534511753  |
| C | 10.94426897 | 10.99525016 | -0.137669795 |
| H | 11.81639173 | 11.48031422 | -0.582349801 |
| C | 5.828816816 | 9.915687091 | 1.427733491  |



|   |             |             |             |
|---|-------------|-------------|-------------|
| C | 5.037895637 | 6.588234604 | 5.341290458 |
| H | 4.497648174 | 7.268844783 | 6.026144323 |
| H | 5.967111599 | 6.273250663 | 5.828071576 |
| H | 4.371948554 | 7.628963302 | 2.380481917 |
| O | 8.492876432 | 10.86380135 | 4.405541791 |
| C | 9.200094775 | 11.20251281 | 5.59343234  |
| C | 8.199460632 | 12.1038538  | 3.779672585 |
| C | 10.12710066 | 12.36042979 | 5.191158789 |
| H | 8.475652809 | 11.51219829 | 6.36861555  |
| H | 9.72535214  | 10.30871606 | 5.955550766 |
| C | 9.507838423 | 12.88319533 | 3.87565787  |
| H | 7.863535785 | 11.90524809 | 2.756320932 |
| H | 7.378888623 | 12.60750254 | 4.325310258 |
| H | 11.15572185 | 12.00542724 | 5.036054873 |
| H | 10.16459052 | 13.13012658 | 5.974228577 |
| H | 10.1467637  | 12.63699294 | 3.013803419 |
| H | 9.348981541 | 13.97017524 | 3.874054438 |

**Table S20.** XYZ coordinates of DFT optimized geometry of  $5^{2\text{THF}}_{\text{T}}$ .

| <b>Symbol</b> | <b>X</b>    | <b>Y</b>    | <b>Z</b>     |
|---------------|-------------|-------------|--------------|
| Co            | 7.168329528 | 8.87231709  | 4.052146239  |
| P             | 7.298799118 | 8.889591894 | 1.790661057  |
| P             | 8.77215575  | 7.446867282 | 4.775753503  |
| O             | 5.368697481 | 7.281046305 | 4.148455673  |
| N             | 6.793328144 | 9.140617624 | 5.941065533  |
| C             | 4.212582213 | 10.95675828 | -0.039482654 |
| H             | 3.823929539 | 11.13677315 | -1.043533147 |
| C             | 8.607605037 | 11.03790662 | 0.465396861  |
| H             | 7.650705281 | 11.56552941 | 0.477510583  |
| C             | 5.331783827 | 10.15170042 | 0.145411337  |
| H             | 5.822089265 | 9.696573105 | -0.719285214 |
| C             | 7.556882327 | 8.583588623 | 6.961146254  |
| C             | 8.614065873 | 7.729477218 | 6.573521186  |
| C             | 7.869540587 | 3.443981478 | 5.288008093  |
| H             | 7.507840657 | 2.791497458 | 6.08600093   |
| C             | 5.18636008  | 10.46792006 | 2.55898354   |
| C             | 10.55018111 | 7.675290701 | 4.410865453  |
| C             | 9.938761115 | 9.081360759 | 0.93905647   |
| H             | 10.03563692 | 8.068049038 | 1.338924673  |
| C             | 4.061514085 | 11.28962996 | 2.358342382  |
| H             | 3.542657189 | 11.7365063  | 3.207608794  |
| C             | 6.290768343 | 5.105027885 | 0.595389964  |

|   |             |             |              |
|---|-------------|-------------|--------------|
| H | 5.851147013 | 4.221631279 | 1.065158768  |
| C | 8.62751378  | 3.756651589 | 3.019184558  |
| H | 8.854605471 | 3.354725645 | 2.02918704   |
| C | 6.625250055 | 5.08876773  | -0.756666238 |
| H | 6.436444317 | 4.195958565 | -1.357582771 |
| C | 9.724426988 | 11.65768481 | -0.094902215 |
| H | 9.632571737 | 12.6648285  | -0.507971621 |
| C | 8.70724375  | 9.746798661 | 0.995845839  |
| C | 3.449536689 | 6.031191568 | 3.62624805   |
| H | 2.366453031 | 6.1547722   | 3.763445019  |
| H | 3.59533807  | 5.386205804 | 2.748363025  |
| C | 7.451353981 | 7.352696384 | -0.581239298 |
| H | 7.923115002 | 8.221673009 | -1.048076989 |
| C | 10.99434253 | 8.917179496 | 3.943979078  |
| H | 10.26562387 | 9.700488064 | 3.724818793  |
| C | 9.281452086 | 7.455954727 | 8.884143218  |
| H | 9.95576697  | 7.03229073  | 9.630729326  |
| C | 6.531221488 | 6.244228811 | 1.361536762  |
| H | 6.292070881 | 6.249458074 | 2.42716791   |
| C | 3.589424521 | 11.52773895 | 1.073998638  |
| H | 2.711025668 | 12.16320886 | 0.938039065  |
| C | 5.792570635 | 10.005916   | 6.125083043  |
| H | 5.451337108 | 10.30514512 | 7.120296983  |
| C | 8.221325539 | 8.279943702 | 9.273198082  |
| H | 8.062661591 | 8.496914272 | 10.33231596  |
| N | 5.699437311 | 10.12242005 | 3.80452267   |
| C | 11.05076698 | 9.697951831 | 0.373936262  |
| H | 12.00400138 | 9.165457269 | 0.340372615  |
| C | 7.36778057  | 8.840457695 | 8.331857019  |
| H | 6.560124401 | 9.49264109  | 8.667102617  |
| C | 4.144070628 | 5.443070147 | 4.87467809   |
| H | 4.762319674 | 4.572685104 | 4.60812812   |
| H | 3.436749719 | 5.124624142 | 5.652441801  |
| C | 13.27892535 | 8.135079454 | 3.989184293  |
| H | 14.34475484 | 8.314359753 | 3.828961709  |
| C | 8.064564192 | 4.801639024 | 5.542437159  |
| H | 7.862861044 | 5.195955431 | 6.541490253  |
| C | 8.813688451 | 5.112567057 | 3.269406899  |
| H | 9.187491749 | 5.757095671 | 2.468794607  |
| C | 7.212171382 | 6.21132189  | -1.342020449 |
| H | 7.487200573 | 6.197749657 | -2.399142831 |
| C | 12.3539432  | 9.146155273 | 3.73874983   |

|   |             |             |              |
|---|-------------|-------------|--------------|
| H | 12.68812341 | 10.11860232 | 3.368483272  |
| C | 8.148784742 | 2.919866302 | 4.027417009  |
| H | 8.001691982 | 1.854976796 | 3.832696992  |
| C | 4.14323957  | 7.386811607 | 3.430358017  |
| H | 3.547321635 | 8.215182998 | 3.854771174  |
| C | 7.100192968 | 7.381012769 | 0.776485628  |
| C | 9.472851078 | 7.187188889 | 7.532963202  |
| H | 10.30398229 | 6.550073951 | 7.218997423  |
| C | 12.84141518 | 6.887131054 | 4.43481876   |
| H | 13.56231783 | 6.087597353 | 4.620364553  |
| C | 11.4846075  | 6.655069211 | 4.642919991  |
| H | 11.15307356 | 5.668915078 | 4.978993912  |
| C | 5.195622247 | 10.52604434 | 4.973929168  |
| H | 4.357845769 | 11.22602011 | 5.04139403   |
| C | 8.530106981 | 5.64983239  | 4.531922873  |
| C | 10.94711137 | 10.99083889 | -0.139406244 |
| H | 11.81952396 | 11.4748335  | -0.584679122 |
| C | 5.830732482 | 9.915801629 | 1.428804286  |
| C | 5.039221614 | 6.587177254 | 5.343458904  |
| H | 4.505068941 | 7.271237183 | 6.029554554  |
| H | 5.968297697 | 6.267358518 | 5.827300104  |
| H | 4.370207587 | 7.629755981 | 2.38379747   |
| O | 8.490782954 | 10.86152895 | 4.401850936  |
| C | 9.195987247 | 11.19988892 | 5.591287889  |
| C | 8.197616662 | 12.10210402 | 3.776654278  |
| C | 10.1228964  | 12.35859565 | 5.19132646   |
| H | 8.470081841 | 11.5082557  | 6.365544286  |
| H | 9.721286479 | 10.30623276 | 5.953647705  |
| C | 9.505793287 | 12.88135647 | 3.874830322  |
| H | 7.86340755  | 11.90434595 | 2.752576011  |
| H | 7.376130641 | 12.60482878 | 4.321655143  |
| H | 11.15215706 | 12.00465874 | 5.038086972  |
| H | 10.15808414 | 13.12784313 | 5.974941883  |
| H | 10.14613832 | 12.63479612 | 3.014123579  |
| H | 9.346999414 | 13.96834433 | 3.872428496  |

**Table S21.** XYZ coordinates of DFT optimized geometry of **6** (S = 1/2).

| Symbol | X            | Y           | Z           |
|--------|--------------|-------------|-------------|
| Co     | 1.469854158  | 4.151100896 | 10.29921245 |
| P      | -0.090940853 | 5.549091698 | 9.561525429 |
| N      | 0.531346471  | 2.739833083 | 9.329736483 |

|   |              |             |             |
|---|--------------|-------------|-------------|
| C | 0.47510609   | 6.882534913 | 8.475463614 |
| C | -3.068817014 | 7.097718278 | 12.69968773 |
| H | -3.787090869 | 7.444001712 | 13.44633486 |
| C | -2.065330186 | 7.314045554 | 10.51285323 |
| H | -1.99950411  | 7.834559677 | 9.553467422 |
| C | -1.041202983 | 4.366506467 | 8.535771889 |
| C | 1.089622741  | 1.587437758 | 9.474218859 |
| H | 0.71290186   | 0.667488071 | 9.012984871 |
| C | 0.750690641  | 8.14920816  | 9.009333893 |
| H | 0.523078863  | 8.370749813 | 10.05485326 |
| C | -1.238819085 | 6.216415665 | 10.78953114 |
| C | -2.253036023 | 6.000567264 | 12.97587017 |
| H | -2.326138726 | 5.48750416  | 13.9369585  |
| C | -0.621644631 | 3.021817251 | 8.555555385 |
| C | 0.76968438   | 6.615457767 | 7.131664267 |
| H | 0.558480916  | 5.633219875 | 6.699086041 |
| C | -1.337212843 | 5.562406235 | 12.02457451 |
| H | -0.691961051 | 4.709237742 | 12.25811673 |
| C | -2.974713445 | 7.752978852 | 11.4715624  |
| H | -3.617297313 | 8.609227603 | 11.25589391 |
| C | 1.300549826  | 9.141127191 | 8.203084994 |
| H | 1.503630499  | 10.12888137 | 8.622148098 |
| C | 1.58574867   | 8.87394794  | 6.864192287 |
| H | 2.01077324   | 9.655724609 | 6.230575508 |
| C | 1.32107742   | 7.613148034 | 6.330038106 |
| H | 1.536409626  | 7.406187066 | 5.279486173 |
| P | 2.757717711  | 5.48172322  | 11.5200786  |
| N | 2.671087526  | 2.692965227 | 10.79582724 |
| C | 5.052342549  | 4.538487774 | 12.91875394 |
| H | 5.196021728  | 5.559512635 | 13.28143477 |
| C | 1.97332504   | 6.19945821  | 12.98468168 |
| C | 5.19043292   | 8.606345098 | 9.193276524 |
| H | 5.779923941  | 9.332777297 | 8.629224388 |
| C | 5.782958013  | 2.235096354 | 12.80696167 |
| H | 6.498320304  | 1.457747062 | 13.08315493 |
| C | 4.279944953  | 7.840496884 | 11.29662343 |
| H | 4.157329537  | 7.973010599 | 12.3750717  |
| C | 3.967949398  | 4.234262449 | 12.09483865 |
| C | 2.295872315  | 1.559743616 | 10.31035911 |
| H | 2.823383066  | 0.616304108 | 10.4910966  |
| C | 1.412718133  | 7.482332522 | 12.91827612 |
| H | 1.547524267  | 8.099339162 | 12.02656123 |

|   |              |             |             |
|---|--------------|-------------|-------------|
| C | 5.955521295  | 3.540716711 | 13.27628579 |
| H | 6.804380643  | 3.780635956 | 13.92004684 |
| C | 3.685299305  | 6.756352477 | 10.63699509 |
| C | 4.605603469  | 7.524642312 | 8.534859552 |
| H | 4.73219842   | 7.401348376 | 7.457364982 |
| C | 3.796467768  | 2.916437236 | 11.62788869 |
| C | 1.797882013  | 5.421595009 | 14.13692176 |
| H | 2.236235756  | 4.421737082 | 14.20616829 |
| C | 3.852441873  | 6.602901239 | 9.254494275 |
| H | 3.385522597  | 5.765269162 | 8.726302377 |
| C | 5.027884258  | 8.763691921 | 10.57005341 |
| H | 5.490597651  | 9.609676332 | 11.08284858 |
| C | 0.692986753  | 7.984323875 | 13.99805792 |
| H | 0.264492464  | 8.987248723 | 13.94396976 |
| C | 4.709366878  | 1.916258808 | 11.98511631 |
| H | 4.602168855  | 0.891135594 | 11.62564954 |
| C | 0.521971695  | 7.208649716 | 15.14450525 |
| H | -0.039041492 | 7.606454499 | 15.99325573 |
| C | 1.075409211  | 5.930358751 | 15.21409361 |
| H | 0.953069483  | 5.327702648 | 16.11669254 |
| C | -1.326131185 | 2.05102083  | 7.83276212  |
| C | -2.165163509 | 4.726385756 | 7.790812873 |
| C | -2.860757029 | 3.759215176 | 7.069828224 |
| C | -2.440616473 | 2.426105832 | 7.093521819 |
| H | -2.501417196 | 5.766285165 | 7.773083496 |
| H | -3.738828695 | 4.042607819 | 6.485632502 |
| H | -2.990344395 | 1.670551703 | 6.528478533 |
| H | -1.0196231   | 1.003447154 | 7.836372329 |

**Table S22.** XYZ coordinates of DFT optimized geometry of **6** ( $S = 3/2$ ).

| <b>Symbol</b> | <b>X</b>     | <b>Y</b>    | <b>Z</b>    |
|---------------|--------------|-------------|-------------|
| Co            | 1.395115313  | 4.316062351 | 10.48698065 |
| P             | -0.471859875 | 5.535522993 | 9.766476288 |
| N             | 0.592035109  | 2.789263299 | 9.289760689 |
| C             | 0.200119885  | 6.810331627 | 8.656614879 |
| C             | -3.64098816  | 7.315412384 | 12.56490164 |
| H             | -4.397723756 | 7.723645521 | 13.23878909 |
| C             | -2.609836852 | 7.250577906 | 10.38132638 |
| H             | -2.547380107 | 7.624293533 | 9.35516757  |
| C             | -1.228009137 | 4.267353969 | 8.68133863  |
| C             | 1.139710469  | 1.648604921 | 9.494938938 |
| H             | 0.756701445  | 0.707949306 | 9.078569479 |
| C             | 0.465822668  | 8.088695018 | 9.169893087 |

|   |              |             |             |
|---|--------------|-------------|-------------|
| H | 0.157498537  | 8.349976841 | 10.18603772 |
| C | -1.716540842 | 6.271653756 | 10.84211222 |
| C | -2.747189954 | 6.351142952 | 13.02828029 |
| H | -2.798465272 | 6.004067179 | 14.06243445 |
| C | -0.584730637 | 3.016888566 | 8.531447376 |
| C | 0.587033152  | 6.491481212 | 7.348379242 |
| H | 0.376035028  | 5.50364512  | 6.929169981 |
| C | -1.781560653 | 5.831754058 | 12.17030086 |
| H | -1.068255933 | 5.091050301 | 12.54505706 |
| C | -3.569542764 | 7.768098304 | 11.24602797 |
| H | -4.266447826 | 8.529772017 | 10.89003668 |
| C | 1.102133531  | 9.038347625 | 8.376104389 |
| H | 1.295653238  | 10.03638017 | 8.775286081 |
| C | 1.482011897  | 8.719459294 | 7.071722893 |
| H | 1.9728205    | 9.470273456 | 6.448284806 |
| C | 1.224261488  | 7.448902693 | 6.559529334 |
| H | 1.507203805  | 7.202590725 | 5.533698437 |
| P | 3.187396026  | 5.535386802 | 11.35117736 |
| N | 2.650574249  | 2.684093044 | 10.98670007 |
| C | 5.418096248  | 4.418728792 | 12.71195521 |
| H | 5.769601722  | 5.439790632 | 12.87655909 |
| C | 2.278361924  | 6.196378345 | 12.7832704  |
| C | 5.595888054  | 8.875792239 | 9.337924883 |
| H | 6.166186414  | 9.668792177 | 8.848615406 |
| C | 5.707609844  | 2.039345968 | 13.02367333 |
| H | 6.269447555  | 1.201956002 | 13.44264667 |
| C | 4.875727956  | 7.770399499 | 11.36038859 |
| H | 4.864200752  | 7.714041722 | 12.45280075 |
| C | 4.244138908  | 4.191240534 | 11.99337839 |
| C | 2.355748128  | 1.620760689 | 10.33573535 |
| H | 2.974801265  | 0.713657553 | 10.34798901 |
| C | 1.723115657  | 7.482847313 | 12.70181474 |
| H | 1.962546721  | 8.130909817 | 11.8540921  |
| C | 6.149629385  | 3.347792642 | 13.22274943 |
| H | 7.064510828  | 3.535408281 | 13.78848321 |
| C | 4.143038493  | 6.855214221 | 10.58820478 |
| C | 4.859953883  | 7.975165121 | 8.56979799  |
| H | 4.849795978  | 8.060654959 | 7.481198488 |
| C | 3.821915013  | 2.862519842 | 11.76514964 |
| C | 1.978793578  | 5.376929314 | 13.88144383 |
| H | 2.420338296  | 4.379826574 | 13.96982929 |
| C | 4.130846095  | 6.964660927 | 9.191860815 |

|   |              |             |             |
|---|--------------|-------------|-------------|
| H | 3.53867667   | 6.272250908 | 8.586176713 |
| C | 5.600748391  | 8.776912574 | 10.73099114 |
| H | 6.171984894  | 9.489677861 | 11.32959608 |
| C | 0.88519728   | 7.943679881 | 13.71236633 |
| H | 0.463188215  | 8.949206556 | 13.651202   |
| C | 4.54859475   | 1.791635401 | 12.29563401 |
| H | 4.205977367  | 0.762667324 | 12.16633406 |
| C | 0.589571507  | 7.126265975 | 14.8044035  |
| H | -0.064732567 | 7.492953693 | 15.59848214 |
| C | 1.137728617  | 5.847353678 | 14.88944831 |
| H | 0.921014236  | 5.213592771 | 15.75223458 |
| C | -1.108023177 | 2.061484051 | 7.651824815 |
| C | -2.406295485 | 4.514008641 | 7.974311748 |
| C | -2.930259331 | 3.552860548 | 7.112955117 |
| C | -2.273694451 | 2.333041537 | 6.945426803 |
| H | -2.923582231 | 5.469007368 | 8.093126857 |
| H | -3.849635756 | 3.759644589 | 6.561346366 |
| H | -2.671477671 | 1.586538722 | 6.254819527 |
| H | -0.603193547 | 1.106210592 | 7.495278983 |

**Table S23.** XYZ coordinates of DFT optimized geometry of  $7_s$

| <b>Symbol</b> | <b>X</b>    | <b>Y</b>    | <b>Z</b>    |
|---------------|-------------|-------------|-------------|
| Co            | 5.82118213  | 4.155845685 | 12.11250847 |
| P             | 4.802117738 | 2.278849699 | 11.54922486 |
| P             | 6.814476686 | 4.72584443  | 10.19721419 |
| P             | 4.19330696  | 5.681415256 | 12.14923331 |
| N             | 7.284718796 | 4.955808053 | 12.94112493 |
| N             | 5.462378205 | 3.528459095 | 13.84710933 |
| C             | 4.36714172  | 2.693711946 | 14.14358625 |
| C             | 2.133997195 | 1.027762722 | 14.47701699 |
| H             | 1.264653784 | 0.381974427 | 14.61494276 |
| C             | 3.763661965 | 2.098539069 | 10.06695851 |
| C             | 2.694855055 | 1.186401615 | 13.21151331 |
| H             | 2.275833208 | 0.65173959  | 12.3546297  |
| C             | 8.26203662  | 5.717399562 | 12.26047507 |
| C             | 8.188717604 | 5.717344682 | 10.85656844 |
| C             | 10.17815028 | 7.07568363  | 10.71227333 |
| H             | 10.9330834  | 7.593668729 | 10.11762896 |
| C             | 3.798088985 | 2.021768209 | 13.04499172 |
| C             | 2.420963013 | 2.496128032 | 10.07671806 |
| H             | 1.950763126 | 2.820363746 | 11.00936846 |
| C             | 4.347922155 | 1.692351125 | 8.857840305 |
| H             | 5.399690551 | 1.393282083 | 8.825202994 |

|   |             |              |             |
|---|-------------|--------------|-------------|
| C | 5.934928462 | 5.766066384  | 8.979474994 |
| C | 6.266688921 | 4.058820287  | 14.79152299 |
| H | 6.139597822 | 3.843921556  | 15.85442075 |
| C | 3.811633069 | 2.511453927  | 15.41547708 |
| H | 4.225759889 | 3.022422797  | 16.28615006 |
| C | 9.149394538 | 6.377012267  | 10.08818754 |
| H | 9.095158758 | 6.335119521  | 8.996525209 |
| C | 7.276125704 | 4.853258262  | 14.29184015 |
| H | 8.015653551 | 5.343538171  | 14.92632109 |
| C | 9.300120621 | 6.426370519  | 12.88046795 |
| H | 9.39101912  | 6.45440535   | 13.96665498 |
| C | 7.635332761 | 3.417248857  | 9.212853485 |
| C | 7.574024296 | 3.32186847   | 7.818208319 |
| H | 7.038858609 | 4.070166399  | 7.230810481 |
| C | 4.94798986  | 5.168242615  | 8.181157592 |
| H | 4.758575769 | 4.095195484  | 8.252151095 |
| C | 10.24058602 | 7.099675829  | 12.10689263 |
| H | 11.04628802 | 7.64448911   | 12.60466862 |
| C | 1.673653586 | 2.482324805  | 8.899821635 |
| H | 0.625474647 | 2.789350914  | 8.919896796 |
| C | 8.367037211 | 2.46374879   | 9.9317093   |
| H | 8.446335874 | 2.549622165  | 11.01746867 |
| C | 5.877823542 | 0.791044668  | 11.60223038 |
| C | 2.700175134 | 1.6872562    | 15.56970963 |
| H | 2.26447453  | 1.561237351  | 16.56366669 |
| C | 7.022940698 | 0.832344902  | 12.40835869 |
| H | 7.288805288 | 1.758909966  | 12.92467333 |
| C | 5.353329478 | 7.916654661  | 8.022497479 |
| H | 5.51402485  | 8.995624988  | 7.965849351 |
| C | 4.382183091 | 7.31185974   | 7.226987714 |
| H | 3.77674803  | 7.916518764  | 6.547847652 |
| C | 8.993289521 | 1.408993915  | 9.276462192 |
| H | 9.547230268 | 0.665623574  | 9.854245242 |
| C | 4.184678213 | 5.932865837  | 7.305127232 |
| H | 3.421615812 | 5.44707599   | 6.692588506 |
| C | 6.130502424 | 7.149336458  | 8.891576296 |
| H | 6.888894488 | 7.641768099  | 9.504490884 |
| C | 5.532096599 | -0.407438828 | 10.96787575 |
| H | 4.625945052 | -0.473407528 | 10.36108031 |
| C | 7.82091285  | -0.298486081 | 12.55632073 |
| H | 8.710910113 | -0.254210435 | 13.18844424 |
| C | 4.952899364 | 7.296519488  | 12.54655176 |
| H | 5.503171421 | 7.211264174  | 13.49483669 |
| H | 4.192602878 | 8.086060153  | 12.63909426 |



|   |             |              |             |
|---|-------------|--------------|-------------|
| H | 5.668128664 | 7.574618895  | 11.75974141 |
| C | 2.259101843 | 2.07083265   | 7.70316343  |
| H | 1.670043767 | 2.055011676  | 6.783203772 |
| C | 3.088371843 | 6.078218845  | 10.7464453  |
| H | 3.62659741  | 6.648560608  | 9.980421543 |
| H | 2.244857192 | 6.685675309  | 11.10567402 |
| H | 2.701201306 | 5.161009376  | 10.283091   |
| C | 8.203638483 | 2.263582861  | 7.162687873 |
| H | 8.148687914 | 2.195819335  | 6.073705335 |
| C | 3.596143571 | 1.673912702  | 7.685145952 |
| H | 4.062102521 | 1.349083952  | 6.751928275 |
| C | 8.902464601 | 1.301224615  | 7.888692535 |
| H | 9.387880035 | 0.470300368  | 7.371538218 |
| C | 7.487049414 | -1.48122846  | 11.89759874 |
| H | 8.116968605 | -2.367060058 | 12.007582   |
| C | 6.339966768 | -1.534234812 | 11.10805977 |
| H | 6.063692343 | -2.462125791 | 10.60218613 |
| C | 2.987339611 | 5.477483834  | 13.50922956 |
| H | 2.3883375   | 4.567956272  | 13.35994467 |
| H | 2.316336369 | 6.347888175  | 13.54829367 |
| H | 3.512460313 | 5.387089724  | 14.46944044 |

**Table S24.** XYZ coordinates of DFT optimized geometry of 7<sub>r</sub>

| <b>Symbol</b> | <b>X</b>  | <b>Y</b> | <b>Z</b>  |
|---------------|-----------|----------|-----------|
| Co            | 5.877646  | 4.015058 | 12.0918   |
| P             | 4.716535  | 2.196254 | 11.479574 |
| P             | 6.985353  | 4.660007 | 10.25588  |
| P             | 4.219739  | 5.815421 | 12.109692 |
| N             | 7.215928  | 5.05888  | 13.050957 |
| N             | 5.380309  | 3.447854 | 13.883569 |
| C             | 4.305268  | 2.596793 | 14.131569 |
| C             | 2.083595  | 0.897953 | 14.408159 |
| H             | 1.21639   | 0.244531 | 14.520497 |
| C             | 3.52864   | 2.129622 | 10.100987 |
| C             | 2.66728   | 1.078538 | 13.156874 |
| H             | 2.255263  | 0.564797 | 12.283766 |
| C             | 8.163524  | 5.853599 | 12.41317  |
| C             | 8.208879  | 5.781176 | 11.003608 |
| C             | 10.092781 | 7.299836 | 10.957988 |
| H             | 10.852428 | 7.850917 | 10.400474 |
| C             | 3.768034  | 1.923779 | 13.013128 |
| C             | 2.285762  | 2.764407 | 10.222512 |
| H             | 1.984474  | 3.197778 | 11.180419 |
| C             | 3.889212  | 1.5604   | 8.872478  |

|   |           |           |           |
|---|-----------|-----------|-----------|
| H | 4.853992  | 1.057651  | 8.76341   |
| C | 6.064014  | 5.591013  | 8.979681  |
| C | 6.181156  | 3.962587  | 14.820894 |
| H | 6.088532  | 3.694156  | 15.87736  |
| C | 3.713975  | 2.403075  | 15.390319 |
| H | 4.093555  | 2.928888  | 16.268246 |
| C | 9.188178  | 6.481525  | 10.290731 |
| H | 9.247906  | 6.375492  | 9.203727  |
| C | 7.178151  | 4.832541  | 14.369896 |
| H | 7.906659  | 5.268563  | 15.059317 |
| C | 9.074775  | 6.695879  | 13.076414 |
| H | 9.044887  | 6.798531  | 14.162312 |
| C | 7.999381  | 3.40113   | 9.391579  |
| C | 7.510716  | 2.673452  | 8.300664  |
| H | 6.54928   | 2.926395  | 7.850174  |
| C | 5.013445  | 4.945149  | 8.311767  |
| H | 4.759104  | 3.910918  | 8.549141  |
| C | 10.019482 | 7.408869  | 12.350612 |
| H | 10.719077 | 8.058613  | 12.881979 |
| C | 1.422005  | 2.83615   | 9.13198   |
| H | 0.452794  | 3.328755  | 9.238755  |
| C | 9.248125  | 3.061522  | 9.929967  |
| H | 9.651833  | 3.618717  | 10.779424 |
| C | 5.753309  | 0.704392  | 11.30997  |
| C | 2.615679  | 1.560409  | 15.51748  |
| H | 2.15748   | 1.426782  | 16.500304 |
| C | 7.127619  | 0.821122  | 11.534683 |
| H | 7.563858  | 1.797073  | 11.763125 |
| C | 5.52728   | 7.624395  | 7.772511  |
| H | 5.725772  | 8.68013   | 7.574294  |
| C | 4.505655  | 6.96455   | 7.092016  |
| H | 3.901207  | 7.501454  | 6.357349  |
| C | 9.988354  | 2.012931  | 9.389351  |
| H | 10.963474 | 1.765278  | 9.815479  |
| C | 4.250531  | 5.621217  | 7.364467  |
| H | 3.438667  | 5.096894  | 6.855108  |
| C | 6.305402  | 6.943517  | 8.708944  |
| H | 7.094854  | 7.483137  | 9.234992  |
| C | 5.207327  | -0.555392 | 11.027629 |
| H | 4.132855  | -0.667068 | 10.857613 |
| C | 7.953575  | -0.299263 | 11.461777 |
| H | 9.027341  | -0.192533 | 11.630344 |
| C | 5.030138  | 7.401025  | 12.548366 |
| H | 5.582364  | 7.284702  | 13.49145  |

|   |           |           |           |
|---|-----------|-----------|-----------|
| H | 4.296246  | 8.213171  | 12.658203 |
| H | 5.752294  | 7.674794  | 11.765108 |
| C | 1.791507  | 2.276069  | 7.908998  |
| H | 1.112943  | 2.331104  | 7.054537  |
| C | 3.132195  | 6.341743  | 10.728804 |
| H | 3.734699  | 6.814758  | 9.941566  |
| H | 2.382523  | 7.066708  | 11.079666 |
| H | 2.619956  | 5.477463  | 10.284983 |
| C | 8.251685  | 1.621896  | 7.765426  |
| H | 7.85925   | 1.066024  | 6.910876  |
| C | 3.023165  | 1.634962  | 7.782637  |
| H | 3.313872  | 1.187211  | 6.82956   |
| C | 9.489656  | 1.286218  | 8.30991   |
| H | 10.069071 | 0.462336  | 7.887495  |
| C | 7.406068  | -1.545553 | 11.170355 |
| H | 8.050003  | -2.426278 | 11.11327  |
| C | 6.031875  | -1.673171 | 10.956305 |
| H | 5.600445  | -2.652005 | 10.735172 |
| C | 3.01541   | 5.614095  | 13.478612 |
| H | 2.394753  | 4.721995  | 13.30907  |
| H | 2.361987  | 6.49445   | 13.568323 |
| H | 3.554192  | 5.469787  | 14.425524 |

**Table S25.** XYZ coordinates of DFT optimized geometry of **7<sub>os</sub>**

| <b>Symbol</b> | <b>X</b>    | <b>Y</b>    | <b>Z</b>    |
|---------------|-------------|-------------|-------------|
| Co            | 5.8370196   | 4.089778852 | 12.09482802 |
| P             | 4.757387918 | 2.236569706 | 11.48963863 |
| P             | 6.905184016 | 4.686836944 | 10.23439568 |
| P             | 4.195357366 | 5.771242353 | 12.13089056 |
| N             | 7.265993397 | 5.0016057   | 13.01323347 |
| N             | 5.420530913 | 3.464216071 | 13.8656945  |
| C             | 4.325658466 | 2.628443074 | 14.12396236 |
| C             | 2.091452359 | 0.951527125 | 14.40237666 |
| H             | 1.220091443 | 0.303771443 | 14.51627467 |
| C             | 3.63256342  | 2.108387169 | 10.06517961 |
| C             | 2.67720601  | 1.123345082 | 13.14969649 |
| H             | 2.26830813  | 0.603309149 | 12.27889728 |
| C             | 8.228268479 | 5.777437723 | 12.35506646 |
| C             | 8.21181057  | 5.737362037 | 10.94566636 |
| C             | 10.16116714 | 7.163866268 | 10.85176557 |
| H             | 10.92267619 | 7.69217233  | 10.27497432 |
| C             | 3.781071059 | 1.962420945 | 13.0067955  |
| C             | 2.338041972 | 2.638543607 | 10.13785994 |
| H             | 1.956756628 | 3.025903836 | 11.08705732 |

|   |             |              |             |
|---|-------------|--------------|-------------|
| C | 4.100004866 | 1.609143597  | 8.841327589 |
| H | 5.110878196 | 1.198912259  | 8.764876181 |
| C | 5.996698519 | 5.672278295  | 8.990973739 |
| C | 6.201802171 | 4.002250523  | 14.80882169 |
| H | 6.076215311 | 3.774170352  | 15.87063308 |
| C | 3.738225125 | 2.440226335  | 15.38247646 |
| H | 4.126953443 | 2.955682297  | 16.26240611 |
| C | 9.188952776 | 6.407526042  | 10.20499411 |
| H | 9.192921872 | 6.327839455  | 9.114150285 |
| C | 7.212399293 | 4.842884429  | 14.34371737 |
| H | 7.926427987 | 5.315435952  | 15.0228908  |
| C | 9.209718984 | 6.549066897  | 12.9979147  |
| H | 9.243092403 | 6.61547642   | 14.08629621 |
| C | 7.831597945 | 3.402578633  | 9.311141577 |
| C | 7.459328818 | 2.945266195  | 8.043075557 |
| H | 6.63645211  | 3.414941772  | 7.501795285 |
| C | 4.947230679 | 5.053125616  | 8.295248644 |
| H | 4.700122155 | 4.007021571  | 8.48498493  |
| C | 10.15678455 | 7.235930016  | 12.24726647 |
| H | 10.91453709 | 7.831045431  | 12.76252401 |
| C | 1.52526141  | 2.669137336  | 9.006181141 |
| H | 0.515242348 | 3.079605886  | 9.075252684 |
| C | 8.923549063 | 2.806180798  | 9.957628568 |
| H | 9.245312535 | 3.168049372  | 10.93894525 |
| C | 5.824880499 | 0.753814505  | 11.42871564 |
| C | 2.6291117   | 1.609418991  | 15.51034609 |
| H | 2.170923483 | 1.479536941  | 16.49362134 |
| C | 7.113260155 | 0.851240441  | 11.96351451 |
| H | 7.472832426 | 1.812469458  | 12.34125378 |
| C | 5.455977031 | 7.754517208  | 7.872002959 |
| H | 5.652759003 | 8.817873961  | 7.717802841 |
| C | 4.433786994 | 7.123147064  | 7.165958159 |
| H | 3.826631185 | 7.690662425  | 6.456973901 |
| C | 9.614572772 | 1.759772964  | 9.355347088 |
| H | 10.46454148 | 1.30516776   | 9.869247444 |
| C | 4.182522173 | 5.768069967  | 7.378799434 |
| H | 3.372245877 | 5.264264056  | 6.846695517 |
| C | 6.237953291 | 7.034566673  | 8.776214462 |
| H | 7.0322923   | 7.550467567  | 9.319267541 |
| C | 5.362584482 | -0.487099972 | 10.97032203 |
| H | 4.351880057 | -0.586011869 | 10.56508632 |
| C | 7.936234222 | -0.271376378 | 12.02707218 |
| H | 8.940737635 | -0.184925662 | 12.44766822 |
| C | 4.98959696  | 7.37267898   | 12.5334982  |

|   |             |              |             |
|---|-------------|--------------|-------------|
| H | 5.559320665 | 7.275250073  | 13.46864425 |
| H | 4.246391832 | 8.175857233  | 12.64632429 |
| H | 5.693499407 | 7.645895988  | 11.73379752 |
| C | 1.997254255 | 2.171928015  | 7.791504946 |
| H | 1.357921755 | 2.192586138  | 6.905807417 |
| C | 3.07426495  | 6.246741795  | 10.76104859 |
| H | 3.639913071 | 6.753780408  | 9.968638548 |
| H | 2.296070831 | 6.932393927  | 11.12788816 |
| H | 2.597535131 | 5.360056338  | 10.3217429  |
| C | 8.150462858 | 1.891859945  | 7.445048414 |
| H | 7.850527139 | 1.546190428  | 6.453009562 |
| C | 3.283837679 | 1.639798937  | 7.712021049 |
| H | 3.658337766 | 1.245310757  | 6.764583489 |
| C | 9.223021258 | 1.293015936  | 8.10090776  |
| H | 9.76250813  | 0.468710442  | 7.629154672 |
| C | 7.477786748 | -1.497761719 | 11.55274506 |
| H | 8.123338536 | -2.378068623 | 11.59687857 |
| C | 6.189710009 | -1.604833343 | 11.02581314 |
| H | 5.823749594 | -2.567432689 | 10.66148863 |
| C | 3.013202272 | 5.569532745  | 13.51673744 |
| H | 2.401271815 | 4.668402559  | 13.36496262 |
| H | 2.351043764 | 6.444020676  | 13.59831655 |
| H | 3.562052103 | 5.44769406   | 14.46085295 |

## References

- 1 G. S. Day, B. Pan, D. L. Kellenberger, B. M. Foxman and C. M. Thomas, *Chem. Commun.*, 2011, **47**, 3634–3636.
- 2 R. A. Andersen, A. M. Bryan, M. Faust, P. P. Power, A. M. Bryan, P. P. Power, R. A. Andersen, M. Faust, P. P. Power and R. A. Andersen, in *Inorganic Syntheses*, John Wiley & Sons, Ltd, 2018, pp. 1–14.
- 3 V. W. Manner, T. F. Markle, J. H. Freudenthal, J. P. Roth and J. M. Mayer, *Chem. Commun.*, 2007, 256–258.
- 4 S. Stoll and A. Schweiger, *Journal of Magnetic Resonance*, 2006, **178**, 42–55.
- 5 F. Neese, *WIREs Computational Molecular Science*, 2022, **12**, e1606.
- 6 F. Neese, *WIREs Computational Molecular Science*, 2018, **8**, e1327.
- 7 F. Neese, *WIREs Computational Molecular Science*, 2012, **2**, 73–78.
- 8 J.-D. Chai and M. Head-Gordon, *Phys. Chem. Chem. Phys.*, 2008, **10**, 6615–6620.
- 9 F. Weigend, *Phys. Chem. Chem. Phys.*, 2006, **8**, 1057–1065.
- 10 F. Weigend and R. Ahlrichs, *Phys. Chem. Chem. Phys.*, 2005, **7**, 3297–3305.
